# Supplementary material for: Can goal-setting for patients with multimorbidity improve outcomes in primary care? Cluster randomised feasibility trial
Source: PubMed Central journal article supplement (PMC6561432; doi:10.1136/bmjopen-2018-025332), 2019-06-03
Supplement: bmjopen-2018-025332.draft_revisions.pdf [file bmjopen-2018-025332.draft_revisions.pdf]

# BMJ Open

BMJ Open is committed to open peer review. As part of this commitment we make the peer review history of every article we publish publicly available.

When an article is published we post the peer reviewers' comments and the authors' responses online. We also post the versions of the paper that were used during peer review. These are the versions that the peer review comments apply to.

The versions of the paper that follow are the versions that were submitted during the peer review process. They are not the versions of record or the final published versions. They should not be cited or distributed as the published version of this manuscript.

BMJ Open is an open access journal and the full, final, typeset and author-corrected version of record of the manuscript is available on our site with no access controls, subscription charges or pay-per-view fees (<http://bmjopen.bmj.com>).

If you have any questions on BMJ Open's open peer review process please email [editorial.bmjopen@bmj.com](mailto:editorial.bmjopen@bmj.com)

# BMJ Open

## Goal-setting for patients with multimorbidity in primary care: a cluster randomised feasibility trial

|                               |                                                                                                                                                                                                                                                                                                                                                                                                                                                                                                                                                                                                                           |
|-------------------------------|---------------------------------------------------------------------------------------------------------------------------------------------------------------------------------------------------------------------------------------------------------------------------------------------------------------------------------------------------------------------------------------------------------------------------------------------------------------------------------------------------------------------------------------------------------------------------------------------------------------------------|
| Journal:                      | <i>BMJ Open</i>                                                                                                                                                                                                                                                                                                                                                                                                                                                                                                                                                                                                           |
| Manuscript ID                 | bmjopen-2018-025332                                                                                                                                                                                                                                                                                                                                                                                                                                                                                                                                                                                                       |
| Article Type:                 | Research                                                                                                                                                                                                                                                                                                                                                                                                                                                                                                                                                                                                                  |
| Date Submitted by the Author: | 10-Jul-2018                                                                                                                                                                                                                                                                                                                                                                                                                                                                                                                                                                                                               |
| Complete List of Authors:     | Ford, John; University of East Anglia, Public Health<br>Lenaghan, E; University of East Anglia<br>Salter, Charlotte; University of East Anglia<br>Turner, David; University of East Anglia, Public Health and Primary Care<br>Shiner, A.; University of East Anglia<br>Clark, Allan; Norwich Medical School<br>Murdoch, Jamie; University of East Anglia, School of Nursing Sciences<br>Green, Carole<br>Lipp, Alistair; NHS England Midlands & East,, West Wing<br>Moseley, Annie<br>Wade, Tom; University of East Anglia<br>Winterburn, Sandra; University of East Anglia<br>Steel, Nicholas; University of East Anglia |
| Keywords:                     | PRIMARY CARE, HEALTH SERVICES ADMINISTRATION & MANAGEMENT, SOCIAL MEDICINE                                                                                                                                                                                                                                                                                                                                                                                                                                                                                                                                                |
|                               |                                                                                                                                                                                                                                                                                                                                                                                                                                                                                                                                                                                                                           |

SCHOLARONE™  
Manuscripts

**Title**

**Goal-setting for patients with multimorbidity in primary care: a cluster randomised feasibility trial**

**Authors**

John A. Ford, Elizabeth Lenaghan, Charlotte Salter, David A. Turner, Alice Shiner, Allan Clark, Jamie Murdoch, Carole Green, Alistair Lipp, Annie Moseley, Tom Wade, Sandra Winterburn, Nick Steel

**Corresponding author**

Prof Nick Steel

Norwich Medical School  
University of East Anglia  
Chancellor's Drive  
Norwich  
NR4 7TJ

[n.steel@uea.ac.uk](mailto:n.steel@uea.ac.uk)

01603 591161

*Trials registration:*

Title: Goal-setting in care planning for people with multimorbidity

Trial ID: ISRCTN13248305

Date registered: 21/12/2016

Link: <http://www.isrctn.com/ISRCTN13248305>

*Protocol:* Available at:

<http://www.uea.ac.uk/documents/246046/14839702/GoalPlan+Research+Protocol+v1.2+170316.pdf/86549c5b-c4ed-435b-8719-4c3160f9793f>

*Word count:* 4173

*Keywords:* goals, multimorbidity, primary health care, patient-centred care, randomized controlled trial

## Abstract

### Introduction

Goal-setting has been recommended for patients with multimorbidity, but there is little evidence to support use in general practice.

### Objective

To assess the feasibility of goal-setting for patients with multimorbidity with a view to undertaking a definitive trial.

### Design and setting

Cluster-randomised controlled feasibility trial of goal-setting compared to usual care planning in six general practices. Blinding was not possible.

### Participants

Adults, at risk of unplanned admission, diagnosed with  $\geq 2$  chronic health problems and eligible for a care planning consultation.

### Interventions

In the three goal-setting practices, General Practitioners (GPs) underwent training and patients were asked to consider goals before an initial goal-setting consultation and six month follow-up consultation. The control group received usual care planning.

### Outcome measures

Standard scales for health-related quality of life (EQ5D), capability (ICECAP-O) and care for chronic conditions (PACIC) and health care use at six months. All consultations were video-recorded, and focus groups held with participating GPs and patients.

### Results

Fifty-two participants were recruited (response rate 9%) and full follow-up data was available for 41. Mean age was 78.7 years (SD 9.2) and median prescribed medications 12 (IQR 9-17), 46% were women, and 69% had slight cognitive impairment. Participants in the goal-setting group set between one and three goals on a wide range of subjects. The goal-setting group had higher scores for shared decision-making compared to the usual care planning group, but not statistically significantly. There was no significant difference in EQ5D or PACIC between groups, and ICECAP-O was slightly higher in usual care planning. Patient participants found goal-setting acceptable and would have liked more frequent follow-up. GPs unanimously liked goal-setting, felt it delivered more patient-centred care and highlighted the importance of training.

### Conclusions

This goal-setting intervention was feasible to deliver in general practice. A larger, definitive study is needed to test its effectiveness.

1  
2  
3  
4  
5  
6  
7  
8  
9  
10  
11  
12  
13  
14  
15  
16  
17  
18  
19  
20  
21  
22  
23  
24  
25  
26  
27  
28  
29  
30  
31  
32  
33  
34  
35  
36  
37  
38  
39  
40  
41  
42  
43  
44  
45  
46  
47  
48  
49  
50  
51  
52  
53  
54  
55  
56  
57  
58  
59  
60

**Article summary**

- Goal-setting is recommended for patients with multimorbidity, but there is currently little evidence to support its use in primary care.
- Here we present a feasibility study of goal-setting in primary care for patients with multimorbidity.
- We found that goal-setting was acceptable to patients and unanimously supported by GPs who felt it helped deliver more patient-centred care.
- A larger, definitive trial is needed to test the effectiveness and cost-effectiveness of goal-setting.

For peer review only

## Introduction

The rising number of long-term conditions and prescribed medications has increased the burden of treatment for patients [1]. People with multimorbidity (defined as two or more chronic conditions [1]) tend to have a lower quality of life and worse health than those with single conditions [2].

Medical outcomes that work well for relatively healthy patients (e.g. blood pressure control, or disease-free survival) may be inappropriate for patients with multimorbidity or severe disability [3 4], and the use of current single-disease guidelines in this group can encourage harmful polypharmacy with resulting drug-drug and drug-disease interactions [5].

Personalised care planning is 'a conversation in which patients and clinicians agree goals and actions for managing the patient's conditions' [6]. Goal-setting, the sharing of realistic treatment goals by physicians and patients, is core to the theory and effective practice of care planning and is particularly important for patients with multimorbidity [6 7]. Patient engagement and co-production with goal-setting as part of a care planning process is currently recommended by NICE for patients with multimorbidity [8]. Despite this recommendation, there is little evidence to support the use of goal-setting between general practitioners and patients, and it is rarely used in primary care [6 9 10]. A recent systematic review highlighted the lack of evidence exploring 'the effects of personalised care planning on goal-attainment, especially patient's personal goals as opposed to goals determined by clinicians or researchers' [11]. Our goal-setting intervention was designed within the context of a nationally funded recommendation that the top 2% of patients at risk of admission should have a care plan [12]. The extra funding for this care planning has now been removed, but the recommendation for GPs to discuss care plans with patients with complex needs remains.

We aimed to assess the feasibility of goal-setting for patients with multimorbidity, at high risk of hospital admission and eligible for a care planning consultation, with a view to undertaking a future definitive randomised controlled trial. Our objectives were to assess participant recruitment and retention, the acceptability of a goal-setting intervention to patients and GPs, the training needs of GPs, the content of usual care planning consultations, goal-setting and the feasibility of collecting relevant outcome measures.

## Methods

### *Setting*

We undertook a parallel group, cluster randomised controlled feasibility trial of goal-setting compared to usual care in six general practices in Norfolk and Suffolk with six months follow-up. There were no significant changes to the protocol, which is publicly available [13]. Research ethics approval was obtained from the NHS Research Ethics Committee (16/EM/0411). Participants were recruited between April and May 2017 and follow-up completed in February 2018.

### *Eligibility criteria*

General practices were recruited via the East of England Clinical Research Network on a first-come first-served basis. Patients were eligible if they were aged 18 or over, identified as in the top 2% for risk of unplanned admission as part of the 'Avoiding Unplanned Admissions' Enhanced Service [12], eligible for a new or review care planning consultation during the data collection period and diagnosed with at least two of 40 morbidities in Barnett's analysis of multimorbidity [1]. Patients were excluded if they were deemed to be unable to participate in goal-setting in the GP's professional opinion (e.g. advanced dementia or acute psychosis), in receipt of care planning consultation in previous three months or required translation services to communicate verbally.

### *Recruitment*

Each practice undertook a search of their electronic patient register, according to the eligibility criteria, and sent a letter of invitation to 100 identified patients, with the intention of recruiting 10 patients per practice. Patient participants were randomly selected with oversampling in postcodes in the lowest Index of Multiple Deprivation quartile [14] to increase the likelihood of recruiting participants from a range of socio-economic groups. The protocol allowed GPs to opportunistically invite patients they thought might be interested, however no patients were recruited through this process. Interested patients were visited by a study researcher to discuss the study and obtain written informed consent.

### *Randomisation*

The Norwich Clinical Trials Unit independently randomised three practices to goal-setting and three to usual care planning, by simple block randomisation using a 1:1 ratio and sealed opaque envelopes. Practices were randomised after at least 10 expressions of interest were received from patients. It was not possible to blind participants, health professionals or researchers due to the nature of the intervention.

### *Intervention*

GPs from practices allocated to goal-setting received training in the form of a three hour experiential workshop, led by senior consultation skills tutors (CS and SW) and a GP with experience in communication skills training (AS). The training model we developed built on both the work of Elwyn and colleagues on shared decision making [15 16] and the Calgary Cambridge Guide [17]. It included an introduction to the study, interactive skill spotting and role-play. GPs were trained in groups of three and provided in advance with a detailed handbook. Usual care planning group GPs received no training and were asked to undertake a care planning consultation as they would usually do in routine clinical practice.

1  
2  
3 Patient participants in the goal-setting arm were given a face-to-face explanation of goal-setting  
4 lasting approximately 15 minutes and a patient held goal-setting sheet (PGS) by the study researcher  
5 (EL) with three questions to consider prior to their consultation. The questions were: what's  
6 important to you and what would you like to achieve over the next 6 months; why is it important to  
7 you; and, what are the first steps you would like to take towards achieving this goal or goals? (See  
8 Supplementary Appendix 1). During the initial goal-setting consultation GPs, in partnership with  
9 participants, documented the goals which had been agreed. Participants in both the usual care  
10 planning and the goal-setting groups had an initial consultation which lasted about 20 minutes, but  
11 only patients in the goal-setting arm were invited back for a follow-up consultation after 6 months to  
12 discuss their goal attainment.  
13

### 14 *Data*

15  
16 Quantitative and qualitative data were used to meet our feasibility study objectives. Key data on  
17 recruitment and retention were collected throughout the trial. Postcode IMD scores for participants  
18 and practices were recorded. Data collected from patients during a researcher visit at baseline and  
19 six months assessed health-related quality of life and capability (EQ-5D-5L [18], ICECAP-O [19]),  
20 cognition (general practitioner assessment of cognition scale [20]) and patient centred care (patient  
21 assessment of care for chronic conditions scale [21]). Data collected from the electronic patient  
22 record included demographics (baseline only), medications on repeat prescription, diagnoses,  
23 Quality and Outcomes Framework information [22] and primary and secondary care use.  
24  
25

26 GPs and patient participants were asked to complete an assessment of shared decision making  
27 during each consultation using the CollaboRATE scale [23] for patients and dyadic OPTION scale [24]  
28 for GPs. GPs and patients in the goal-setting group were asked to discuss and complete a goal  
29 attainment scaling (GAS-Light) questionnaire [25] (See Supplementary Appendix 2) at the second  
30 consultation. Goal attainment was scored using the following system: -1 = worse than expected, 0 =  
31 no change, 1 = partially attained, 2 = as expected, 3 = a little more and 4 = a lot more than expected.  
32  
33

34 All initial consultations were video or audio recorded and transcribed. Three team members scored  
35 the consultations using the observer OPTION measure to assess shared decision making [26]. One  
36 focus group was held with patients and one with GPs from the goal-setting group at the end of the  
37 six month follow-up period to discuss perspectives, experiences and overall acceptability of the goal-  
38 setting intervention. Both focus groups lasted about 90 minutes, were held at the university, guided  
39 by a topic guide, audio-recorded and transcribed. Participants unable to attend the focus group were  
40 interviewed by phone using the same topic guide.  
41

### 42 *Statistical analysis*

43  
44 The recruitment rate was summarised by practice and by randomisation group. Demographic  
45 variables were compared for those recruited and those not recruited. The characteristics of baseline  
46 consultations were summarised both by practice and by intervention group. Key characteristics were  
47 compared using a linear mixed model with practice included as a random effect.  
48

49 The change in outcome measures from baseline to follow-up was summarised using descriptive  
50 statistics by randomisation group. Exploratory analysis estimated the difference between  
51 randomisation groups using a linear mixed model with practice included as a random effect. This  
52 would allow the estimation of potential differences in a full scale trial. The intra cluster correlation  
53 coefficient was estimated for each outcome, however great care should be taken in the  
54 interpretation of these due to the small number of clusters [27].  
55  
56  
57  
58  
59  
60



### *Health economic evaluation*

Data were collected on resource use from an NHS perspective to test data collection processes and to inform a future health economic evaluation estimating quality adjusted life years (QALYs). A record was kept of resources required to provide GP training, as well as the length of initial and follow-up goal-setting consultations. Additional health care resource use was extracted from electronic health records by practices supported by a study researcher (EL) for the 6-months prior to randomisation and from randomisation to follow-up. Health care use was collected for: day-case and inpatient hospital admissions; outpatient visits; accident and emergency visits (A&E); consultations at the GP practice (GP, practice nurse, health care assistant, nurse practitioners); and other contacts, such as district nursing, allied health professional contacts, ambulance call outs, and specialist nursing contacts.

Resource use was costed using the NHS reference costs [28] for secondary care and a published source for primary care contacts [29]. NHS reference costs were used to estimate a weighted average cost for day cases, non-elective short stay, non-elective long stay, and elective admissions. For longer stays, additional days were costed using a weighted average of all excess bed day costs. For the first and second GP consultations in the goal-setting group, we had data on length of consultation and setting. The cost of providing training was estimated from a description given by the study researcher of duration and required staff. The cost of academic staff time was estimated using University pay scales (including employer's national insurance and superannuation payments). As the training would have relevance beyond the duration of the study, we estimated a useful life of 3 years and calculated an annual equivalent cost[30]. All costs are in 2015/16 UK pounds sterling. As the duration of the study was 6-months, we did not discount costs and benefits. As the study size was very small with great variability in estimates of cost and effect, we did not estimate formal cost-effectiveness.

### *Review of video-recorded consultations*

The usual care planning and goal-setting consultations were compared by the research team (CS, EL, AS, JM and RH) to measure duration and explore the content and methodological implications for a future study. An in-depth analysis of the consultations using a conversation analytic informed approach [31] to explore sequential patterns, verbal and non-verbal behaviours and turn taking will be reported elsewhere.

### *Focus groups*

A thematic framework-based analysis was used to analyse the focus groups [32]. This enabled a structured summarised overview of the acceptability of the goal-setting intervention to patients and GPs and an understanding of possible future improvements to the goal-setting intervention, training and trial design.

### *Patient and Public Involvement (PPI)*

Two PPI representatives contributed to the design of the research as co-applicants on the initial application for funding (AM and HS) and steering group membership (AM and CG). Furthermore PPI members contributed to the analysis and interpretation of the results, with one PPI representative reviewing and scoring video consultations (RH) and a further two reviewing a selection of video consultation transcripts (AM and CG). Two PPI members reviewed and commented on the manuscript and are co-authors (AM and CG).

## Results

### *Recruitment and retention*

Sixty general practices were invited with seven expressing interest and six being recruited (Figure 1). Across the six practices (Table 1), 550 patients met the eligibility criteria and were invited. In total, 52 patients were recruited (9.5%) with 24 belonging to practices randomised to goal-setting and 28 to practices in the usual care planning group. There was little variation in age and deprivation between those who participated and those who did not, but slightly fewer women (46%) than men took part (Supplementary Table 1). Two participants in the goal-setting group and five in the usual care planning group did not receive the initial consultation because they declined to attend, were unavailable or withdrew consent. Four participants in the goal-setting group did not receive the follow-up consultation because of ill health or death. Data collected directly from participants were available for 18 participants in the goal-setting group and 23 in the usual care planning group. Participant data collected from practices were available for 23 participants in the goal-setting group and 28 in the usual care planning group. Recruitment started in

### *Baseline characteristics of practices and participants*

The usual care planning practices were in more urbanised areas with larger practice populations and more female GPs participating compared to goal-setting practices (Table 2). The goal-setting group, compared to usual care planning, had more patient participants who were female (54% compared to 29%), older (80 years old compared to 77), with a higher number of health problems (5 compared to 4) and medications (13.0 compared to 11.5), but similar quality of life (Table 3). The usual care planning group had participants spread across all four IMD quartiles, whereas the goal-setting group had participants in only the second and third quartiles. Table 1 shows that there was variation in mean age (range 69.5 to 85.8 years old), proportion of females (range 25% to 73%), number of medications (range 10.0 to 15.5) and number of health problems (range 3.0 to 7.5) across participating practices.

### *Consultation findings*

The mean initial consultation time in the goal-setting group was 23.0 minutes and in the usual care planning 19.2 minutes (Table 4). Patients spoke more in the goal-setting group initial consultation (mean GP:patient word count ratio (WCR) 1.35) compared to usual care planning (WCR 1.52). Dyadic OPTION scores for GPs perceptions of shared decision making were higher, but not statistically significantly, in the goal-setting group compared to the usual care planning group, but collaboRATE scores were similar. Observer OPTION scores proved less informative because of large variation and inconsistency in scoring between the three research team members (data not presented).

Most patients set two or three goals (Table 5), with Practice 1 setting on average one more goal than Practice 3. The commonest type of goals were related to management of chronic conditions, walking, maintaining social and leisure interests or weight management (Table 6). Forty-two of the 50 goals were scored with a mean attainment score per patient of 1.45 (1= partially attained and 2= as expected) with 'partially attained' being the commonest outcome.

Based on review of the initial and follow-up goal-setting consultations, we found variation in the extent to which patients were prepared for the goal-setting consultation, either in terms of considering goals or completing the suggested goal-setting sheets. Some patients quickly understood the concept of goal-setting and were able to identify suitable goals, whereas others found this process more difficult. The term 'care planning' was not mentioned in any consultation.

1  
2  
3 In the usual care planning arm, goals were rarely mentioned. However, whilst four usual-care GPs  
4 followed the care planning template recommended within the Enhanced Service [12], one GP  
5 appeared to treat it as a normal consultation (i.e. problem focused) and another focused entirely on  
6 end of life issues. The consultations were generally doctor-led and, despite covering a wide range of  
7 topics from mobility aids to end of life wishes, were not structured to plan care according to the  
8 patient's own goals and concerns.  
9

### 10 *Outcome measures*

11  
12 There was no statistically significant difference between goal-setting and usual care planning from  
13 baseline to follow-up in PACIC score, health-related quality of life as measured by EQ5D, number of  
14 medications or GPCOG score (Table 7). Capability as measured by ICECAP-O at six months, improved  
15 slightly more in the usual care planning group than in the goal-setting group (mean difference  
16 between groups 0.12, 95% CI 0.02 to 0.22).  
17

18 There was considerable variation in health care use in the 6 months prior to randomisation and 6  
19 months follow-up as was expected with a small study (Table 8). Most health care contact increased  
20 in both the usual care planning and goal-setting groups, but district nurse contacts increased and  
21 inpatient admissions decreased only in the goal-setting group. Quality and Outcomes Framework  
22 data were collected at baseline and follow-up, but the results were uninformative due to low  
23 numbers and low variability (Supplementary Table 2). There was one death in the goal-setting group  
24 due to cancer, which was judged to be unrelated to the intervention. The estimated cost of the goal-  
25 setting was £147 per patient, of which £95 related to costs of providing initial and follow-up GP  
26 consultations, and £43 related to the cost of GP training. There was a small cost for the study  
27 researcher to explain goal-setting. A mean cost of £50 per patient was incurred in the usual care  
28 planning group for the initial consultation. The single largest cost for the 6-months prior to  
29 recruitment and the 6-months of follow-up was inpatient stays (Table 8). However, significant costs  
30 occurred outside the hospital setting, for example in general practice contacts and district nurse  
31 services. Costs were very heterogeneous, as would be expected.  
32  
33  
34

### 35 *Acceptability and methodological implications for a definitive trial from focus group data*

36 All six patient participants attending the focus group reported positive experiences and views of the  
37 intervention, particularly regarding the different emphasis of the consultation. Participants spoke of  
38 using goals to plan and focus their lives, helping them to direct their energy onto something that  
39 really mattered to them. The patient below encapsulated this, saying:  
40  
41

42 *"[Goal-setting] gives he or she a much better understanding of particularly what is worrying*  
43 *you, what your aims are, the things that you miss being able to do and to be able to actually*  
44 *explain it where [GPs] have time, because very often the GPs, you know, you've only got ten*  
45 *minutes. But with these consultations, you're actually able to talk to a doctor, as you would*  
46 *indeed a friend almost" (Patient 107)*  
47

48 There was unanimous support for the intervention amongst the four GPs who attended the GP focus  
49 group and one GP who was interviewed by phone. GPs described the goal-setting consultations as  
50 *more patient-centred and reflected on its 'therapeutic powers'* s (GP10) compared to day-to-day  
51 general practice that GPs felt could be dominated by 'box-ticking' and 'target driven' (GP018)  
52 medicine. Extract 1 below illustrates this sentiment:  
53

54 *"I felt almost as if I was trying to put on a different hat, you know, trying not to constantly*  
55 *interrupt them or to sort of sway them in any way, I was trying to give them the opportunity*  
56  
57  
58  
59  
60

1  
2  
3 *to just say what they wanted to say and set any goal that they wanted to and I, and it made*  
4 *me reflect on actually what I do during the day to day when I've got ten minutes with a*  
5 *patient and I'm very aware of the sort of pressure of, oh I've got to do a medication review*  
6 *and I've got to do this and oh no, their cholesterol's now 7 and oh gosh I've, have my*  
7 *colleagues already spoke to them about this and are they aware of X, Y and Z and actually it*  
8 *was quite nice in a way just take a step back and think, um I don't have to do that with this*  
9 *consultation, let's see what happens when the patient has more control over it" (GP025)*  
10

11 Patient participants spoke positively about the baseline researcher visit because it helped them  
12 understand the study and encouraged them to reflect on what was important. However, when  
13 discussing wider implementation across the health service, participants acknowledged that a home  
14 visit for each patient may be too costly and alternative provision would be acceptable to most  
15 people.  
16

17 Continuity of care was a concern for patient participants. While one person was disappointed not to  
18 see their own GP, three were positive about consulting with a different doctor, especially if it was  
19 difficult to see their usual GP. However, participants spoke of wanting more follow-up and  
20 consistency amongst the health care team in relation to their goals in the future; some participants  
21 felt there was a disconnection between the activity of goal setting and their subsequent treatment  
22 by staff within the practice.  
23  
24

25 GPs stated that the experiential work, especially role play and skill spotting, was the most useful  
26 aspect of training. When discussing delivering training at scale, GPs felt e-training with opportunities  
27 to watch 'other people role-play', would fit in with their busy schedules. In addition, multiple shorter  
28 e-training modules, using a 'step-by-step' approach (GP014) that contributed to continuing  
29 professional development, would be attractive to GPs when implementing the intervention more  
30 widely.  
31  
32  
33  
34  
35  
36  
37  
38  
39  
40  
41  
42  
43  
44  
45  
46  
47  
48  
49  
50  
51  
52  
53  
54  
55  
56  
57  
58  
59  
60

## Discussion

### *Summary of principal finding*

We found that the overall process of setting goals, reviewing them in a GP consultation and follow-up over six months was acceptable to patients and unanimously supported by participating GPs. Recruitment and retention of practices and patients was achieved. A wide range of goals were set and, as expected with a feasibility study, there were no statistically significant differences in the main outcomes, except for the ICECAP-O score which was slightly higher in the usual care planning group. The qualitative findings were that goal-setting helped patients and GPs focus on what was important and supported GPs to deliver more patient-centred care. Patient preparedness, continuity of care and being able to deliver training at scale were highlighted as important future considerations.

### *Strengths and weakness of the study*

Whilst recruitment was sufficient, there was under-recruitment in one practice (Practice 3 recruited four out of a target of ten), perhaps because of the small practice size. Those GPs and patients choosing to take part are also likely to be a self-selecting group who are willing to take part in research and are open to goal-setting. An intention-to-treat analysis was undertaken to reduce the impact of protocol violations (e.g. patients not receiving the pre-specified intervention) and attrition bias. Data on the number of health problems were not sufficiently robust for analysis because they were extracted from practice records using different processes. Asking GPs in the non-intervention group to undertake a video-recorded usual care planning consultation is likely to have altered practice compared to what would have happened within the enhanced service.

### *Implications for a definitive trial*

Goal-setting training was important, and the small group face-to-face training with role play could be delivered at scale to the whole GP workforce using online e-learning, based on material collected during this feasibility study.

Both EQ-5D-5L and the ICECAP-O could be used any future economic evaluation. While EQ5D values did not differ between groups, ICECAP-O improved more in the usual care planning participants. This may be a spurious finding due to the small number of participants in the goal-setting arm, or because they were slightly older with more health problems and therefore more likely to deteriorate during follow-up.

Quality and Outcomes Framework data did not prove useful because of the small numbers and low variation. The observer OPTION scoring, initially developed within a rehabilitation context, had poor consistency between researchers and therefore was less useful. The readiness of patients to undertake goal-setting appeared to be important.

The disconnection reported by patients when goals they had set were not considered in future health care contact suggests that more effort is needed in future studies to ensure that goals were communicated with the rest of the health care team. Additional follow-up with their GP may support continuity, which has recently been associated with lower mortality [33].

### *Comparison with other studies*

A Cochrane review, published in 2015, assessed the effects of personalised care planning (defined as goal-setting and action planning), for adults with long term health conditions compared to usual care [6]. Whilst 19 RCTs were included, all except for one focused on single conditions. The one multiple

1  
2  
3 condition study included patients who had high health care use and focused on care planning, with  
4 goal-setting as part of the process, across the wider health care system to reduce unplanned  
5 admissions [34]. The authors found an increase in quality of life (measured by SF36) in the  
6 intervention compared to control, however with 50% of participants lost to follow-up and intention  
7 to treat not undertaken, there is a possibility of a lost to follow-up bias in favour of the intervention.  
8 Our study has focused on goal-setting specifically in primary care.  
9

10 A systematic review of randomised and non-randomised studies, published in 2017, looked at  
11 collaborative goal-setting or health priority setting for elderly people with a chronic condition or  
12 multimorbidity [11]. Based on eight included studies, the authors found that in four intervention  
13 studies multifactorial approaches had positive effects on the application of goal-setting or care  
14 planning, but the review did not assess the impact on health outcomes or quality of life. The authors  
15 conclude that future research is needed to determine the “mix of essential elements within a  
16 multifactorial intervention to provide recommendations on daily practice”. Our study helps to  
17 answer this question by identifying some key requirements of goal-setting in primary care as  
18 described above.  
19  
20

### 21 *Implications for clinical practice*

22  
23 This was a feasibility study and the main implications are for the design of a subsequent definitive  
24 trial. Goal-setting consultations increased opportunities for GPs to deliver more patient-centred care  
25 for patients with complex health conditions, with no longer consultations than in the comparator  
26 care planning group. Care planning consultations are likely to remain an important part of the work  
27 of GPs, particularly with frail patients [35], and an ageing population with multimorbidity. Our study  
28 suggests that goal-setting can be a valuable tool for GPs to carry out patient-centred assessments.  
29  
30  
31  
32  
33  
34  
35  
36  
37  
38  
39  
40  
41  
42  
43  
44  
45  
46  
47  
48  
49  
50  
51  
52  
53  
54  
55  
56  
57  
58  
59  
60

1  
2  
3 Competing interests: None declared.  
4  
5

6 Author contributions: NS, JF, CS and AS conceived the idea. All authors contributed to the design of  
7 the study. LL led the data collection. CS, JM and AS led the analysis of the qualitative data. AC  
8 undertook the statistical analysis. DT undertook the economic analysis. All authors contributed to  
9 the interpretation of the results. JF drafted the initial manuscript. All authors revised the manuscript  
10 and approved the final version. NS is the guarantor.  
11  
12  
13

14 Acknowledgements: We thank Becky Harmston for reviewing the video-consultations from the  
15 patient and public involvement perspective. We thank Clara Yates and Gosia Majsak-Newman at the  
16 Norfolk and Suffolk Primary and Community Care Research Office for their support. Finally we thank  
17 the patients and staff who took part in the study.  
18  
19  
20

21 *Funding statement:* This work was supported by the National Institute for Health Research -  
22 Research for Patient Benefit programme grant number PB-PG-0215-36079. This article/paper/report  
23 presents independent research funded by the National Institute for Health Research (NIHR). The  
24 views expressed are those of the author(s) and not necessarily those of the NHS, the NIHR or the  
25 Department of Health. The funder did not have any role in the design, collection, analysis or  
26 interpretation of data or in writing the manuscript.  
27  
28  
29

30 Data sharing: Requests for data sharing from this trial should be directed to the corresponding  
31 author.  
32  
33  
34  
35  
36  
37  
38  
39  
40  
41  
42  
43  
44  
45  
46  
47  
48  
49  
50  
51  
52  
53  
54  
55  
56  
57  
58  
59  
60



## References

1. Barnett K, Mercer SW, Norbury M, Watt G, Wyke S, Guthrie B. Epidemiology of multimorbidity and implications for health care, research, and medical education: a cross-sectional study. *Lancet* 2012;**380**(9836):37-43 doi: 10.1016/s0140-6736(12)60240-2.
2. Fortin M, Lapointe L, Hudon C, Vanasse A, Ntetu AL, Maltais D. Multimorbidity and quality of life in primary care: a systematic review. *Health Qual Life Outcomes* 2004;**2**:51-51 doi: 10.1186/1477-7525-2-51.
3. Wilkie P. Really putting patients first: ensuring significant involvement for patients in healthcare decision making. *Br J Gen Pract* 2015;**65**(632):108-09 doi: 10.3399/bjgp15X683821.
4. Reuben DB, Tinetti ME. Goal-Oriented Patient Care — An Alternative Health Outcomes Paradigm. *N Eng J Med* 2012;**366**(9):777-79 doi: 10.1056/NEJMp1113631.
5. Guthrie B, Payne K, Alderson P, McMurdo MET, Mercer SW. Adapting clinical guidelines to take account of multimorbidity. *BMJ* 2012;**345** doi: 10.1136/bmj.e6341.
6. Coulter A, Entwistle VA, Eccles A, Ryan S, Shepperd S, Perera R. Personalised care planning for adults with chronic or long-term health conditions. *Cochrane Database Syst Rev* 2015(3):Cd010523 doi: 10.1002/14651858.CD010523.pub2.
7. Muth C, van den Akker M, Blom JW, et al. The Ariadne principles: how to handle multimorbidity in primary care consultations. *BMC Med* 2014;**12**:223 doi: 10.1186/s12916-014-0223-1.
8. National Institute for Health and Care Excellence. Multimorbidity: clinical assessment and management NICE guideline [NG56]. London, 2016.
9. Reeves D, Hann M, Rick J, et al. Care plans and care planning in the management of long-term conditions in the UK: a controlled prospective cohort study. *Br J Gen Pract* 2014;**64**(626):e568-75 doi: 10.3399/bjgp14X681385.
10. Burt J, Roland M, Paddison C, et al. Prevalence and benefits of care plans and care planning for people with long-term conditions in England. *J Health Serv Res Policy* 2012;**17** Suppl 1:64-71 doi: 10.1258/jhsrp.2011.010172.
11. Vermunt NPCA, Harmsen M, Westert GP, Olde Rikkert MGM, Faber MJ. Collaborative goal setting with elderly patients with chronic disease or multimorbidity: a systematic review. *BMC Geriatr* 2017;**17**:167 doi: 10.1186/s12877-017-0534-0.
12. NHS England. Enhanced service specification: Avoiding unplanned admissions: proactive case finding and patient review for vulnerable people, 2014.
13. Steel N, Clark A, Ford J, et al. Goal-setting in care planning for people with multimorbidity: feasibility study and intervention refinement Norwich: University of East Anglia,, 2016.
14. English indices of deprivation 2015. Ministry of Housing, Communities & Local Government, London, 2015.
15. Elwyn G, Frosch D, Thomson R, et al. Shared Decision Making: A Model for Clinical Practice. *J Gen Intern Med* 2012;**27**(10):1361-67 doi: 10.1007/s11606-012-2077-6.
16. Elwyn G, Durand MA, Song J, et al. A three-talk model for shared decision making: multistage consultation process. *BMJ* 2017;**359** doi: 10.1136/bmj.j4891.
17. Silverman J, Kurtz S, Draper J. *Skills for communicating with patients*: CRC Press, 2016.
18. Herdman M, Gudex C, Lloyd A, et al. Development and preliminary testing of the new five-level version of EQ-5D (EQ-5D-5L). *Qual Life Res* 2011;**20**(10):1727-36 doi: 10.1007/s11136-011-9903-x.
19. Coast J, Flynn TN, Natarajan L, et al. Valuing the ICECAP capability index for older people. *Soc Sci Med* 2008;**67**(5):874-82 doi: 10.1016/j.socscimed.2008.05.015.
20. Brodaty H, Pond D, Kemp NM, et al. The GPCOG: a new screening test for dementia designed for general practice. *J Am Geriatr Soc* 2002;**50**(3):530-4.
21. Glasgow RE, Wagner EH, Schaefer J, Mahoney LD, Reid RJ, Greene SM. Development and validation of the Patient Assessment of Chronic Illness Care (PACIC). *Med Care* 2005;**43**(5):436-44.



- 1  
2  
3 22. Employers N. 16 General Medical Services (GMS) contract Quality and Outcomes Framework  
4 (QOF). *NHS England Gateway reference* 2014;**1264**(2014):2014-15.
- 5 23. Barr PJ, Thompson R, Walsh T, Grande SW, Ozanne EM, Elwyn G. The psychometric properties of  
6 CollaboRATE: a fast and frugal patient-reported measure of the shared decision-making  
7 process. *J Med Internet Res* 2014;**16**(1):e2 doi: 10.2196/jmir.3085.
- 8 24. Melbourne E, Sinclair K, Durand MA, Legare F, Elwyn G. Developing a dyadic OPTION scale to  
9 measure perceptions of shared decision making. *Patient Educ Couns* 2010;**78**(2):177-83 doi:  
10 10.1016/j.pec.2009.07.009.
- 11 25. Turner-Stokes L. Goal attainment scaling (GAS) in rehabilitation: a practical guide. *Clin Rehabil*  
12 2009;**23**(4):362-70 doi: 10.1177/0269215508101742.
- 13 26. Barr PJ, O'Malley AJ, Tsulukidze M, Gionfriddo MR, Montori V, Elwyn G. The psychometric  
14 properties of Observer OPTION5, an observer measure of shared decision making. *Patient*  
15 *Educ Couns* 2015;**98**(8):970-76 doi: <https://doi.org/10.1016/j.pec.2015.04.010>.
- 16 27. Eldridge SM, Costelloe CE, Kahan BC, Lancaster GA, Kerry SM. How big should the pilot study for  
17 my cluster randomised trial be? *Stat Methods Med Res* 2016;**25**(3):1039-56 doi:  
18 10.1177/0962280215588242.
- 19 28. Department of Health and Social Care. NHS reference costs 2015 to 2016. London, 2016.
- 20 29. Curtis L. Unit Costs of Health and Social Care 2017. In: Personal Social Services Research Unit, ed.  
21 Canterbury: University of Kent 2017.
- 22 30. Drummond MF, Sculpher MJ, Claxton K, Stoddart GL, Torrance GW. *Methods for the economic*  
23 *evaluation of health care programmes*: Oxford university press, 2015.
- 24 31. Drew P, Chatwin J, Collins S. Conversation analysis: a method for research into interactions  
25 between patients and health-care professionals. *Health Expect* 2001;**4**(1):58-70.
- 26 32. Ritchie J, Lewis J, Nicholls CM, Ormston R. *Qualitative research practice: A guide for social science*  
27 *students and researchers*: Sage, 2013.
- 28 33. Pereira Gray DJ, Sidaway-Lee K, White E, Thorne A, Evans PH. Continuity of care with doctors—a  
29 matter of life and death? A systematic review of continuity of care and mortality. *BMJ Open*  
30 2018;**8**(6) doi: 10.1136/bmjopen-2017-021161.
- 31 34. Battersby M, Harvey P, Mills PD, et al. SA HealthPlus: a controlled trial of a statewide application  
32 of a generic model of chronic illness care. *Milbank Q* 2007;**85**(1):37-67 doi: 10.1111/j.1468-  
33 0009.2007.00476.x.
- 34 35. NHS England. Supporting routine frailty identification and frailty through the GP Contract  
35 2017/2018. London, 2017.
- 36 36. 2011 Rural/urban Classification. In: Office for National Statistics, ed. London, 2011.
- 37  
38  
39  
40  
41  
42  
43  
44  
45  
46  
47  
48  
49  
50  
51  
52  
53  
54  
55  
56  
57  
58  
59  
60

Figure 1: Consort flow diagram (N= number of practice, n= number of individuals)

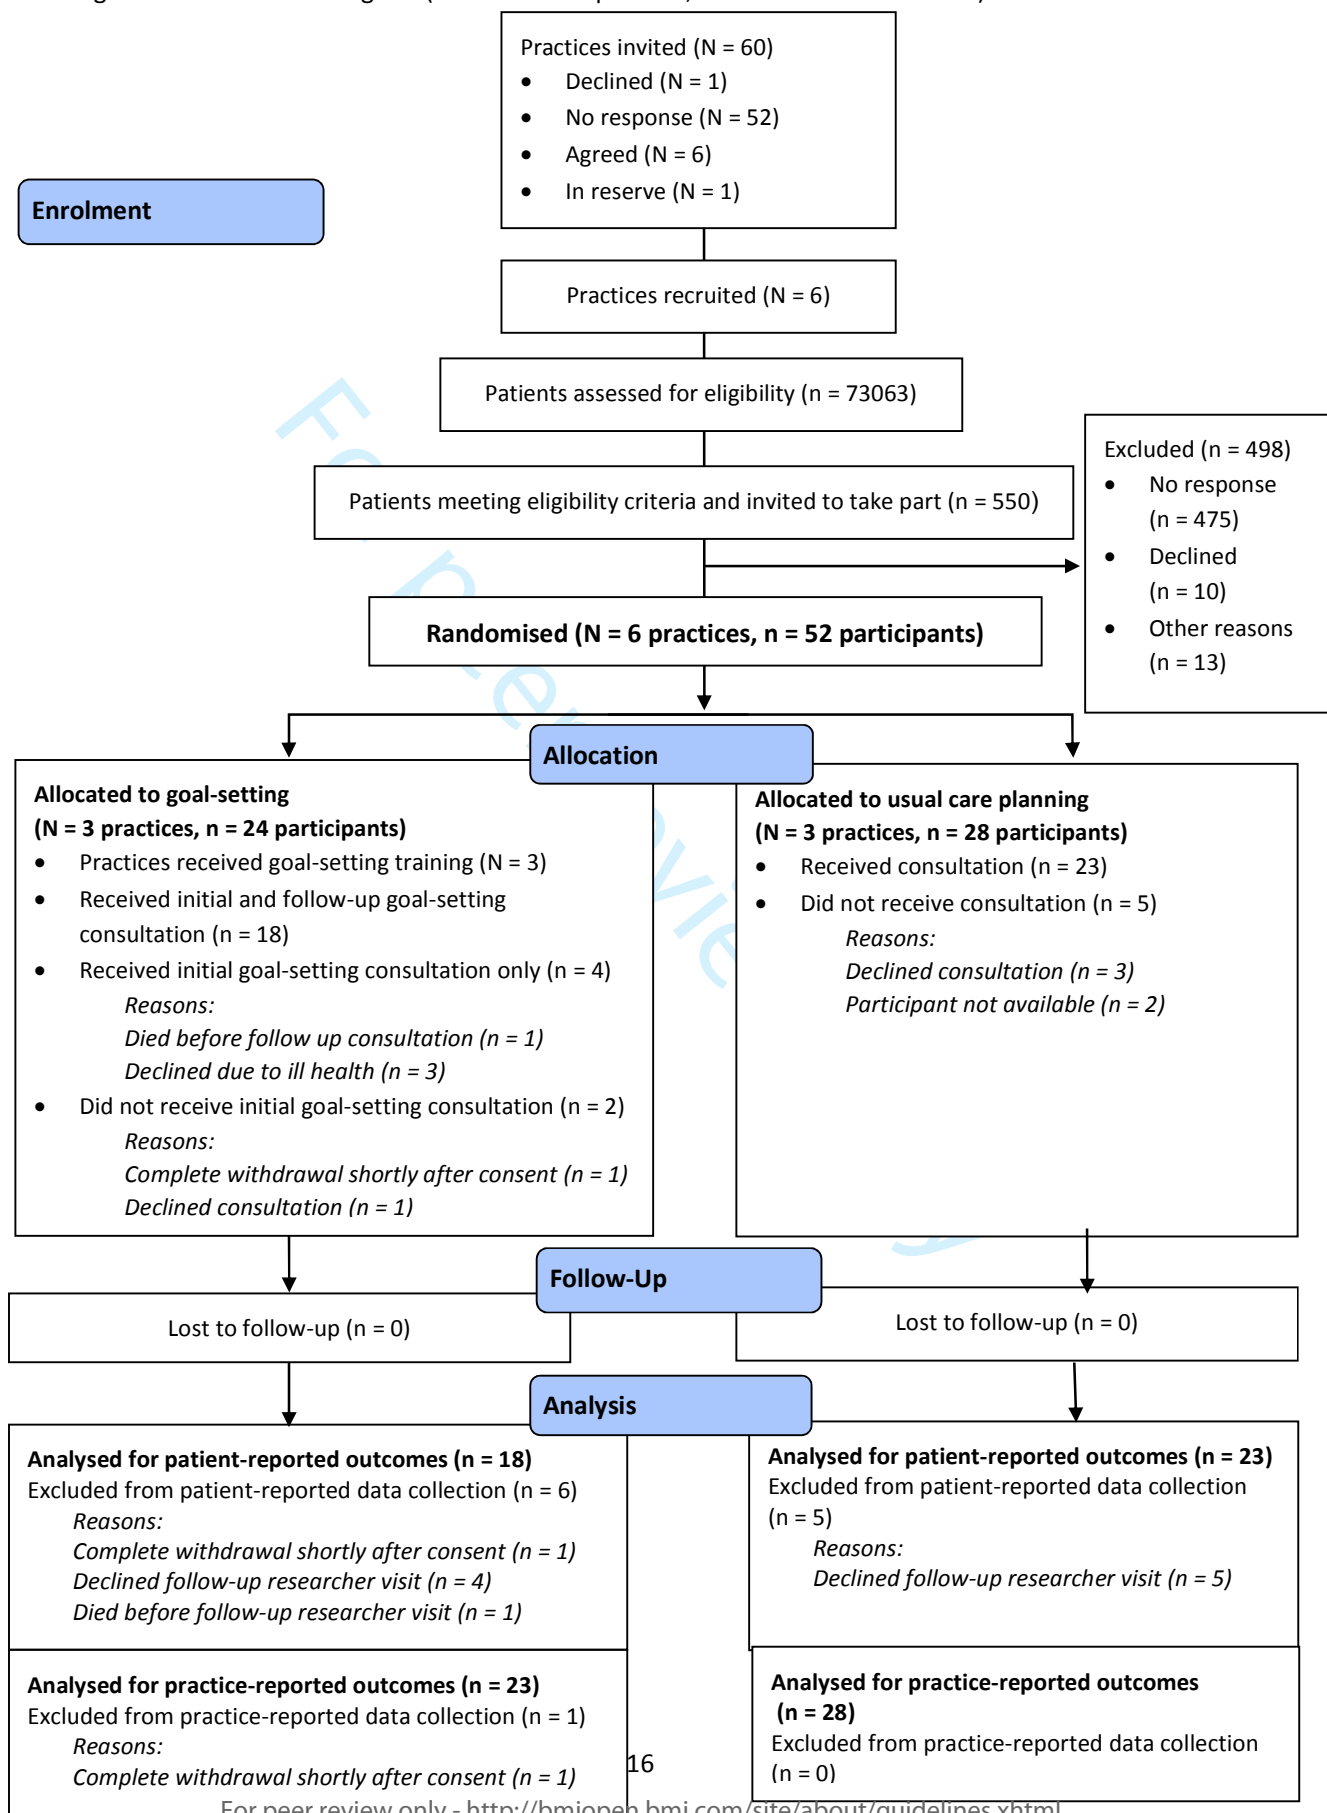

Table 1: Practice level recruitment and baseline characteristics

|                                                | Goal-setting        |                    |                    |                     | Usual care planning |                    |                    |                    | Grand total        |
|------------------------------------------------|---------------------|--------------------|--------------------|---------------------|---------------------|--------------------|--------------------|--------------------|--------------------|
|                                                | Practice 1          | Practice 2         | Practice 3         | Goal-setting total  | Practice 4          | Practice 5         | Practice 6         | Control total      |                    |
| <b>Practice level recruitment</b>              |                     |                    |                    |                     |                     |                    |                    |                    |                    |
| Patients assessed for eligibility (n)          | 9067                | 14845              | 6791               | 30703               | 18540               | 10381              | 13439              | 42360              | 73063              |
| Patients invited (n)                           | 77                  | 108                | 47                 | 232                 | 108                 | 124                | 86                 | 318                | 550                |
| Recruited (n)                                  | 11                  | 9                  | 4                  | 24                  | 8                   | 10                 | 10                 | 28                 | 52                 |
| <b>Practice level baseline characteristics</b> |                     |                    |                    |                     |                     |                    |                    |                    |                    |
| Age (mean SD)                                  | 78.5 (10.4)         | 82.9 (6.7)         | 80.3 (8.3)         | 80.4 (8.7)          | 85.8 (5.4)          | 69.5 (7.5)         | 78.0 (7.5)         | 77.1 (9.4)         | 78.7 (9.2)         |
| Female (n %)                                   | 8 (73%)             | 4 (44%)            | 1 (25%)            | 13 (54%)            | 5 (62%)             | 3 (30%)            | 3 (30%)            | 11 (39%)           | 24 (46%)           |
| Number of medications (median IQR)             | 13.5 (11.8 to 17.3) | 10.0 (9.0 to 17.5) | 15.5 (6.5 to 18.5) | 13.0 (10.0 to 17.0) | 10.5 (9.3 to 15.5)  | 12.0 (6.5 to 17.5) | 12.0 (4.0 to 16.8) | 11.5 (7.0 to 16.0) | 13.0 (9.0 to 17.0) |
| Number of diagnoses* (median IQR)              | 5.0 (3.8 to 5.3)    | 4.0 (3.0 to 6.5)   | 7.5 (3.0 to 9.0)   | 5.0 (3.0 to 5.0)    | 5.0 (3.0 to 5.0)    | 4.5 (3.8 to 5.0)   | 3.0 (2.0 to 4.3)   | 4.0 (3.0 to 5.0)   | 4.0 (3.0 to 6.0)   |

n= number, SD = standard deviation, IQR = Interquartile Range, \* = based on Barnett list [1]

Table 2: Characteristics of participating practices

|                                      | Goal-setting                             |                                            |                           | Usual care planning                                |                                     |                                               |
|--------------------------------------|------------------------------------------|--------------------------------------------|---------------------------|----------------------------------------------------|-------------------------------------|-----------------------------------------------|
|                                      | Practice 1                               | Practice 2                                 | Practice 3                | Practice 4                                         | Practice 5                          | Practice 6                                    |
| Practice rurality*                   | Village                                  | Town and fringe                            | Town and fringe           | Urban >10K                                         | Urban >10K                          | Urban >10K                                    |
| Patient population                   | 5000 to 9,900                            | 10,000 to 14,900                           | 5000 to 9,900             | >14,900                                            | 10,000 to 14,900                    | 10,000 to 14,900                              |
| IMD practice decile                  | 7                                        | 5                                          | 7                         | 9                                                  | 5                                   | 5                                             |
| Characteristics of participating GPs | 2 x male<br>(partners, 2 x PT)           | 1 x male, 1 x female<br>(partners, 2 x FT) | 1 x male<br>(partner, PT) | 1 x male, 1 x female<br>(partners, 1 x FT, 1 x PT) | 2 x female<br>(partners, 2 x PT)    | 2 x female<br>(partners, 2 x PT)              |
| Years qualified of participating GPs | GP014 = >20 yrs;<br>GP018 = 10 to 20 yrs | GP025 = <10 yrs;<br>GP026 = 10 to 20 yrs   | GP038 = 10 to 20 yrs      | GP046 = >20 yrs;<br>GP047 = >20 yrs                | GP053 = >20 yrs;<br>GP055 = >20 yrs | GP061 = 10 to 20 yrs;<br>GP067 = 10 to 20 yrs |

\* ONS indicator 2011 [36], IMD = Index of Multiple Deprivation (1= most deprived and 10 least deprived), partner = GP with responsibility for the practice, FT= full time, PT = part time,

Table 3: Baseline characteristics of patient participants

| Variable                                 |                                               | Usual care planning | Goal-setting         |
|------------------------------------------|-----------------------------------------------|---------------------|----------------------|
| Number                                   |                                               | 28                  | 24                   |
| Female n (%)                             |                                               | 11 (39%)            | 13 (54%)             |
| Age mean (SD)                            |                                               | 77.18 (9.42)        | 80.42 (8.72)         |
| Number of medications median (IQR)       |                                               | 11.50 (7.00, 16.00) | 13.00 (10.00, 17.00) |
| GPCOG category n (%)                     | Impairment and further investigations implied | 1 (4%)              | 0 (0%)               |
|                                          | Informant interview required                  | 17 (61%)            | 19 (79%)             |
|                                          | No cognitive impairment                       | 10 (36%)            | 5 (21%)              |
| PACIC score mean (SD)                    |                                               | 1.49 (0.35)         | 1.92 (0.71)          |
| EQ-5Q-5L score mean (SD)                 |                                               | 0.53 (0.35)         | 0.52 (0.30)          |
| EQ-5D-5L Visual Analogue Scale mean (SD) |                                               | 60.18 (23.39)       | 64.96 (18.16)        |
| ICECAP-O score mean (SD)                 |                                               | 0.74 (0.24)         | 0.77 (0.14)          |
| Number of diagnoses* median (IQR)        |                                               | 4.00 (3.00, 5.00)   | 5.00 (3.00, 6.00)    |
| IMD national quartile n (%)              | 1                                             | 5 (18%)             | 0 (0%)               |
|                                          | 2                                             | 9 (32%)             | 14 (58%)             |
|                                          | 3                                             | 3 (11%)             | 10 (42%)             |
|                                          | 4                                             | 11 (39%)            | 0 (0%)               |
| Marital status n (%)                     | Divorced                                      | 0 (0%)              | 2 (8%)               |
|                                          | Living with partner                           | 0 (0%)              | 2 (8%)               |
|                                          | Married                                       | 12 (43%)            | 10 (42%)             |
|                                          | Single                                        | 2 (7%)              | 4 (17%)              |
|                                          | Widowed                                       | 14 (50%)            | 6 (25%)              |

N= number, SD = standard deviation, IQR = Interquartile Range, GPCOG = General Practitioner assessment of Cognition, PACIC = Patients Assessment Chronic Illness Care, EQ-5Q-5L = 5 level EQ-5D, ICECAP-O = ICEpop CAPability measure for Older people, \* = based on Barnett list [1], IMD = Index of Multiple Deprivation

Table 4: Characteristics of baseline consultations

|                                                   | Intervention group  |                    |                    |                             | Control group      |                    |                    |                        | Mean difference between intervention and control (95% CI) |
|---------------------------------------------------|---------------------|--------------------|--------------------|-----------------------------|--------------------|--------------------|--------------------|------------------------|-----------------------------------------------------------|
|                                                   | Practice 1 (n = 10) | Practice 2 (n = 8) | Practice 3 (n = 4) | Intervention total (n = 22) | Practice 4 (n = 7) | Practice 5 (n = 9) | Practice 6 (n = 7) | Control total (n = 23) |                                                           |
| Duration of initial consultation (mins) mean (SD) | 24.1 (4.0)          | 23.3 (4.4)         | 19.9 (6.2)         | 23.0 (4.6)                  | 14.3 (4.8)         | 25.2 (5.7)         | 16.3 (4.1)         | 19.2 (6.9)             | 3.88 (-3.25,11.01)                                        |
| Dyadic OPTION scores mean (SD)                    | 65.3 (9.0)          | 63.2 (6.4)         | 62.5 (3.6)         | 64.0 (7.2)                  | 63.5 (13.0)        | 62.7 (4.0)         | 42.1 (20.4)        | 56.6 (16.2)            | 7.57 (-6.37,21.50)                                        |
| CollaboRATE scores mean (SD)                      | 7.8 (1.0)           | 8.5 (0.9)          | 8.8 (0.2)          | 8.2 (1.0)                   | 7.0 (2.6)          | 8.6 (0.7)          | 8.7 (0.6)          | 8.1 (1.8)              | 0.20 (-1.06,1.47)                                         |
| GP:patient word count ratio mean (SD)             | 1.23 (0.40)         | 1.41 (0.78)        | 1.50 (1.05)        | 1.35 (0.67)                 | 1.13 (0.45)        | 1.92 (0.75)        | 1.39 (0.52)        | 1.52 (0.67)            | -0.14 (-0.65,0.37)                                        |

SD= standard deviation, n= number, 95%CI = 95% confidence interval

Table 5: Number and attainment score of goals set

|                                                            |                          | Practice<br>1<br>(n = 10) | Practice<br>2<br>(n = 8) | Practice<br>3<br>(n = 4) | Total     |
|------------------------------------------------------------|--------------------------|---------------------------|--------------------------|--------------------------|-----------|
| Goals set                                                  |                          | 27                        | 16                       | 7                        | 50        |
| Number of goal per patient                                 | 1 goal set               | 0                         | 2                        | 1                        | 3         |
|                                                            | 2 goals set              | 3                         | 4                        | 3                        | 10        |
|                                                            | 3 goals set              | 7                         | 2                        | 0                        | 9         |
| Number of goals with data available for attainment scoring |                          | 21                        | 15                       | 6                        | 42        |
| Mean score of goal attainment per patient                  |                          | 1.43                      | 1.67                     | 1.0                      | 1.45      |
| Goal attainment n (%)                                      | worse than expected      | 1 (4.8)                   | 2 (13.3)                 | 1 (16.7)                 | 4 (9.5)   |
|                                                            | no change                | 4 (19.0)                  | 0 (0.0)                  | 2 (33.3)                 | 6 (14.3)  |
|                                                            | partially attained       | 9 (42.9)                  | 5 (33.3)                 | 1 (16.7)                 | 15 (35.7) |
|                                                            | as expected              | 2 (9.5)                   | 3 (20.0)                 | 1 (16.7)                 | 6 (14.3)  |
|                                                            | a little more            | 2 (9.5)                   | 4 (26.7)                 | 0 (0.0)                  | 6 (14.3)  |
|                                                            | a lot more than expected | 3 (14.3)                  | 1 (6.7)                  | 1 (16.7)                 | 5 (11.9)  |

n = number of participants

Table 6: Categories of goals set

| Goal categories                                      | Number of goals |
|------------------------------------------------------|-----------------|
| Management of chronic condition (non-medication)     | 9               |
| Walking-related                                      | 8               |
| Maintain interests                                   | 5               |
| Management of chronic condition (medication-related) | 5               |
| Gain weight                                          | 4               |
| Social participation                                 | 3               |
| Healthy living                                       | 3               |
| Balance/mobility                                     | 3               |
| Gardening-related                                    | 3               |
| Manual dexterity                                     | 3               |
| Mental health                                        | 2               |
| End of life management                               | 1               |
| Cooking/food preparation                             | 1               |
| Grand Total                                          | 50              |



1  
2  
3  
4  
5  
6  
7  
8  
9  
10  
11  
12  
13  
14  
15  
16  
17  
18  
19  
20  
21  
22  
23  
24  
25  
26  
27  
28  
29  
30  
31  
32  
33  
34  
35  
36  
37  
38  
39  
40  
41  
42  
43  
44  
45  
46  
47

Table 7: Change in outcome measures between groups

| Variable             | Change from baseline to follow-up mean (SD) |                     |    |              | Mean difference between goal-setting and usual care planning (95% CI) | p-value | Intraclass correlation coefficient (95% CI) |
|----------------------|---------------------------------------------|---------------------|----|--------------|-----------------------------------------------------------------------|---------|---------------------------------------------|
|                      | n                                           | Usual care planning | n  | Goal-setting |                                                                       |         |                                             |
| Number of medication | 28                                          | 0.29 (2.65)         | 23 | 1.04 (3.21)  | 0.76 (-0.85,2.37)                                                     | 0.356   | 0.00                                        |
| GPCOG                | 23                                          | -0.57 (2.02)        | 19 | -0.58 (2.63) | 0.09 (-1.65,1.84)                                                     | 0.918   | 0.08 (0.00,0.77)                            |
| PACIC                | 23                                          | 0.40 (0.69)         | 18 | 0.31 (0.98)  | -0.09 (-0.60,0.42)                                                    | 0.730   | 0.00                                        |
| EQ-5D-5L             | 23                                          | -0.02 (0.19)        | 18 | -0.01 (0.15) | 0.02 (-0.11,0.13)                                                     | 0.847   | 0.05 (0.00,0.94)                            |
| ICECAP-O             | 22                                          | 0.06 (0.14)         | 17 | -0.02 (0.06) | -0.08 (-0.15,-0.00)                                                   | 0.037   | 0.00                                        |

SD = standard deviation, GPCOG = General Practitioner assessment of Cognition, PACIC = Patients Assessment Chronic Illness Care, EQ-5Q-5L = 5 level EQ-5D, ICECAP-O = ICEpop CAPability measure for Older people, 95%CI = 95% confidence interval

Table 8: Costs associated with health care use in GoalPlan study

| Resource use             | 6-months prior to recruitment |                 |                     |                     |                 |                     | Recruitment to 6-month follow-up |                 |                     |                     |                 |                     |
|--------------------------|-------------------------------|-----------------|---------------------|---------------------|-----------------|---------------------|----------------------------------|-----------------|---------------------|---------------------|-----------------|---------------------|
|                          | Usual care planning           |                 |                     | Goal-setting        |                 |                     | Usual care planning              |                 |                     | Goal-setting        |                 |                     |
|                          | Total contacts<br>n           | Total cost<br>£ | Mean cost £<br>(SD) | Total contacts<br>n | Total cost<br>£ | Mean cost £<br>(SD) | Total contacts<br>n              | Total cost<br>£ | Mean cost £<br>(SD) | Total contacts<br>n | Total cost<br>£ | Mean cost £<br>(SD) |
| Community based services |                               |                 |                     |                     |                 |                     |                                  |                 |                     |                     |                 |                     |
| GP                       | 157                           | 4,636           | 166 (164)           | 89                  | 2,464           | 107 (115)           | 177                              | 5,150           | 184 (150)           | 124                 | 4,002           | 174 (145)           |
| Other practice based     | 97                            | 922             | 33 (42)             | 108                 | 1,080           | 47 (30)             | 152                              | 1,823           | 65 (58)             | 149                 | 1,529           | 66 (53)             |
| District Nurse           | 148                           | 3,582           | 128 (546)           | 198                 | 6,450           | 280 (1297)          | 100                              | 2,879           | 103 (321)           | 241                 | 7,450           | 324 (1384)          |
| Other                    | 72                            | 1,434           | 51 (132)            | 72                  | 2,601           | 113 (193)           | 189                              | 7,652           | 273 (355)           | 97                  | 5,510           | 240 (224)           |
| All community based      | 474                           | 10,575          | 378 (778)           | 467                 | 12,594          | 548 (1520)          | 618                              | 15,681          | 560 (719)           | 611                 | 16,962          | 737 (1537)          |
| Inpatient                | 4                             | 11,291          | 403 (1113)          | 16                  | 28,054          | 1220 (2584)         | 12                               | 35,055          | 1252 (2203)         | 13                  | 39,889          | 1734 (4815)         |
| Outpatient               | 45                            | 4,848           | 173 (208)           | 51                  | 7,381           | 321 (397)           | 41                               | 4,424           | 158 (202)           | 52                  | 6,295           | 274 (329)           |
| A&E                      | 1                             | 138             | 5 (26)              | 6                   | 826             | 36 (74)             | 15                               | 2,066           | 74 (109)            | 16                  | 2,204           | 96 (128)            |
| Total for all costs      |                               | 26,853          | 959 (1776)          |                     | 48,856          | 2124 (4031)         |                                  | 57,226          | 2044 (2665)         |                     | 65,349          | 2841 (4968)         |

SD = standard deviation, A&E = Accident and Emergency

Supplementary Table 1: Characteristics of those who participated compared with those who did not

|                      | Participation | Non-participation |
|----------------------|---------------|-------------------|
| Number               | 52            | 498               |
| Age mean (SD)        | 78.5 (9.0)    | 79.6 (12.2)       |
| Female %             | 46.2%         | 53.8%             |
| IMD decile mean (SD) | 5.8 (2.3)     | 5.3 (2.2)         |

SD = standard deviation, IMD = Index of Multiple Deprivation

For peer review only

Supplementary Table 2: Quality and Outcomes Framework data

|                                                   |                                                   | Goal-setting | Usual care planning |
|---------------------------------------------------|---------------------------------------------------|--------------|---------------------|
| BMI                                               | No of participants                                | 2            | 3                   |
|                                                   | Baseline mean (SD)                                | 28.4 (1.9)   | 37.8 (8.0)          |
|                                                   | Follow-up (mean, SD)                              | 28.5 (3.6)   | 37.0 (9.5)          |
|                                                   | Diff (mean, SD)                                   | 0.1 (1.7)    | -0.8 (2.7)          |
| BP, mmHg                                          | No of participants                                | 5            | 5                   |
|                                                   | Baseline systolic (mean, SD)                      | 133.5 (6.5)  | 127.5 (19.0)        |
|                                                   | Baseline diastolic (mean, SD)                     | 70.7 (4.4)   | 69.2 (5.5)          |
|                                                   | Follow-up systolic (mean, SD)                     | 144.7 (7.0)  | 124.4 (6.2)         |
|                                                   | Follow-up diastolic (mean, SD)                    | 80.6 (4.7)   | 67.1 (5.6)          |
|                                                   | Mean diff systolic (mean, SD)                     | 11.2 (12.6)  | -3.1 (14.4)         |
|                                                   | Mean diff diastolic (mean, SD)                    | 9.9 (3.1)    | -2.1 (8.7)          |
|                                                   | Baseline Qof target met (150/90)                  | 5/5          | 5/5                 |
|                                                   | Follow-up Qof target met (150/90)                 | 4/5          | 5/5                 |
| eGFR, mL/min/1,73m <sup>2</sup>                   | No of participants                                | 4            | 6                   |
|                                                   | Baseline (mean, SD)                               | 54 (14)      | 57 (24)             |
|                                                   | Follow-up (mean, SD)                              | 56 (17)      | 59 (25)             |
|                                                   | Mean diff (mean, SD)                              | 2 (5)        | 2 (3)               |
| HB1Ac, mmol/mol                                   | No of participants                                | 1            | 3                   |
|                                                   | Baseline (mean, SD)                               | 80 (NA)      | 39 (3)              |
|                                                   | Follow-up (mean, SD)                              | 87 (NA)      | 43 (6)              |
|                                                   | Mean diff (mean, SD)                              | 7 (NA)       | 4 (3)               |
|                                                   | Baseline Qof target met - Diabetes and HB1Ac <59  | 0/1          | 1/1                 |
|                                                   | Baseline Qof target met - Diabetes and HB1Ac <64  | 0/1          | 1/1                 |
|                                                   | Baseline Qof target met - Diabetes and HB1Ac <75  | 0/1          | 1/1                 |
|                                                   | Follow-up Qof target met - Diabetes and HB1Ac <59 | 0/1          | 1/1                 |
|                                                   | Follow-up Qof target met - Diabetes and HB1Ac <64 | 0/1          | 1/1                 |
| Follow-up Qof target met - Diabetes and HB1Ac <75 | 0/1                                               | 1/1          |                     |
| Total cholesterol, mg/dL                          | No of participants                                | 2            | 1                   |
|                                                   | Baseline (mean, SD)                               | 2.8 (0.7)    | 4.2 (NA)            |
|                                                   | Follow-up (mean, SD)                              | 3.9 (1.1)    | 4.9 (NA)            |
|                                                   | Mean diff (mean, SD)                              | 1.1 (0.5)    | 0.7 (NA)            |
| HDL cholesterol, mg/dL                            | No of participants                                | 2            | 0                   |
|                                                   | Baseline (mean, SD)                               | 0.84 (0.19)  | NA                  |
|                                                   | Follow-up (mean, SD)                              | 1.01 (0.4)   | NA                  |
|                                                   | Mean diff (mean, SD)                              | 0.17 (0.15)  | NA                  |

BMI = body mass index, SD= standard deviation, BP = blood pressure, eGFR = estimated glomerular filtration rate, HB1Ac = glycated haemoglobin, Qof = Quality and Outcomes Framework, HDL = High Density Lipoproteins, NA= not applicable

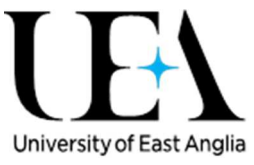

# BMJ Open GoalPlan Study: Goal-setting form

for completion before care plan appointment

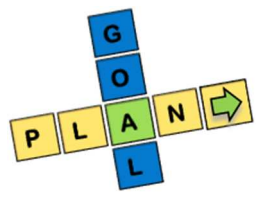

1  
2  
3  
4  
5  
6  
7  
8  
9  
10  
11  
12  
13  
14  
15  
16  
17  
18  
19  
20  
21  
22  
23  
24  
25  
26  
27  
28  
29  
30  
31  
32  
33  
34  
35  
36  
37  
38  
39  
40  
41  
42  
43  
44  
45  
46  
47

## Part 1) What are your goals? What is important to you?

Write down what you would really like to do or achieve over the next 6 months, even if you think it may not be related to your health. Think about things that you would like to do in your personal, home, work, and social life—things that you **need** to do, **want** to do and / or **enjoy doing**. Then list them in order of priority— starting with 1 for the goal that matters to you most and that you would like to focus on at the moment. To help you, we have put a completed example overleaf.

**What do you really want to achieve over the next 6 months? (your goals)**

---

1  
2  
3  
4  
5  
6  
7  
8  
9  
10  
11  
12  
13  
14  
15  
16  
17  
18  
19  
20  
21  
22  
23  
24  
25  
26  
27  
28  
29  
30  
31  
32  
33  
34  
35  
36  
37  
38  
39  
40  
41  
42  
43  
44  
45  
46  
47

Example

- *I want to be able to do more in the garden as it relaxes me*
- *I want to lose weight so I can walk more confidently at my daughter's wedding and fit into my favourite outfit again*
- *I want to be able to get more exercise as it used to help me sleep well*
- *I want to get back to driving so I can visit my friend at his house every week*
- *I want to be able to go out with friends once a week again for lunch*

### Part 2) Why are these goals important to you?

We now ask you to focus on your goals from Part 1, and to think about why they are important to you. Below is an example of how to find out if a goal you have come up with is important for its own sake, or if it is important because it will help you achieve something else. We ask you to do this exercise with up to three of your goals overleaf.

### Part 3) What are the first steps you would like to take towards achieving this goal or goals?

Having identified your most important goals, the final step on this form is to start thinking about steps you would like to take to achieve those goals. This is also included in the example below. Please do the same for your goals overleaf.

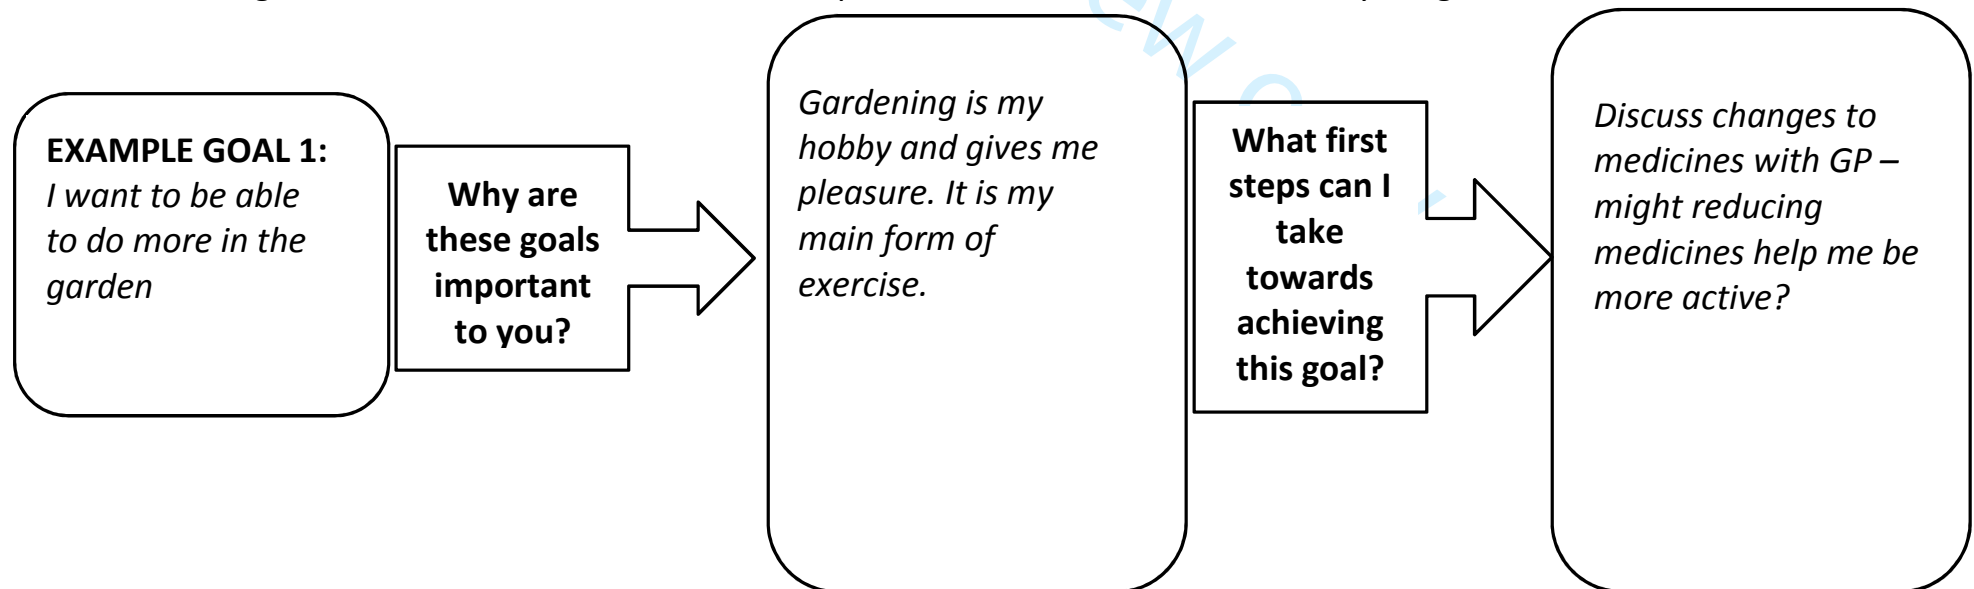

1  
2  
3  
4  
5  
6  
7  
8  
9  
10  
11  
12  
13  
14  
15  
16  
17  
18  
19  
20  
21  
22  
23  
24  
25  
26  
27  
28  
29  
30  
31  
32  
33  
34  
35  
36  
37  
38  
39  
40  
41  
42  
43  
44  
45  
46  
47

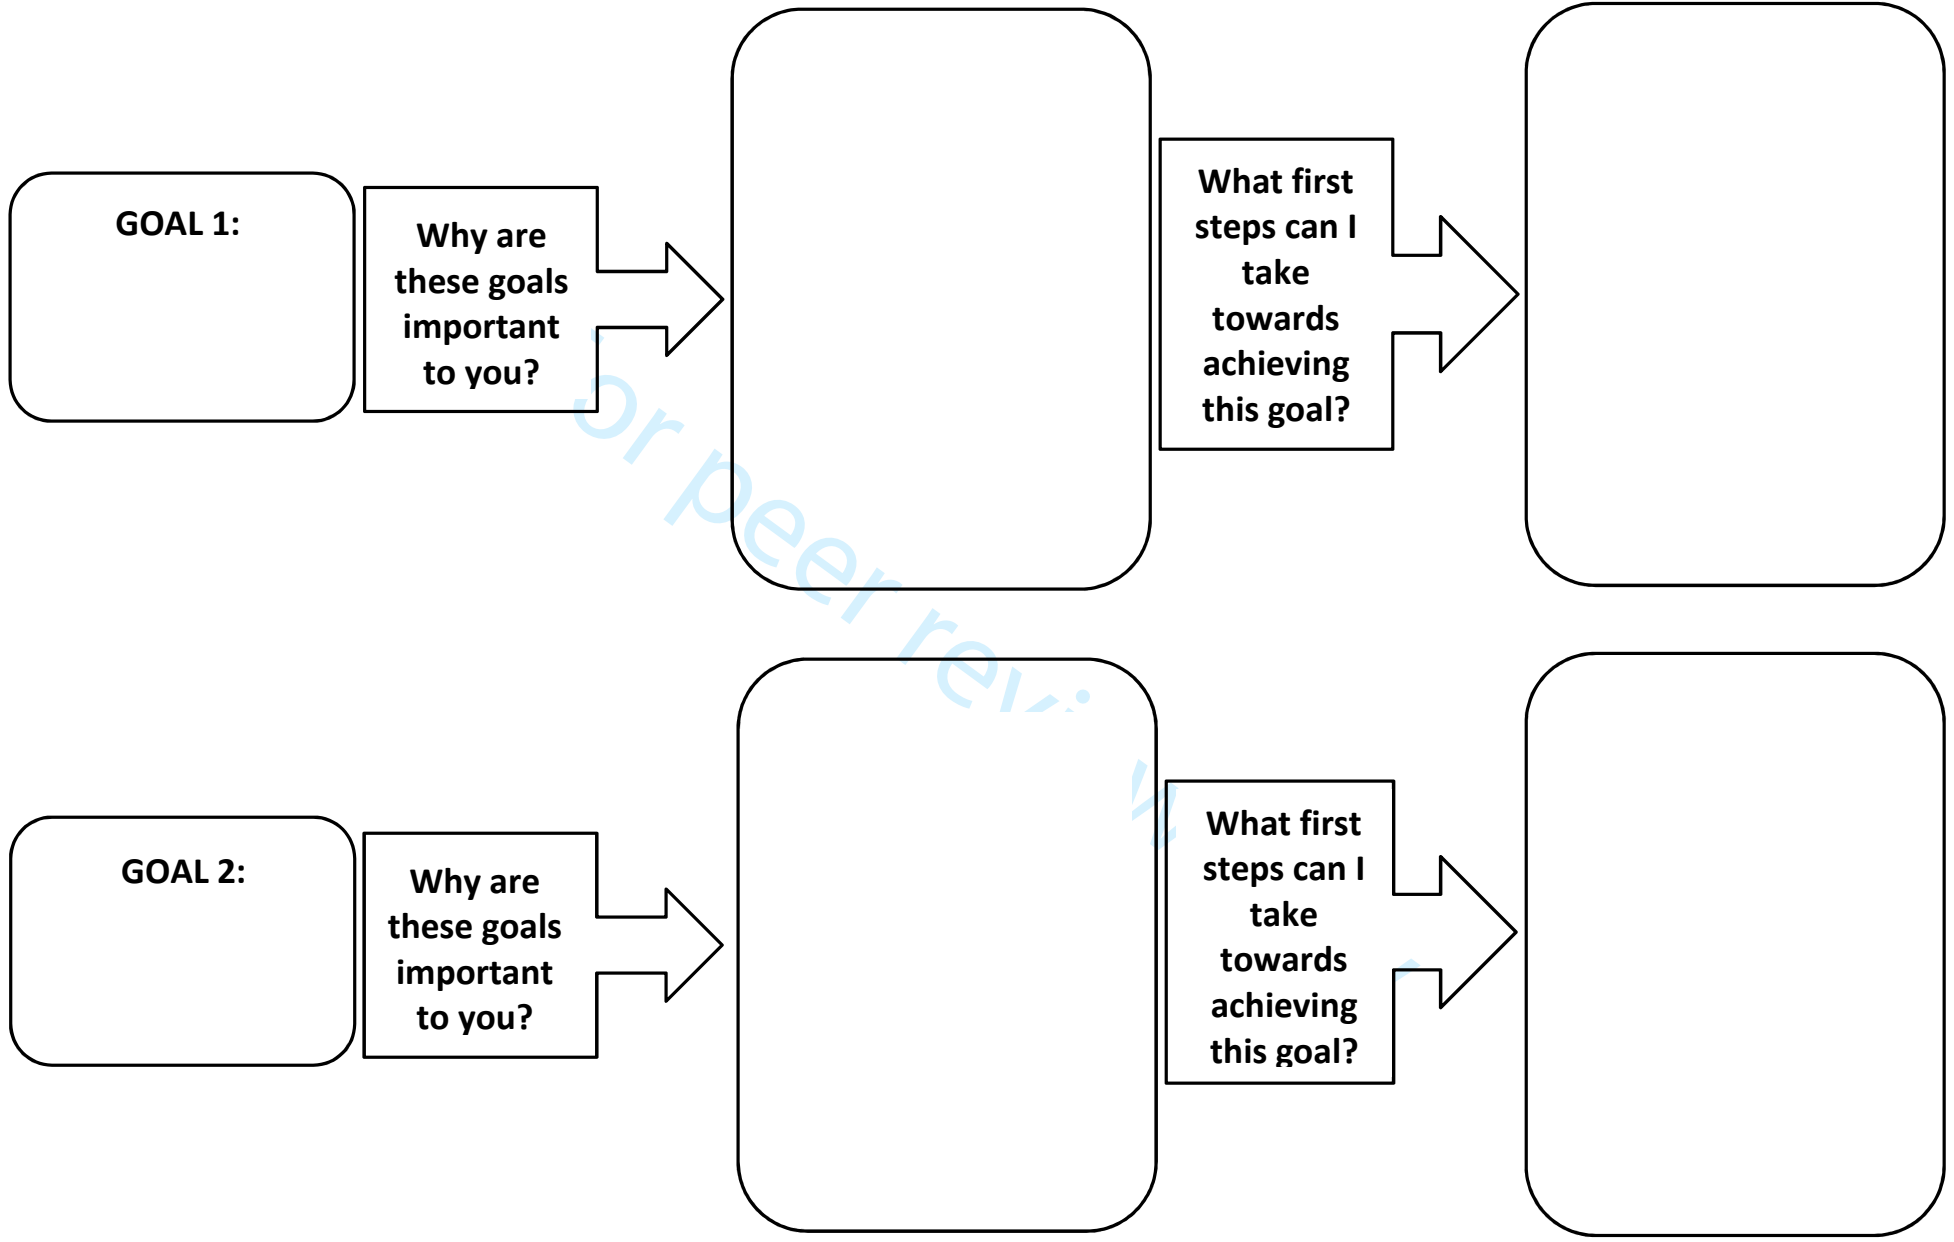

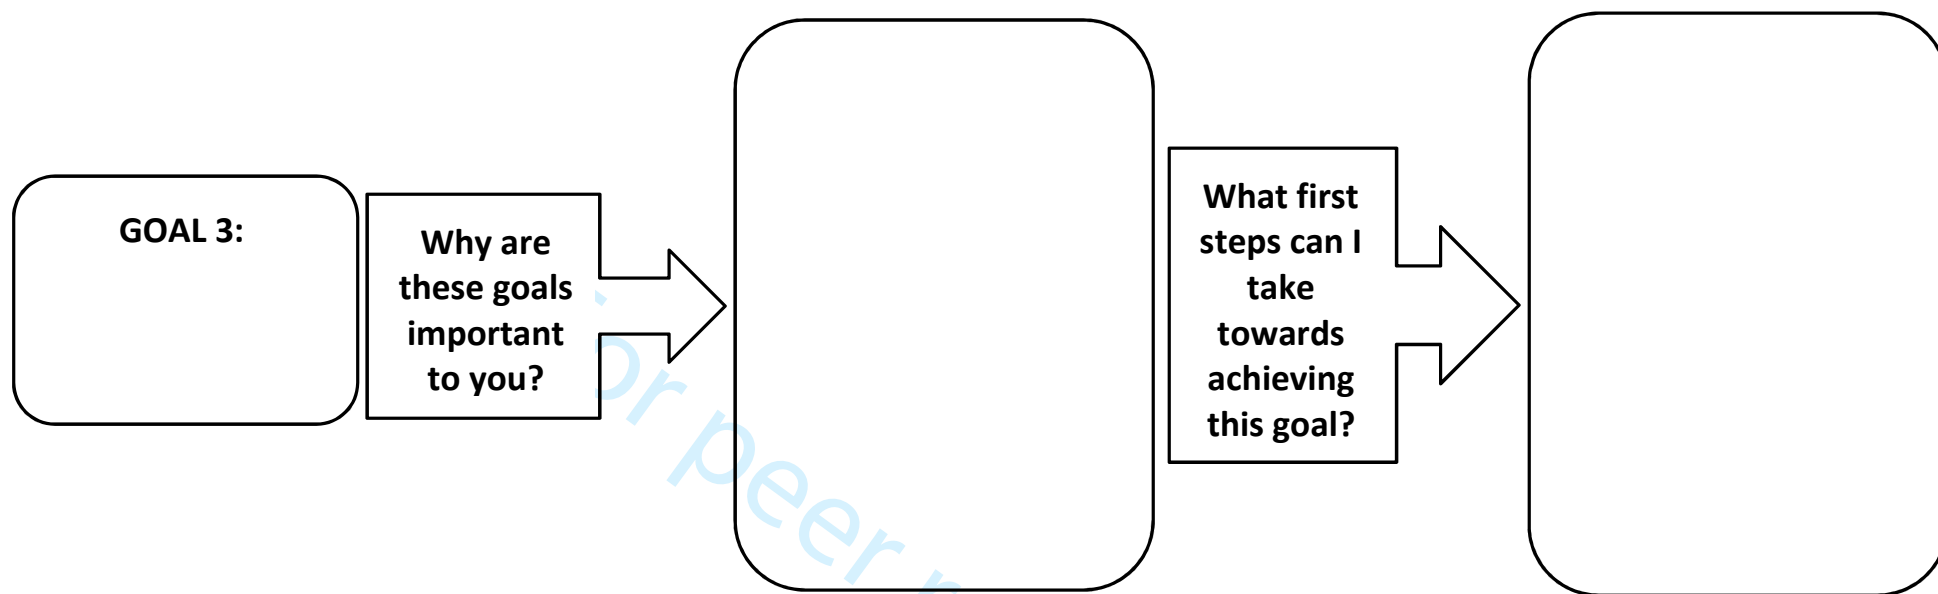

**Thank you for completing this goal-setting form. Please take it with you to your care plan appointment. Your GP will discuss it with you and together you will make specific plans to achieve your goals.**



# GoalPlan Study

## GAS-Light verbal scoring system

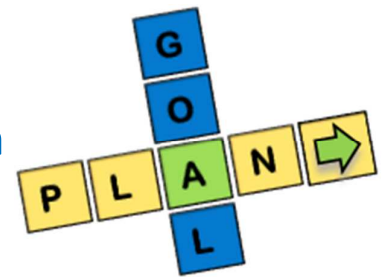

| Goal 1:                   |                                                                                        |                                                                                        | Tick                     |                          |
|---------------------------|----------------------------------------------------------------------------------------|----------------------------------------------------------------------------------------|--------------------------|--------------------------|
| <b>At Baseline</b>        | With respect to this goal do they have?                                                | Some attainment                                                                        | <input type="checkbox"/> |                          |
|                           |                                                                                        | No attainment<br>(as bad as they could be)                                             | <input type="checkbox"/> |                          |
| <b>At 6 month review:</b> | Yes 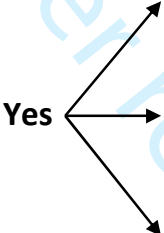 | A lot more                                                                             | <input type="checkbox"/> |                          |
|                           |                                                                                        | A little more                                                                          | <input type="checkbox"/> |                          |
|                           |                                                                                        | As expected                                                                            | <input type="checkbox"/> |                          |
|                           | Was the goal attained?                                                                 | No  | Partially attained       | <input type="checkbox"/> |
|                           |                                                                                        |                                                                                        | No change                | <input type="checkbox"/> |
|                           |                                                                                        |                                                                                        | Got worse                | <input type="checkbox"/> |

PTO for further goals

|                                                         |                                         |                                            |                          |
|---------------------------------------------------------|-----------------------------------------|--------------------------------------------|--------------------------|
| <b>Goal 2:</b>                                          |                                         |                                            | Tick                     |
| <b>At Baseline</b>                                      | With respect to this goal do they have? | Some attainment                            | <input type="checkbox"/> |
|                                                         |                                         | No attainment<br>(as bad as they could be) | <input type="checkbox"/> |
| <b>At 6 month review:</b><br><br>Was the goal attained? | Yes                                     | A lot more                                 | <input type="checkbox"/> |
|                                                         |                                         | A little more                              | <input type="checkbox"/> |
|                                                         |                                         | As expected                                | <input type="checkbox"/> |
|                                                         | No                                      | Partially attained                         | <input type="checkbox"/> |
|                                                         |                                         | No change                                  | <input type="checkbox"/> |
|                                                         |                                         | Got worse                                  | <input type="checkbox"/> |

PTO for further goals

|                                                         |                                                                                        |                                            |                          |
|---------------------------------------------------------|----------------------------------------------------------------------------------------|--------------------------------------------|--------------------------|
| <b>Goal 3:</b>                                          |                                                                                        |                                            | Tick                     |
| <b>At Baseline</b>                                      | With respect to this goal do they have?                                                | Some attainment                            | <input type="checkbox"/> |
|                                                         |                                                                                        | No attainment<br>(as bad as they could be) | <input type="checkbox"/> |
| <b>At 6 month review:</b><br><br>Was the goal attained? | Yes 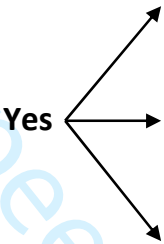  | A lot more                                 | <input type="checkbox"/> |
|                                                         |                                                                                        | A little more                              | <input type="checkbox"/> |
|                                                         |                                                                                        | As expected                                | <input type="checkbox"/> |
|                                                         | No  | Partially attained                         | <input type="checkbox"/> |
|                                                         |                                                                                        | No change                                  | <input type="checkbox"/> |
|                                                         |                                                                                        | Got worse                                  | <input type="checkbox"/> |

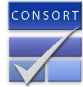

## CONSORT 2010 checklist of information to include when reporting a pilot or feasibility trial\*

| Section/Topic                    | Item No | Checklist item                                                                                                                                                                              | Reported on page No |
|----------------------------------|---------|---------------------------------------------------------------------------------------------------------------------------------------------------------------------------------------------|---------------------|
| <b>Title and abstract</b>        |         |                                                                                                                                                                                             |                     |
|                                  | 1a      | Identification as a pilot or feasibility randomised trial in the title                                                                                                                      | 1                   |
|                                  | 1b      | Structured summary of pilot trial design, methods, results, and conclusions (for specific guidance see CONSORT abstract extension for pilot trials)                                         | 2                   |
| <b>Introduction</b>              |         |                                                                                                                                                                                             |                     |
| Background and objectives        | 2a      | Scientific background and explanation of rationale for future definitive trial, and reasons for randomised pilot trial                                                                      | 4                   |
|                                  | 2b      | Specific objectives or research questions for pilot trial                                                                                                                                   | 4                   |
| <b>Methods</b>                   |         |                                                                                                                                                                                             |                     |
| Trial design                     | 3a      | Description of pilot trial design (such as parallel, factorial) including allocation ratio                                                                                                  | 5                   |
|                                  | 3b      | Important changes to methods after pilot trial commencement (such as eligibility criteria), with reasons                                                                                    | 5                   |
| Participants                     | 4a      | Eligibility criteria for participants                                                                                                                                                       | 5                   |
|                                  | 4b      | Settings and locations where the data were collected                                                                                                                                        | 5                   |
|                                  | 4c      | How participants were identified and consented                                                                                                                                              | 5                   |
| Interventions                    | 5       | The interventions for each group with sufficient details to allow replication, including how and when they were actually administered                                                       | 5-6                 |
| Outcomes                         | 6a      | Completely defined prespecified assessments or measurements to address each pilot trial objective specified in 2b, including how and when they were assessed                                | 6                   |
|                                  | 6b      | Any changes to pilot trial assessments or measurements after the pilot trial commenced, with reasons                                                                                        | 5                   |
|                                  | 6c      | If applicable, prespecified criteria used to judge whether, or how, to proceed with future definitive trial                                                                                 | NA                  |
| Sample size                      | 7a      | Rationale for numbers in the pilot trial                                                                                                                                                    | 5                   |
|                                  | 7b      | When applicable, explanation of any interim analyses and stopping guidelines                                                                                                                | NA                  |
| Randomisation:                   |         |                                                                                                                                                                                             |                     |
| Sequence generation              | 8a      | Method used to generate the random allocation sequence                                                                                                                                      | 5                   |
|                                  | 8b      | Type of randomisation(s); details of any restriction (such as blocking and block size)                                                                                                      | 5                   |
| Allocation concealment mechanism | 9       | Mechanism used to implement the random allocation sequence (such as sequentially numbered containers), describing any steps taken to conceal the sequence until interventions were assigned | 5                   |

|                                                      |     |                                                                                                                                                                                       |                   |
|------------------------------------------------------|-----|---------------------------------------------------------------------------------------------------------------------------------------------------------------------------------------|-------------------|
| Implementation                                       | 10  | Who generated the random allocation sequence, who enrolled participants, and who assigned participants to interventions                                                               | 5                 |
| Blinding                                             | 11a | If done, who was blinded after assignment to interventions (for example, participants, care providers, those assessing outcomes) and how                                              | NA                |
|                                                      | 11b | If relevant, description of the similarity of interventions                                                                                                                           | NA                |
| Statistical methods                                  | 12  | Methods used to address each pilot trial objective whether qualitative or quantitative                                                                                                | 6                 |
| <b>Results</b>                                       |     |                                                                                                                                                                                       |                   |
| Participant flow (a diagram is strongly recommended) | 13a | For each group, the numbers of participants who were approached and/or assessed for eligibility, randomly assigned, received intended treatment, and were assessed for each objective | Figure 1          |
|                                                      | 13b | For each group, losses and exclusions after randomisation, together with reasons                                                                                                      | Figure 1          |
| Recruitment                                          | 14a | Dates defining the periods of recruitment and follow-up                                                                                                                               | 6                 |
|                                                      | 14b | Why the pilot trial ended or was stopped                                                                                                                                              | NA                |
| Baseline data                                        | 15  | A table showing baseline demographic and clinical characteristics for each group                                                                                                      | Table 3           |
| Numbers analysed                                     | 16  | For each objective, number of participants (denominator) included in each analysis. If relevant, these numbers should be by randomised group                                          | Tables 4, 5 and 7 |
| Outcomes and estimation                              | 17  | For each objective, results including expressions of uncertainty (such as 95% confidence interval) for any estimates. If relevant, these results should be by randomised group        | Table 7           |
| Ancillary analyses                                   | 18  | Results of any other analyses performed that could be used to inform the future definitive trial                                                                                      | NA                |
| Harms                                                | 19  | All important harms or unintended effects in each group (for specific guidance see CONSORT for harms)                                                                                 | 9                 |
|                                                      | 19a | If relevant, other important unintended consequences                                                                                                                                  | NA                |
| <b>Discussion</b>                                    |     |                                                                                                                                                                                       |                   |
| Limitations                                          | 20  | Pilot trial limitations, addressing sources of potential bias and remaining uncertainty about feasibility                                                                             | 11-12             |
| Generalisability                                     | 21  | Generalisability (applicability) of pilot trial methods and findings to future definitive trial and other studies                                                                     | 11-12             |
| Interpretation                                       | 22  | Interpretation consistent with pilot trial objectives and findings, balancing potential benefits and harms, and considering other relevant evidence                                   | 11-12             |
|                                                      | 22a | Implications for progression from pilot to future definitive trial, including any proposed amendments                                                                                 | 11-12             |
| <b>Other information</b>                             |     |                                                                                                                                                                                       |                   |
| Registration                                         | 23  | Registration number for pilot trial and name of trial registry                                                                                                                        | 1                 |
| Protocol                                             | 24  | Where the pilot trial protocol can be accessed, if available                                                                                                                          | 1                 |
| Funding                                              | 25  | Sources of funding and other support (such as supply of drugs), role of funders                                                                                                       | 13                |
|                                                      | 26  | Ethical approval or approval by research review committee, confirmed with reference number                                                                                            | 5                 |

1  
2 Citation: Eldridge SM, Chan CL, Campbell MJ, Bond CM, Hopewell S, Thabane L, et al. CONSORT 2010 statement: extension to randomised pilot and feasibility trials. BMJ. 2016;355.

3 \*We strongly recommend reading this statement in conjunction with the CONSORT 2010, extension to randomised pilot and feasibility trials, Explanation and Elaboration for important  
4 clarifications on all the items. If relevant, we also recommend reading CONSORT extensions for cluster randomised trials, non-inferiority and equivalence trials, non-pharmacological  
5 treatments, herbal interventions, and pragmatic trials. Additional extensions are forthcoming: for those and for up to date references relevant to this checklist, see [www.consort-statement.org](http://www.consort-statement.org).  
6  
7  
8  
9  
10  
11  
12  
13  
14  
15  
16  
17  
18  
19  
20  
21  
22  
23  
24  
25  
26  
27  
28  
29  
30  
31  
32  
33  
34  
35  
36  
37  
38  
39  
40  
41  
42  
43  
44  
45  
46  
47

For peer review only

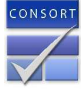

## CONSORT 2010 checklist of information to include when reporting a pilot or feasibility randomized trial in a journal or conference abstract

| Item               | Description                                                                                                 | Reported on line number |
|--------------------|-------------------------------------------------------------------------------------------------------------|-------------------------|
| Title              | Identification of study as randomised pilot or feasibility trial                                            | 1                       |
| Authors *          | Contact details for the corresponding author                                                                | 1                       |
| Trial design       | Description of pilot trial design (eg, parallel, cluster)                                                   | 2                       |
| Methods            |                                                                                                             |                         |
| Participants       | Eligibility criteria for participants and the settings where the pilot trial was conducted                  | 2                       |
| Interventions      | Interventions intended for each group                                                                       | 2                       |
| Objective          | Specific objectives of the pilot trial                                                                      | 2                       |
| Outcome            | Prespecified assessment or measurement to address the pilot trial objectives**                              | 2                       |
| Randomization      | How participants were allocated to interventions                                                            | 2                       |
| Blinding (masking) | Whether or not participants, care givers, and those assessing the outcomes were blinded to group assignment | 2                       |
| Results            |                                                                                                             |                         |
| Numbers randomized | Number of participants screened and randomised to each group for the pilot trial objectives**               | 2                       |
| Recruitment        | Trial status†                                                                                               |                         |
| Numbers analysed   | Number of participants analysed in each group for the pilot objectives**                                    | 2                       |
| Outcome            | Results for the pilot objectives, including any expressions of uncertainty**                                | 2                       |
| Harms              | Important adverse events or side effects                                                                    | 2                       |
| Conclusions        | General interpretation of the results of pilot trial and their implications for the future definitive trial | 2                       |
| Trial registration | Registration number for pilot trial and name of trial register                                              | 1                       |
| Funding            | Source of funding for pilot trial                                                                           | 13                      |

Citation: Eldridge SM, Chan CL, Campbell MJ, Bond CM, Hopewell S, Thabane L, et al. CONSORT 2010 statement: extension to randomised pilot and feasibility trials. *BMJ*. 2016;355.

*\*this item is specific to conference abstracts*

*\*\*Space permitting, list all pilot trial objectives and give the results for each. Otherwise, report those that are a priori agreed as the most important to the decision to proceed with the future definitive RCT.*

*†For conference abstracts.*

# BMJ Open

## Can goal-setting for patients with multimorbidity improve outcomes in primary care?: cluster randomised feasibility trial

|                                 |                                                                                                                                                                                                                                                                                                                                                                                                                                                                                                                                                                                                                                                                                                                                                   |
|---------------------------------|---------------------------------------------------------------------------------------------------------------------------------------------------------------------------------------------------------------------------------------------------------------------------------------------------------------------------------------------------------------------------------------------------------------------------------------------------------------------------------------------------------------------------------------------------------------------------------------------------------------------------------------------------------------------------------------------------------------------------------------------------|
| Journal:                        | <i>BMJ Open</i>                                                                                                                                                                                                                                                                                                                                                                                                                                                                                                                                                                                                                                                                                                                                   |
| Manuscript ID                   | bmjopen-2018-025332.R1                                                                                                                                                                                                                                                                                                                                                                                                                                                                                                                                                                                                                                                                                                                            |
| Article Type:                   | Research                                                                                                                                                                                                                                                                                                                                                                                                                                                                                                                                                                                                                                                                                                                                          |
| Date Submitted by the Author:   | 20-Nov-2018                                                                                                                                                                                                                                                                                                                                                                                                                                                                                                                                                                                                                                                                                                                                       |
| Complete List of Authors:       | Ford, John; University of East Anglia, Public Health<br>Lenaghan, E; University of East Anglia<br>Salter, Charlotte; University of East Anglia<br>Turner, David; University of East Anglia, Public Health and Primary Care<br>Shiner, A.; University of East Anglia<br>Clark, Allan; Norwich Medical School<br>Murdoch, Jamie; University of East Anglia, School of Nursing Sciences<br>Green, Carole<br>Lipp, Alistair; NHS England Midlands & East,, West Wing<br>Moseley, Annie<br>Wade, Tom; University of East Anglia<br>Winterburn, Sandra; University of East Anglia<br>Koopmans, Imogen; University of East Anglia, Public Health<br>James, Sarah; University of East Anglia, Public Health<br>Steel, Nicholas; University of East Anglia |
| <b>Primary Subject Heading</b>: | Public health                                                                                                                                                                                                                                                                                                                                                                                                                                                                                                                                                                                                                                                                                                                                     |
| Secondary Subject Heading:      | General practice / Family practice                                                                                                                                                                                                                                                                                                                                                                                                                                                                                                                                                                                                                                                                                                                |
| Keywords:                       | PRIMARY CARE, HEALTH SERVICES ADMINISTRATION & MANAGEMENT, SOCIAL MEDICINE                                                                                                                                                                                                                                                                                                                                                                                                                                                                                                                                                                                                                                                                        |
|                                 |                                                                                                                                                                                                                                                                                                                                                                                                                                                                                                                                                                                                                                                                                                                                                   |

SCHOLARONE™  
Manuscripts



**Title**

**Can goal-setting for patients with multimorbidity improve outcomes in primary care?: cluster randomised feasibility trial**

**Authors**

John A. Ford, Elizabeth Lenaghan, Charlotte Salter, David A. Turner, Alice Shiner, Allan Clark, Jamie Murdoch, Carole Green, Alistair Lipp, Annie Moseley, Tom Wade, Sandra Winterburn, Imogen Koopmans, Sarah James, Nicholas Steel

**Corresponding author**

Prof Nicholas Steel

Norwich Medical School  
University of East Anglia  
Chancellor's Drive  
Norwich  
NR4 7TJ  
[n.steel@uea.ac.uk](mailto:n.steel@uea.ac.uk)  
01603 591161

*Trials registration:*

Title: Goal-setting in care planning for people with multimorbidity

Trial ID: ISRCTN13248305

Date registered: 21/12/2016

Link: <http://www.isrctn.com/ISRCTN13248305>

*Protocol: Available at:*

<http://www.uea.ac.uk/documents/246046/14839702/GoalPlan+Research+Protocol+v1.2+170316.pdf/86549c5b-c4ed-435b-8719-4c3160f9793f>

*Word count: 5219 words*

*Keywords:* goals, multimorbidity, primary health care, patient-centred care, randomized controlled trial

## Abstract

### Introduction

Goal-setting is recommended for patients with multimorbidity, but there is little evidence to support its use in general practice.

### Objective

To assess the feasibility of goal-setting for patients with multimorbidity, before undertaking a definitive trial.

### Design and setting

Cluster-randomised controlled feasibility trial of goal-setting compared to control in six general practices.

### Participants

Adults with 2 or more long term health conditions and at risk of unplanned hospital admission.

### Interventions

General Practitioners (GPs) underwent training and patients were asked to consider goals before an initial goal-setting consultation and a follow-up consultation six months later. The control group received usual care planning.

### Outcome measures

Health-related quality of life (EQ5D5L), capability (ICEpop CAPability measure for Older people (ICECAP-O)), patient assessment of chronic illness care (PACIC) and health care use. All consultations were video or audio-recorded, and focus groups were held with participating GPs and patients.

### Results

Fifty-two participants were recruited with a response rate of 12%. Full follow-up data were available for 41. In the goal-setting group, mean age was 80.4 years, 54% were female and the median number of prescribed medications was 13, compared to 77.2 years, 39% female and 11.5 medications in the control group. The mean initial consultation time was 23.0 minutes in the goal-setting group and 19.2 in the control group. Overall 28% of patient participants had no cognitive impairment. Participants set between one and three goals on a wide range of subjects, such as chronic disease management, walking, maintaining social and leisure interests, and weight management. Patient participants found goal-setting acceptable and would have liked more frequent follow-up. GPs unanimously liked goal-setting, felt it delivered more patient-centred care and highlighted the importance of training.

### Conclusions

This goal-setting intervention was feasible to deliver in general practice. A larger, definitive study is needed to test its effectiveness.

### Strengths and limitations of this study

- General practitioners and patients with multimorbidities both benefit from preparation before setting goals
- Recruitment reached target levels in five of six practices, but the patient response rate of 12% means that a definitive study will need sufficient numbers of patients with multimorbidity
- Existing measures of patient centred care are usually designed for a single specific treatment decision and were difficult to apply to goal setting consultations, where several goals were discussed
- The most relevant outcome measure for goal setting was the patient assessment of chronic illness care (PACIC), which includes a sub-scale for goal setting
- Qualitative data from video-recorded consultations and focus groups were vital to understand how goal-setting was implemented in practice, and how acceptable it was to GPs and patients.

## Introduction

The rising number of long-term conditions and prescribed medications has increased the burden of treatment for patients [1 2]. People with multimorbidity (defined as two or more chronic conditions [2]) tend to have a lower quality of life and worse health than those with single conditions [3]. Medical outcomes that work well for relatively healthy patients (e.g. blood pressure control, or disease-free survival) may be inappropriate for patients with multimorbidity or severe disability [4 5], and the use of current single-disease guidelines in this group can encourage harmful polypharmacy with resulting drug-drug and drug-disease interactions [6].

The National Institute for Health and Care Excellence (NICE) recommends an approach to care that takes account of multimorbidity by establishing patient goals, values and priorities [7]. Goal setting is the sharing of realistic goals by health professionals and patients and agreement of the best course of action [8]. Goal setting enables patients and doctors to focus health care on the outcomes that are most important to the patient. Examples of outcomes that matter to patients may include maintaining independence, undertaking paid or voluntary work, preventing adverse outcomes (e.g. falls) and reducing treatment burden [7]. Despite the recommendation, there is little evidence to support the use of goal-setting between general practitioners and patients, and it is rarely used in primary care [8-10]. Goal setting should include shared decision making, the process by which health professionals and patients make decisions together based on the best available evidence [11], because both involve partnership working, choices, options and decisions. The difference is that shared decision making is usually concerned with specific clinical treatment decisions, whereas goal setting usually involves a wider discussion around ways to deliver outcomes that matter to the patient.

Goal-setting should be, but is not always, an important element of care planning. Care planning may be defined as 'a conversation in which patients and clinicians agree on goals and actions for managing the patient's conditions' [8]. For patients with long term health conditions, personalised care planning has been found to improve physical and psychological health, in addition improving capability to self-manage, compared to usual care [8]. A recent systematic review highlighted the need for evidence exploring 'the effects of personalised care planning on goal-attainment, especially patient's personal goals as opposed to goals determined by clinicians or researchers' [12].

Our goal-setting intervention was designed within the context of a national recommendation that the top 2% of patients at risk of unplanned hospital admission should have a care plan [13]. We wanted to find out if a consultation focussed on goal-setting would improve outcomes for this patient group, compared to control (usual care planning) consultations. Before we could conduct a full trial to answer this question, we needed to answer questions about the feasibility of such a trial. We aimed to assess the feasibility of goal-setting for patients with multimorbidity, at high risk of hospital admission and eligible for a care planning consultation, with a view to undertaking a future definitive randomised controlled trial. Our objectives were to assess participant recruitment and retention, the acceptability of a goal-setting intervention to patients and GPs, the training needs of GPs, the content of control consultations, goal-setting and the feasibility of collecting relevant outcome measures.

## Methods

We undertook a cluster randomised controlled feasibility trial of goal-setting compared to usual care in six general practices in the United Kingdom, with six months follow-up. Six months was long enough for patients and GPs to work towards the agreed goals, but not so long that the goals would have been forgotten. There were no significant changes to the protocol [14]. Research ethics approval was obtained from the NHS Research Ethics Committee (16/EM/0411). Participants were recruited between April and May 2017 and follow-up completed in February 2018.

General practices were invited via two emails through the East of England Clinical Research Network and recruited on a first-come first-served basis. To be eligible, practices had to be using risk stratification to identify patients at high risk of unplanned admission (for example by participating in the Avoiding Unplanned Admissions Enhanced Service [13]), have at least one Good Clinical Practice trained GP and nurse, be available to attend the goal-setting training and not be a single handed practice. Practices were reimbursed for staff time and travel to undertake the research and deliver the intervention. Patients were eligible if they were aged 18 or over, identified as in the top 2% for risk of unplanned admission and diagnosed with at least two of 40 morbidities in Barnett's analysis of multimorbidity [2]. Patients were excluded if they were deemed to be unable to participate in goal-setting in the GP's professional opinion (e.g. advanced dementia or acute psychosis), had received a care planning consultation in the previous three months, or required translation services to communicate verbally.

Practice administrators searched their electronic patient register according to the eligibility criteria, and a GP then checked the resulting patient list for exclusion criteria. Eligible patients were sent a letter of invitation and participant information leaflet, with the intention of recruiting 10 patients per practice. The number of eligible patients ranged from 47 to 124 and all were invited. The protocol allowed GPs to opportunistically invite patients they thought might be interested, however no patients were recruited through this process. A study researcher visited interested patients at home to discuss the study and obtain written informed consent.

The Norwich Clinical Trials Unit independently randomised three practices to goal-setting and three to control, by simple block randomisation using a 1:1 ratio and sealed opaque envelopes. Practices were randomised after at least 10 expressions of interest were received from patients. It was not possible to blind participants, health professionals or researchers due to the nature of the intervention, with the exception of the statistician undertaking the analysis, who was blinded to the allocation.

### *Intervention*

All five participating GPs from practices allocated to goal-setting (see Table 1) received training in a three hour experiential workshop, led by senior consultation skills tutors (CS and SW) and a GP with experience in communication skills training (AS). One other GP attended the training but withdrew prior to delivering the intervention for personal reasons. The training model we developed for goal setting adapted relevant elements of the work of Elwyn and colleagues on shared decision making [15 16] and of patient-centred care in the leading training model in clinical communication (the Calgary Cambridge Guide [17]). Our model adopted a structured, patient-centred stepped approach. Steps included preparation, goal elicitation, assessing options, making goals smart, decision-making and evaluation. Following an introduction to the study, the training was mainly experiential to enable GPs to rehearse existing skills and integrate additional skills for facilitating the goal-setting

1  
2  
3 process. Experiential methods included role-play, video analysis and interactive skill spotting . GPs  
4 were trained in groups of three and were given a detailed handbook in advance. The handbook  
5 contained information about the study and a “how to” guide for goal-setting, including theoretical  
6 background and examples of goal setting. The control group GPs received no training for this study  
7 and were asked to undertake a care planning consultation as they would usually do in routine clinical  
8 practice.  
9

10  
11 A study researcher discussed goal-setting and the associated paperwork with participants during the  
12 face-to-face baseline visit, which lasted approximately 15 minutes. The researcher gave all patient  
13 participants a patient-held goal-setting sheet (PGS), with three questions to consider prior to their  
14 consultation. The questions (Supplementary Appendix 1) were:

- 15 • What are your goals? What is important to you? What do you really want to achieve over  
16 the next six months?
- 17 • Why are these goals important to you?
- 18 • What are the first steps you would like to take towards achieving this goal or goals?  
19

20  
21  
22 The goal-setting consultations were held with the participating GPs even if they were different from  
23 the patient’s usual GP. During the initial goal-setting consultation GPs, in partnership with  
24 participants, documented the goals which had been agreed. GPs then provided support, within their  
25 clinical expertise and with the help of other health care professionals, to help patients achieve their  
26 goals, for example by providing information on local groups and services. Participants in both the  
27 goal-setting and control groups had an initial consultation which lasted about 20 minutes, but only  
28 patients in the goal-setting arm were invited back for a follow-up consultation after six months to  
29 discuss their goal attainment.  
30  
31

### 32 *Data and statistical analysis*

33  
34 We collected quantitative and qualitative data to meet the feasibility study objectives. Data were  
35 collected from patients during a researcher visit at baseline and six months were: health-related  
36 quality of life (EQ-5D-5L [18]); capability (as measured through the five attributes of attachment,  
37 security, role, enjoyment and control in the ICEpop CAPability measure for Older people  
38 questionnaire (ICECAP-O) [19])(ICEPOP is the name of the UK MRC-funded programme through  
39 which the index was developed), cognition (general practitioner assessment of cognition scale (GP-  
40 COG) [20]) and patient centred care (patient assessment of care for chronic conditions scale (PACIC)  
41 [21]). Data collected from the electronic patient record included age, sex and postcode Index of  
42 Multiple Deprivation (IMD) score (baseline only), medications on repeat prescription, diagnoses,  
43 achievement of relevant quality of care indicators in the Quality and Outcomes Framework [22] and  
44 primary and secondary care use (see health economic section below for more details). Practice data  
45 were collected before randomisation and patient data were collected after.  
46  
47  
48

49  
50 GPs and patient participants were asked to complete an assessment of shared decision making  
51 during each consultation using the CollaborATE scale [23] for patients and dyadic OPTION scale [24]  
52 for GPs. GPs and patients in the goal-setting group were asked to discuss and complete a goal  
53 attainment scaling (GAS-Light) questionnaire [25] (See Supplementary Appendix 2) at the second  
54 consultation. Goal attainment was scored using the following system: -1 = worse than expected, 0 =  
55 no change, 1 = partially attained, 2 = as expected, 3 = a little more and 4 = a lot more than expected.  
56  
57

58 All initial consultations were video (n=41) or audio recorded (n=4) and transcribed. Three team  
59 members scored the consultations using the observer OPTION measure to assess shared decision  
60 making [26]. One focus group was held with patients and one with GPs from the goal-setting group

1  
2  
3 at the end of the six month follow-up period to discuss perspectives, experiences and overall  
4 acceptability of the goal-setting intervention. All patients in the intervention group were sent a letter  
5 of invitation to the focus group, except two who indicated at the researcher visit they did not want  
6 to take part. Both focus groups lasted about 90 minutes, were held at the university, guided by a  
7 topic guide, audio-recorded and transcribed. Patient or GP participants unable to attend the focus  
8 groups were interviewed by phone or face-to-face using the same topic guide.  
9  
10

11 We calculated the recruitment rate by practice and by randomisation group. Demographic variables  
12 were compared for those recruited and those not recruited. The characteristics of baseline  
13 consultations were summarised both by practice and by intervention group. Key characteristics were  
14 compared using a linear mixed model with practice included as a random effect.  
15  
16

17 The change in outcome measures from baseline to follow-up was summarised using descriptive  
18 statistics by randomisation group. We estimated the difference between randomisation groups using  
19 a linear mixed model with practice included as a random effect. This would allow the estimation of  
20 potential differences in a full-scale trial. The intra-cluster correlation coefficient was estimated for  
21 each outcome, however great care should be taken in the interpretation of these due to the small  
22 number of clusters [27].  
23

#### 24 *Health economic evaluation*

25  
26 Data were collected on resource use from an NHS perspective to test data collection processes and  
27 to inform a future health economic evaluation estimating quality adjusted life years (QALYs). A  
28 record was kept of resources required to provide GP training, as well as the length of initial and  
29 follow-up goal-setting consultations. Additional health care resource use was extracted from  
30 electronic health records by practices supported by a study researcher (EL) for the six-months prior  
31 to randomisation and from randomisation to follow-up. Health care use was collected for: day-case  
32 and inpatient hospital admissions; outpatient visits; accident and emergency visits (A&E);  
33 consultations at the GP practice (GP, practice nurse, health care assistant, nurse practitioners); and  
34 other contacts, such as district nursing, allied health professional contacts, ambulance call outs, and  
35 specialist nursing contacts.  
36  
37

38 Resource use was costed using the NHS reference costs [28] for secondary care and a published  
39 source for primary care contacts [29]. NHS reference costs were used to estimate a weighted  
40 average cost for day cases, non-elective short stay, non-elective long stay, and elective admissions.  
41 For longer stays, additional days were costed using a weighted average of all excess bed day costs.  
42 For the first and second GP consultations in the goal-setting group, we had data on length of  
43 consultation and setting. The cost of providing training was estimated from a description given by  
44 the study researcher of duration and required staff. The cost of academic staff time was estimated  
45 using University pay scales (including employer's national insurance and superannuation payments).  
46 As the training would have relevance beyond the duration of the study, we estimated a useful life of  
47 3 years and calculated an annual equivalent cost [30]. All costs are in 2015/16 UK pounds sterling. As  
48 the duration of the study was six-months, we did not discount costs and benefits. As the study size  
49 was very small with great variability in estimates of cost and effect, we did not estimate formal cost-  
50 effectiveness.  
51  
52  
53

#### 54 *Qualitative analysis*

55  
56 The video and audio recordings of control and goal-setting consultations were compared by the  
57 research team (CS, EL, AS, JM and RH) to measure duration and explore the content and  
58  
59  
60



1  
2  
3 methodological implications for a future study. An in-depth analysis of the consultations using a  
4 conversation analytic informed approach [31] is reported elsewhere [32].  
5

6 A thematic framework-based analysis was used to analyse the focus groups [33] to assess the  
7 acceptability of the goal-setting intervention to patients and GPs and possible future improvements  
8 to the goal-setting intervention, training and trial design.  
9

#### 10 *Patient and Public Involvement (PPI)*

11  
12 Two PPI representatives contributed to the design of the research as co-applicants on the initial  
13 application for funding (AM and HS) and steering group membership (AM and CG). PPI members  
14 contributed to the analysis and interpretation of the results, with one PPI representative reviewing  
15 and scoring video consultations using OPTION (RH) and a further two reviewing a selection of video  
16 consultation transcripts (AM and CG). Two PPI members reviewed and commented on the  
17 manuscript and are co-authors (AM and CG).  
18  
19  
20  
21  
22  
23  
24  
25  
26  
27  
28  
29  
30  
31  
32  
33  
34  
35  
36  
37  
38  
39  
40  
41  
42  
43  
44  
45  
46  
47  
48  
49  
50  
51  
52  
53  
54  
55  
56  
57  
58  
59  
60



## Results

### *Recruitment and retention*

Sixty general practices were invited with seven expressing interest and six being recruited (Figure 1). Across the six practices (Table 1), 550 patients met the eligibility criteria and were invited. In total, 52 patients were recruited with 24 belonging to practices randomised to goal-setting and 28 to practices in the control group. Thirteen patients were held in reserve from three practices which had recruited enough patients. The response rate was 12%  $((52+13)/550)$ . There was little variation in age, sex and deprivation between those who participated and those who did not (Supplementary Table 1). Two participants in the goal-setting group and five in the control group did not receive the initial consultation because they declined to attend, were unavailable or withdrew consent. Four participants in the goal-setting group did not receive the follow-up consultation because of ill health or death. Data collected directly from participants were available for 18 participants in the goal-setting group and 23 in the control group. Participant data collected from practices were available for 23 participants in the goal-setting group and 28 in the control group. Recruitment of practices took place between December 2016 and February 2017 and recruitment of patients between April and May 2017.

The control practices were in more urbanised areas with larger practice populations and more female GPs participating compared to goal-setting practices (Table 1). The goal-setting group, compared to control (see Table 2), had more patient participants who were female (54% compared to 29%), older (80 years old compared to 77), with a higher number of health problems (5 compared to 4) and medications (13.0 compared to 11.5), but similar quality of life. The control group had participants spread across all four IMD quartiles, whereas the goal-setting group had participants in only the second and third quartiles. All participants were white British and retired, except for one participant in the goal-setting group who was of working age but not employed and one in the control group who was self-employed. There was variation in participant baseline characteristics between practices in mean age (range 69.5 to 85.8 years old), proportion of females (range 25% to 73%), number of medications (range 10.0 to 15.5) and number of health problems (range 3.0 to 7.5) across participating practices.

The mean initial consultation time in the goal-setting group was 23.0 minutes and in the control 19.2 minutes (Table 3). GPs in the intervention group saw a mean number of 4.4 patients (range 4 to 5), whereas GPs in the control group saw a mean of 3.8 patients (range 2 to 7). Patients spoke more in the goal-setting group initial consultation (mean GP:patient word count ratio (WCR) 1.35) than the control group (WCR 1.52). Dyadic OPTION scores for GPs perceptions of shared decision making were not statistically significantly higher in the goal-setting group compared to the control group, and collaboRATE scores were similar. Observer OPTION scores showed large variation and inconsistency in scoring between the three research team members (data not presented).

Most patients set two or three goals (Table 4) in the goal setting intervention arm, with GPs and patients setting on average one more goal in Practice 1 than in Practice 3. The commonest types of goals were related to management of chronic conditions, walking, maintaining social and leisure interests and weight management (Table 5). Forty-two of the 50 goals were scored with a mean attainment score per patient of 1.45 (1= partially attained and 2= as expected) with 'partially attained' being the commonest outcome (Table 4).

In the control arm, goals were rarely mentioned. Four usual-care GPs followed the care planning template recommended within the enhanced service for avoiding unplanned admissions [13], one

1  
2  
3 GP appeared to treat it as a normal consultation (i.e. problem focused) and another GP focused  
4 mainly on end of life issues.  
5

### 6 *Outcome measures*

7  
8 As expected in this small feasibility study, there were no statistically significant differences between  
9 goal-setting and control from baseline to follow-up in PACIC score, health-related quality of life as  
10 measured by EQ5D, number of medications or GPCOG score (Table 6 which also shows the intra-  
11 class correlation coefficients). Capability as measured by ICECAP-O at six months, improved slightly  
12 more in the control group than in the goal-setting group, but the 95% confidence interval included  
13 zero (mean difference between groups -0.08, 95% CI -0.15 to -0.00).  
14  
15

16 There was considerable variation in health care use in the six months prior to randomisation and six  
17 months follow-up (Table 7). Most types of health care contact increased in both the control and  
18 goal-setting groups, but district nurse contacts increased and inpatient admissions decreased only in  
19 the goal-setting group. Quality and Outcomes Framework data were collected at baseline and  
20 follow-up, but the results were uninformative due to low numbers and low variability  
21 (Supplementary Table 2). There was one death in the goal-setting group due to cancer, which was  
22 judged to be unrelated to the intervention. The estimated cost of the goal-setting was £147 per  
23 patient, of which £95 related to costs of providing initial and follow-up GP consultations, and £43  
24 related to the cost of GP training. There was a small cost for the study researcher to explain goal-  
25 setting. A mean cost of £50 per patient was incurred in the control group for the initial consultation.  
26 The single largest cost for the six-months prior to recruitment and the six-months of follow-up was  
27 inpatient stays (Table 7). There were also substantial costs in other settings, for example in general  
28 practice contacts and district nurse services. The types, number and associated costs of health  
29 service use varied considerably, as would be expected in a feasibility study.  
30  
31  
32  
33

### 34 *Acceptability*

35 Eleven patients expressed interest in the focus group and six were able to attend on the selected  
36 date. Two patients who were unable to attend took part in a telephone interview. Of the five GPs  
37 who delivered the intervention, four attended the focus group and one was unable to attend, and  
38 was subsequently interviewed face-to-face at the GP surgery. All six patient participants attending  
39 the focus group reported positive experiences and views of the intervention, particularly regarding  
40 the different emphasis of the consultation. Participants spoke of goal setting providing clarity about  
41 what mattered to them, and helping them to plan and focus their lives  
42  
43  
44

45 *"[Goal-setting] gives he or she a much better understanding of particularly what is worrying*  
46 *you, what your aims are, the things that you miss being able to do and to be able to actually*  
47 *explain it where [GPs] have time, because very often the GPs, you know, you've only got ten*  
48 *minutes. But with these consultations, you're actually able to talk to a doctor, as you would*  
49 *indeed a friend almost" (Patient 107)*  
50

51 Goal-setting appeared to function as a mechanism for helping make consultations patient-centred.  
52 This was reflected in the unanimous support for the intervention amongst the four GPs who  
53 attended the GP focus group and one GP who was interviewed by phone. GPs described the goal-  
54 setting consultations as *more patient-centred and reflected on its 'therapeutic powers'* (GP10)  
55 compared to day-to-day general practice, which GPs felt could be dominated by *'box-ticking'* and  
56 *'target driven'* (GP018) medicine.  
57  
58  
59  
60

1  
2  
3  
4  
5  
6  
7  
8  
9  
10  
11  
12  
13  
14  
15  
16  
17  
18  
19  
20  
21  
22  
23  
24  
25  
26  
27  
28  
29  
30  
31  
32  
33  
34  
35  
36  
37  
38  
39  
40  
41  
42  
43  
44  
45  
46  
47  
48  
49  
50  
51  
52  
53  
54  
55  
56  
57  
58  
59  
60

*“I felt almost as if I was trying to put on a different hat, you know, trying not to constantly interrupt them or to sort of sway them in any way, I was trying to give them the opportunity to just say what they wanted to say and set any goal that they wanted to and I, and it made me reflect on actually what I do during the day to day when I’ve got ten minutes with a patient and I’m very aware of the sort of pressure of, oh I’ve got to do a medication review and I’ve got to do this and oh no, their cholesterol’s now 7 and oh gosh I’ve, have my colleagues already spoke to them about this and are they aware of X, Y and Z and actually it was quite nice in a way just take a step back and think, um I don’t have to do that with this consultation, let’s see what happens when the patient has more control over it” (GP025)*

Patient participants spoke positively about the baseline researcher visit because it helped them understand the study and encouraged them to reflect on what was important. However, when discussing wider implementation across the health service, participants acknowledged that a home visit for each patient may be too costly and alternative provision would be acceptable to most people. Patients were reluctant to receive more paperwork as they felt that it was a burden for some people. When asked by the moderator to consider the acceptability of a group session to introduce people to the study and to the concept of goal-setting, all but one of the patient participants at the focus group felt this would be acceptable.

Continuity of care was a concern for patient participants. Participants spoke of wanting more follow-up and consistency amongst the health care team in relation to their goals in the future; some participants felt there was a disconnection between the activity of goal setting and their subsequent treatment by staff within the practice. While one person was disappointed not to see their own GP, three were positive about consulting with a different doctor, especially if it was difficult to see their usual GP.

GPs stated that the experiential work, especially role play and skill spotting, was the most useful aspect of training. When discussing delivering training at scale, GPs felt e-training with opportunities to watch ‘other people role-play’, would fit in with their busy schedules. In addition, multiple shorter e-training modules, using a ‘step-by-step’ approach (GP014) that contributed to continuing professional development, would be attractive to GPs when implementing the intervention more widely.

## Discussion

The process of setting goals in a GP consultation and follow-up over six months was acceptable to patients and unanimously supported by participating GPs. Recruitment and retention of practices and patients was achieved. A wide range of goals was set and, as expected with a feasibility study, there were no statistically significant differences in the main outcomes. Goal setting consultations were a similar length to control consultations. The qualitative findings were that goal-setting helped patients and GPs focus on what was important and supported GPs to deliver more patient-centred care. Patient preparedness, continuity of care and being able to deliver training at scale were important considerations for future studies of goal setting. Data on the number of health problems were uninformative due to low numbers and low variability. Asking GPs in the non-intervention group to undertake a video-recorded usual care planning consultation is likely to have altered practice compared to what would have happened within the enhanced service. An intention-to-treat analysis was undertaken to reduce the impact of protocol violations (e.g. patients not receiving the pre-specified intervention).

A Cochrane review, published in 2015, assessed the effects of personalised care planning (defined as goal-setting and action planning), for adults with long term health conditions compared to usual care [8]. Whilst 19 RCTs were included, all except for one focused on single conditions. The one multiple condition study included patients who had high health care use and focused on care planning, with goal-setting as part of the process, across the wider health care system to reduce unplanned admissions [34]. The authors found an increase in quality of life (measured by SF36) in the intervention compared to control, however with 50% of participants lost to follow-up and an intention to treat analysis not undertaken, there was a possibility of a lost to follow-up bias in favour of the intervention.

A systematic review of randomised and non-randomised studies, published in 2017, looked at collaborative goal-setting or health priority setting for elderly people with a chronic condition or multimorbidity [12]. The authors found that in four of eight intervention studies, multifactorial approaches improved goal-setting or care planning, but the review did not assess health outcomes or quality of life. The authors concluded that future research was needed to determine the “mix of essential elements within a multifactorial intervention to provide recommendations on daily practice”. Our study helps to answer this question by identifying some key requirements of goal-setting in primary care.

This was a feasibility study and the main implications are for the design of a subsequent definitive trial. Our objectives were to assess participant recruitment and retention, the acceptability of a goal-setting intervention to patients and GPs, the training needs of GPs, the content of control consultations, goal-setting and the feasibility of collecting relevant outcome measures.

We set out to recruit six practices, and seven (out of 60 invited) were willing to take part after initial email invitations. Participant recruitment and retention was sufficient overall, but low in one practice (which recruited four out of a target of ten). Reminder letters were not sent, and these may help all practices to recruit larger numbers if required in a future study. Seven participants, five from the control and two from goal-setting, did not receive the initial consultation because they declined the consultation, withdrew consent or were not able to attend. Possibly some were disappointed to be allocated to the control group.

Goal-setting was acceptable to participating patients and GPs, albeit a self-selecting group who were willing to take part in research into goal-setting. Goal setting is unlikely to be relevant to everyone,

1  
2  
3 but the positive response of participants in this feasibility study suggests that it is likely to have  
4 wider acceptability in general practice. Further research is needed to understand which patients will  
5 benefit most from goal setting. The readiness of patients to undertake goal-setting appeared to be  
6 important. Although several goals were only partially attained, GPs and patients still felt them to be  
7 worthwhile, suggesting that the process of goal setting has benefits, apart from the achievement of  
8 goals.  
9

10  
11 Training participating GPs in goal-setting was important, and participating GPs thought that the face-  
12 to-face training with role play used in the feasibility study could be replaced with online e-learning to  
13 allow delivery at scale to a wider GP workforce. The initial researcher visit was important to  
14 participants and the key elements of this visit would be delivered in a future trial using video and  
15 leaflet-based patient information aids, again to be developed using material collected during this  
16 feasibility study.  
17

18  
19 Goal setting consultations were more focussed on what mattered to the patient than the control  
20 consultations, and key challenges, which we discuss fully elsewhere, were around preparation and  
21 agreeing goals [32]. The concern reported by some patients when their goals were not considered in  
22 future health care contacts suggests that better communication of goals with the rest of the health  
23 care team will be needed. Planned follow-up of goals with the GP sooner than six months if needed  
24 would also improve continuity of care, which is associated with lower mortality [35].  
25

26  
27 We collected a wide range of outcome measures in order to assess their feasibility and suitability for  
28 use in a future trial. Both EQ-5D-5L and the ICECAP-O should be used in a future economic  
29 evaluation but would not be the best primary outcome measure for a trial of goal setting. A recent  
30 study which aimed to improve the management of patients with multimorbidity, the 3D study, used  
31 the EQ5D5L as a primary outcome, but did not find any significant difference between arms [36]. It  
32 may be that the domains within the EQ5D5L are insensitive to changes in care for patients with  
33 multimorbidity and a measure of patient centred care such as PACIC is a more appropriate primary  
34 outcome measure as it contains a sub scale to measure goal setting. Baseline and follow-up data  
35 were collected during researcher visits, which could be replaced by postal questionnaires as the  
36 amount and complexity of data to be collected would be reduced. Postal questionnaires are widely  
37 used in research and could either increase or reduce the completeness of follow-up data, depending  
38 on the preference of individuals for a visit rather than a postal form to complete.  
39

40  
41  
42 Quality and Outcomes Framework data did not prove useful because of the small numbers and low  
43 variation. The observer OPTION scoring, initially developed within a rehabilitation context, had low  
44 consistency between researchers and therefore was less useful. A possible reason for this lack of  
45 consistency was that OPTION was developed for specific clinical decisions, and not for goal setting  
46 which often involved multiple complex decisions.  
47

48  
49 Goal-setting can be valuable for GPs and patients seeking to agree the desired outcomes of care,  
50 particularly for older patients with multimorbidity. This study has demonstrated that it is acceptable  
51 and feasible in general practice, and a full trial is now needed to assess whether goal setting  
52 improves important clinical outcomes for patients.  
53  
54  
55  
56  
57  
58  
59  
60

1  
2  
3 Competing interests: None declared.  
4  
5  
6

7 Author contributions: NS, JF, CS and AS conceived the idea. All authors contributed to the design of  
8 the study. EL led the data collection which was supported by TW, IK and SJ. CS, JM and AS led the  
9 analysis of the qualitative data which was supported by SW. AC undertook the statistical analysis. DT  
10 undertook the economic analysis. CG and AM provided a patient and public perspective and helped  
11 with qualitative analysis. AL led the partnership with NHS England and contributed to handling of  
12 adverse events. All authors contributed to the interpretation of the results. JF drafted the initial  
13 manuscript. All authors revised the manuscript and approved the final version. NS is the guarantor.  
14  
15  
16

17  
18 Acknowledgements: We thank Rebecca Harmston (RH) for reviewing the video-consultations from  
19 the patient and public involvement perspective, Clara Yates and Gosia Majsak-Newman at the  
20 Norfolk and Suffolk Primary and Community Care Research Office for their support, and the patients  
21 and staff who took part in the study.  
22  
23  
24

25 *Funding statement:* This paper presents independent research funded by the National Institute for  
26 Health Research (NIHR) under its Research for Patient Benefit (RfPB) Programme (Grant Reference  
27 Number PB-PG-0215-36079). The views expressed are those of the author(s) and not necessarily  
28 those of the NHS, the NIHR or the Department of Health and Social Care. The funder did not have  
29 any role in the design, collection, analysis or interpretation of data or in writing the manuscript.  
30  
31  
32

33  
34 Data sharing:

35  
36 Dataset of quantitative data and statistical code is available from the corresponding author.  
37  
38  
39  
40  
41  
42  
43  
44  
45  
46  
47  
48  
49  
50  
51  
52  
53  
54  
55  
56  
57  
58  
59  
60



## References

1. Steel N, Ford JA, Newton JN, et al. Changes in health in the countries of the UK and 150 English Local Authority areas 1990 to 2016: a systematic analysis for the Global Burden of Disease Study 2016. *Lancet* 2018;**392**:1647-61 doi: 10.1016/S0140-6736(18)32207-4.
2. Barnett K, Mercer SW, Norbury M, Watt G, Wyke S, Guthrie B. Epidemiology of multimorbidity and implications for health care, research, and medical education: a cross-sectional study. *Lancet* 2012;**380**:37-43 doi: 10.1016/s0140-6736(12)60240-2.
3. Fortin M, Lapointe L, Hudon C, Vanasse A, Ntetu AL, Maltais D. Multimorbidity and quality of life in primary care: a systematic review. *Health and Quality of Life Outcomes* 2004;**2**:51-51 doi: 10.1186/1477-7525-2-51.
4. Wilkie P. Really putting patients first: ensuring significant involvement for patients in healthcare decision making. *Br J Gen Pract* 2015;**65**:108-09 doi: 10.3399/bjgp15X683821.
5. Reuben DB, Tinetti ME. Goal-Oriented Patient Care — An Alternative Health Outcomes Paradigm. *NEMJ* 2012;**366**:777-79 doi: 10.1056/NEJMp1113631.
6. Guthrie B, Payne K, Alderson P, McMurdo MET, Mercer SW. Adapting clinical guidelines to take account of multimorbidity. *BMJ* 2012;**345** doi: 10.1136/bmj.e6341.
7. National Institute for Health and Care Excellence. Multimorbidity: clinical assessment and management NICE guideline [NG56]. London, 2016. <https://www.nice.org.uk/guidance/ng56> Accessed on 8 Nov 2018.
8. Coulter A, Entwistle VA, Eccles A, Ryan S, Shepperd S, Perera R. Personalised care planning for adults with chronic or long-term health conditions. *Cochrane Database Syst Rev* 2015;Cd010523 doi: 10.1002/14651858.CD010523.pub2.
9. Reeves D, Hann M, Rick J, et al. Care plans and care planning in the management of long-term conditions in the UK: a controlled prospective cohort study. *Br J Gen Pract* 2014;**64**:e568-75 doi: 10.3399/bjgp14X681385.
10. Burt J, Roland M, Paddison C, et al. Prevalence and benefits of care plans and care planning for people with long-term conditions in England. *J Health Serv Res Policy* 2012;**17** Suppl 1:64-71 doi: 10.1258/jhsrp.2011.010172.
11. Elwyn G, Laitner S, Coulter A, Walker E, Watson P, Thomson R. Implementing shared decision making in the NHS. *BMJ* 2010;**341**:c5146 doi: 10.1136/bmj.c5146.
12. Vermunt NPCA, Harmsen M, Westert GP, Olde Rikkert MGM, Faber MJ. Collaborative goal setting with elderly patients with chronic disease or multimorbidity: a systematic review. *BMC Geriatr* 2017;**17**:167 doi: 10.1186/s12877-017-0534-0.
13. NHS England. Enhanced service specification: Avoiding unplanned admissions: proactive case finding and patient review for vulnerable people. 2014. <https://www.england.nhs.uk/wp-content/uploads/2014/06/avoid-unpln-admss-serv-spec.pdf> Accessed on 8 Nov 2018.
14. Steel N, Clark A, Ford J, et al. Goal-setting in care planning for people with multimorbidity: feasibility study and intervention refinement Norwich: University of East Anglia. 2016. <http://www.uea.ac.uk/medicine/research/primary-care-and-epidemiology/goalplan> Accessed on 8 Nov 2018.
15. Elwyn G, Frosch D, Thomson R, et al. Shared Decision Making: A Model for Clinical Practice. *J Gen Intern Med* 2012;**27**:1361-67 doi: 10.1007/s11606-012-2077-6.
16. Elwyn G, Durand MA, Song J, et al. A three-talk model for shared decision making: multistage consultation process. *BMJ* 2017;**359** doi: 10.1136/bmj.j4891.
17. Silverman J, Kurtz S, Draper J. *Skills for communicating with patients*: CRC Press, 2016.
18. Herdman M, Gudex C, Lloyd A, et al. Development and preliminary testing of the new five-level version of EQ-5D (EQ-5D-5L). *Qual Life Res* 2011;**20**:1727-36 doi: 10.1007/s11136-011-9903-x.
19. Coast J, Flynn TN, Natarajan L, et al. Valuing the ICECAP capability index for older people. *Soc Sci Med* 2008;**67**:874-82 doi: 10.1016/j.socscimed.2008.05.015.

20. Brodaty H, Pond D, Kemp NM, et al. The GPCOG: a new screening test for dementia designed for general practice. *J Am Geriatr Soc* 2002;**50**:530-4.
21. Glasgow RE, Wagner EH, Schaefer J, Mahoney LD, Reid RJ, Greene SM. Development and validation of the Patient Assessment of Chronic Illness Care (PACIC). *Med Care* 2005;**43**:436-44.
22. NHS Employers. General Medical Services (GMS) contract Quality and Outcomes Framework (QOF). 2014. <https://www.england.nhs.uk/gp/gpfp/investment/gp-contract/> Accessed on 8 Nov 2018.
23. Barr PJ, Thompson R, Walsh T, Grande SW, Ozanne EM, Elwyn G. The psychometric properties of CollaboRATE: a fast and frugal patient-reported measure of the shared decision-making process. *J Med Internet Res* 2014;**16**:e2 doi: 10.2196/jmir.3085.
24. Melbourne E, Sinclair K, Durand MA, Legare F, Elwyn G. Developing a dyadic OPTION scale to measure perceptions of shared decision making. *Patient Educ Couns* 2010;**78**:177-83 doi: 10.1016/j.pec.2009.07.009.
25. Turner-Stokes L. Goal attainment scaling (GAS) in rehabilitation: a practical guide. *Clin Rehabil* 2009;**23**:362-70 doi: 10.1177/0269215508101742.
26. Barr PJ, O'Malley AJ, Tsulukidze M, Gionfriddo MR, Montori V, Elwyn G. The psychometric properties of Observer OPTION5, an observer measure of shared decision making. *Patient Educ Couns* 2015;**98**:970-76 doi: <https://doi.org/10.1016/j.pec.2015.04.010>.
27. Eldridge SM, Costelloe CE, Kahan BC, Lancaster GA, Kerry SM. How big should the pilot study for my cluster randomised trial be? *Stat Methods Med Res* 2016;**25**:1039-56 doi: 10.1177/0962280215588242.
28. Department of Health and Social Care. NHS reference costs 2015 to 2016. London, 2016. <https://www.gov.uk/government/publications/nhs-reference-costs-2015-to-2016> Accessed on 8 Nov 2018.
29. Curtis L. Unit Costs of Health and Social Care 2017. Canterbury: University of Kent 2017. <https://www.pssru.ac.uk/project-pages/unit-costs/unit-costs-2017/> Accessed on 8 Nov 2018.
30. Drummond MF, Sculpher MJ, Claxton K, Stoddart GL, Torrance GW. *Methods for the economic evaluation of health care programmes*: Oxford University Press, 2015.
31. Drew P, Chatwin J, Collins S. Conversation analysis: a method for research into interactions between patients and health-care professionals. *Health Expect* 2001;**4**:58-70.
32. Salter C, Shiner A, Lenaghan E, et al. Setting goals with patients living with multimorbidity: qualitative analysis of general practice consultations. 2018. Manuscript submitted for publication .
33. Ritchie J, Lewis J, Nicholls CM, Ormston R. *Qualitative research practice: A guide for social science students and researchers*: Sage, 2013.
34. Battersby M, Harvey P, Mills PD, et al. SA HealthPlus: a controlled trial of a statewide application of a generic model of chronic illness care. *Milbank Q* 2007;**85**:37-67 doi: 10.1111/j.1468-0009.2007.00476.x.
35. Pereira Gray DJ, Sidaway-Lee K, White E, Thorne A, Evans PH. Continuity of care with doctors—a matter of life and death? A systematic review of continuity of care and mortality. *BMJ Open* 2018;**8** doi: 10.1136/bmjopen-2017-021161.
36. Salisbury C, Man MS, Bower P, et al. Management of multimorbidity using a patient-centred care model: a pragmatic cluster-randomised trial of the 3D approach. *Lancet* 2018;**392**:41-50 doi: 10.1016/s0140-6736(18)31308-4.
37. Office for National Statistics. 2011 Rural-urban classification. 2011. <http://www.ons.gov.uk/ons/guide-method/geography/products/area-classifications/2011-rural-urban/index.html> Accessed on 8 Nov 2018.



1  
2  
3  
4  
5  
6  
7  
8  
9  
10  
11  
12  
13  
14  
15  
16  
17  
18  
19  
20  
21  
22  
23  
24  
25  
26  
27  
28  
29  
30  
31  
32  
33  
34  
35  
36  
37  
38  
39  
40  
41  
42  
43  
44  
45  
46  
47  
48  
49  
50  
51  
52  
53  
54  
55  
56  
57  
58  
59  
60

Figure legends

Figure 1: Consort flow diagram

For peer review only

Table 1: Practice characteristics and patient recruitment

|                                      | Goal-setting                             |                                          |                        | Control                                         |                                     |                                               |
|--------------------------------------|------------------------------------------|------------------------------------------|------------------------|-------------------------------------------------|-------------------------------------|-----------------------------------------------|
|                                      | Practice 1                               | Practice 2                               | Practice 3             | Practice 4                                      | Practice 5                          | Practice 6                                    |
| <b>Practice characteristics</b>      |                                          |                                          |                        |                                                 |                                     |                                               |
| Practice rurality*                   | Village                                  | Town and fringe                          | Town and fringe        | Urban >10K                                      | Urban >10K                          | Urban >10K                                    |
| Patient population                   | 5000 to 9,900                            | 10,000 to 14,900                         | 5000 to 9,900          | >14,900                                         | 10,000 to 14,900                    | 10,000 to 14,900                              |
| IMD practice decile                  | 7                                        | 5                                        | 7                      | 9                                               | 5                                   | 5                                             |
| Characteristics of participating GPs | 2 x male (partners, 2 x PT)              | 1 x male, 1 x female (partners, 2 x FT)  | 1 x male (partner, PT) | 1 x male, 1 x female (partners, 1 x FT, 1 x PT) | 2 x female (partners, 2 x PT)       | 2 x female (partners, 2 x PT)                 |
| Years qualified of participating GPs | GP014 = >20 yrs;<br>GP018 = 10 to 20 yrs | GP025 = <10 yrs;<br>GP026 = 10 to 20 yrs | GP038 = 10 to 20 yrs   | GP046 = >20 yrs;<br>GP047 = >20 yrs             | GP053 = >20 yrs;<br>GP055 = >20 yrs | GP061 = 10 to 20 yrs;<br>GP067 = 10 to 20 yrs |
| <b>Patient recruitment</b>           |                                          |                                          |                        |                                                 |                                     |                                               |
| Patients assessed for eligibility, n | 9067                                     | 14845                                    | 6791                   | 108 (0.6)                                       | 124 (1.2)                           | 86 (0.6)                                      |
| Patients invited, n(%)               | 77 (0.8)                                 | 108 (0.7)                                | 47 (0.7)               | 8 (7.4)                                         | 10 (8.1)                            | 10 (11.6)                                     |
| Recruited, n(%)**                    | 11 (14.3)                                | 9 (8.3)                                  | 4 (8.5)                | 108 (0.6)                                       | 124 (1.2)                           | 86 (0.6)                                      |

\*ONS indicator 2011 [37], IMD = Index of Multiple Deprivation (1= most deprived and 10 least deprived), partner = GP with responsibility for the practice, FT= full time, PT = part time, n= number, \*\*=does not include those on the reserve list (see Figure 1)

Table 2: Baseline characteristics of patient participants

| Variable                          |                                               | Control           | Goal-setting      |
|-----------------------------------|-----------------------------------------------|-------------------|-------------------|
| Number                            |                                               | 28                | 24                |
| Female n (%)                      |                                               | 11 (39%)          | 13 (54%)          |
| Age mean (SD)                     |                                               | 77.18 (9.42)      | 80.42 (8.72)      |
| GPCOG category n (%)              | Impairment and further investigations implied | 1 (4%)            | 0 (0%)            |
|                                   | Informant interview required                  | 17 (61%)          | 19 (79%)          |
|                                   | No cognitive impairment                       | 10 (36%)          | 5 (21%)           |
| Number of diagnoses* median (IQR) |                                               | 4.00 (3.00, 5.00) | 5.00 (3.00, 6.00) |
| IMD national quartile n (%)       | 1                                             | 5 (18%)           | 0 (0%)            |
|                                   | 2                                             | 9 (32%)           | 14 (58%)          |
|                                   | 3                                             | 3 (11%)           | 10 (42%)          |
|                                   | 4                                             | 11 (39%)          | 0 (0%)            |
| Marital status n (%)              | Divorced                                      | 0 (0%)            | 2 (8%)            |
|                                   | Living with partner                           | 0 (0%)            | 2 (8%)            |
|                                   | Married                                       | 12 (43%)          | 10 (42%)          |
|                                   | Single                                        | 2 (7%)            | 4 (17%)           |
|                                   | Widowed                                       | 14 (50%)          | 6 (25%)           |

N= number, SD = standard deviation, IQR = Interquartile Range, GPCOG = General Practitioner assessment of Cognition, PACIC = Patients Assessment Chronic Illness Care, EQ-5Q-5L = 5 level EQ-5D, ICECAP-O = ICEpop CAPability measure for Older people, \* = based on Barnett list [2], IMD = Index of Multiple Deprivation

Table 3: Characteristics of initial consultations

|                                                   | Intervention group     |                       |                       |                                | Control group         |                       |                       |                           | Mean difference between intervention and control (95% CI) |
|---------------------------------------------------|------------------------|-----------------------|-----------------------|--------------------------------|-----------------------|-----------------------|-----------------------|---------------------------|-----------------------------------------------------------|
|                                                   | Practice 1<br>(n = 10) | Practice 2<br>(n = 8) | Practice 3<br>(n = 4) | Intervention total<br>(n = 22) | Practice 4<br>(n = 7) | Practice 5<br>(n = 9) | Practice 6<br>(n = 7) | Control total<br>(n = 23) |                                                           |
| Duration of initial consultation (mins) mean (SD) | 24.1<br>(4.0)          | 23.3<br>(4.4)         | 19.9<br>(6.2)         | 23.0 (4.6)                     | 14.3<br>(4.8)         | 25.2<br>(5.7)         | 16.3<br>(4.1)         | 19.2 (6.9)                | 3.88<br>(-3.25,11.01)                                     |
| Dyadic OPTION scores mean (SD)                    | 65.3<br>(9.0)          | 63.2<br>(6.4)         | 62.5<br>(3.6)         | 64.0 (7.2)                     | 63.5<br>(13.0)        | 62.7<br>(4.0)         | 42.1<br>(20.4)        | 56.6<br>(16.2)            | 7.57<br>(-6.37,21.50)                                     |
| CollaboRATE scores mean (SD)                      | 7.8 (1.0)              | 8.5 (0.9)             | 8.8 (0.2)             | 8.2 (1.0)                      | 7.0 (2.6)             | 8.6 (0.7)             | 8.7 (0.6)             | 8.1 (1.8)                 | 0.20<br>(-1.06,1.47)                                      |
| GP:patient word count ratio mean (SD)             | 1.23<br>(0.40)         | 1.41<br>(0.78)        | 1.50<br>(1.05)        | 1.35 (0.67)                    | 1.13<br>(0.45)        | 1.92<br>(0.75)        | 1.39<br>(0.52)        | 1.52<br>(0.67)            | -0.14<br>(-0.65,0.37)                                     |

SD= standard deviation, n= number, 95%CI = 95% confidence interval

Table 4: Number of goals set and goal attainment score

|                                                            |                          | Practice 1<br>(n = 10) | Practice 2<br>(n = 8) | Practice 3<br>(n = 4) | Total     |
|------------------------------------------------------------|--------------------------|------------------------|-----------------------|-----------------------|-----------|
| Goals set                                                  |                          | 27                     | 16                    | 7                     | 50        |
| Number of goal per patient                                 | 1 goal set               | 0                      | 2                     | 1                     | 3         |
|                                                            | 2 goals set              | 3                      | 4                     | 3                     | 10        |
|                                                            | 3 goals set              | 7                      | 2                     | 0                     | 9         |
| Number of goals with data available for attainment scoring |                          | 21                     | 15                    | 6                     | 42        |
| Mean score of goal attainment per patient                  |                          | 1.43                   | 1.67                  | 1.0                   | 1.45      |
| Goal attainment n (%)                                      | worse than expected      | 1 (4.8)                | 2 (13.3)              | 1 (16.7)              | 4 (9.5)   |
|                                                            | no change                | 4 (19.0)               | 0 (0.0)               | 2 (33.3)              | 6 (14.3)  |
|                                                            | partially attained       | 9 (42.9)               | 5 (33.3)              | 1 (16.7)              | 15 (35.7) |
|                                                            | as expected              | 2 (9.5)                | 3 (20.0)              | 1 (16.7)              | 6 (14.3)  |
|                                                            | a little more            | 2 (9.5)                | 4 (26.7)              | 0 (0.0)               | 6 (14.3)  |
|                                                            | a lot more than expected | 3 (14.3)               | 1 (6.7)               | 1 (16.7)              | 5 (11.9)  |

n = number of participants

Table 5: Categories of goals set

| Goal categories                                      | Number of goals |
|------------------------------------------------------|-----------------|
| Management of chronic condition (non-medication)     | 9               |
| Walking-related                                      | 8               |
| Maintain interests                                   | 5               |
| Management of chronic condition (medication-related) | 5               |
| Gain weight                                          | 4               |
| Social participation                                 | 3               |
| Healthy living                                       | 3               |
| Balance/mobility                                     | 3               |
| Gardening-related                                    | 3               |
| Manual dexterity                                     | 3               |
| Mental health                                        | 2               |
| End of life management                               | 1               |
| Cooking/food preparation                             | 1               |
| Grand Total                                          | 50              |

Table 6: Change in outcome measures between groups at six months

| Variable             | Control |             |                 |                 | Intervention |              |                 |                 | Mean difference-<br>in-difference<br>between goal-<br>setting and<br>control (95% CI) | Intraclass<br>correlation<br>coefficient<br>(95% CI) |
|----------------------|---------|-------------|-----------------|-----------------|--------------|--------------|-----------------|-----------------|---------------------------------------------------------------------------------------|------------------------------------------------------|
|                      | n       | Baseline    | Follow-<br>up   | Differenc<br>e  | n            | Baseline     | Follow-<br>up   | Differenc<br>e  |                                                                                       |                                                      |
| Number of medication | 28      | 12.5 (8.19) | 12.79<br>(7.25) | 0.29<br>(2.65)  | 23           | 13.61 (4.56) | 14.65<br>(4.44) | 1.04<br>(3.21)  | 0.76 (-0.85,2.37)                                                                     | Not estimated                                        |
| GPCOG                | 23      | 7.35 (1.70) | 6.78<br>(2.19)  | -0.57<br>(2.02) | 19           | 7.58 (1.30)  | 7.00<br>(2.26)  | -0.58<br>(2.29) | 0.09 (-1.65,1.84)                                                                     | 0.08<br>(0.00,0.77)                                  |
| PACIC                | 23      | 1.45 (0.30) | 1.85<br>(0.77)  | 0.40<br>(0.69)  | 18           | 1.94 (0.76)  | 2.25<br>(0.70)  | 0.31<br>(0.98)  | -0.09 (-0.60,0.42)                                                                    | Not estimated                                        |
| EQ-5D-5L             | 23      | 0.54 (0.34) | 0.52<br>(0.35)  | -0.02<br>(0.19) | 18           | 0.56 (0.25)  | 0.55<br>(0.28)  | -0.01<br>(0.15) | 0.02 (-0.11,0.13)                                                                     | 0.05<br>(0.00,0.94)                                  |
| ICECAP-O             | 22      | 0.72 (0.26) | 0.78<br>(0.20)  | 0.06<br>(0.14)  | 17           | 0.78 (0.12)  | 0.77<br>(0.13)  | -0.02<br>(0.06) | -0.08 (-0.15,-<br>0.00)                                                               | Not estimated                                        |

SD = standard deviation, GPCOG = General Practitioner assessment of Cognition, PACIC = Patients Assessment Chronic Illness Care, EQ-5Q-5L = 5 level EQ-5D, ICECAP-O = ICEpop CAPability measure for Older people, 95%CI = 95% confidence interval

Table 7: Costs associated with health care use

| Resource use             | 6-months prior to recruitment |                               |                     |                        |                                    |                     | Recruitment to 6-month follow-up |                               |                     |                     |                                    |                     |
|--------------------------|-------------------------------|-------------------------------|---------------------|------------------------|------------------------------------|---------------------|----------------------------------|-------------------------------|---------------------|---------------------|------------------------------------|---------------------|
|                          | Total contacts<br>n           | Control<br>Total<br>cost<br>£ | Mean cost<br>£ (SD) | Total<br>contacts<br>n | Goal-setting<br>Total<br>cost<br>£ | Mean cost<br>£ (SD) | Total contacts<br>n              | Control<br>Total<br>cost<br>£ | Mean cost<br>£ (SD) | Total contacts<br>n | Goal-setting<br>Total<br>cost<br>£ | Mean cost<br>£ (SD) |
| Community based services |                               |                               |                     |                        |                                    |                     |                                  |                               |                     |                     |                                    |                     |
| GP                       | 157                           | 4,636                         | 166 (164)           | 89                     | 2,464                              | 107 (115)           | 177                              | 5,150                         | 184 (150)           | 124                 | 4,002                              | 174 (145)           |
| Other practice based     | 97                            | 922                           | 33 (42)             | 108                    | 1,080                              | 47 (30)             | 152                              | 1,823                         | 65 (58)             | 149                 | 1,529                              | 66 (53)             |
| District Nurse           | 148                           | 3,582                         | 128 (546)           | 198                    | 6,450                              | 280 (1297)          | 100                              | 2,879                         | 103 (321)           | 241                 | 7,450                              | 324 (1384)          |
| Other                    | 72                            | 1,434                         | 51 (132)            | 72                     | 2,601                              | 113 (193)           | 189                              | 7,652                         | 273 (355)           | 97                  | 5,510                              | 240 (224)           |
| All community based      | 474                           | 10,575                        | 378 (778)           | 467                    | 12,594                             | 548 (1520)          | 618                              | 15,681                        | 560 (719)           | 611                 | 16,962                             | 737 (1537)          |
| Inpatient                | 4                             | 11,291                        | 403 (1113)          | 16                     | 28,054                             | 1220 (2584)         | 12                               | 35,055                        | 1252 (2203)         | 13                  | 39,889                             | 1734 (4815)         |
| Outpatient               | 45                            | 4,848                         | 173 (208)           | 51                     | 7,381                              | 321 (397)           | 41                               | 4,424                         | 158 (202)           | 52                  | 6,295                              | 274 (329)           |
| A&E                      | 1                             | 138                           | 5 (26)              | 6                      | 826                                | 36 (74)             | 15                               | 2,066                         | 74 (109)            | 16                  | 2,204                              | 96 (128)            |
| Total for all costs      |                               | 26,853                        | 959 (1776)          |                        | 48,856                             | 2124 (4031)         |                                  | 57,226                        | 2044 (2665)         |                     | 65,349                             | 2841 (4968)         |

SD = standard deviation, A&E = Accident and Emergency



1  
2  
3  
4  
5  
6  
7  
8  
9  
10  
11  
12  
13  
14  
15  
16  
17  
18  
19  
20  
21  
22  
23  
24  
25  
26  
27  
28  
29  
30  
31  
32  
33  
34  
35  
36  
37  
38  
39  
40  
41  
42  
43  
44  
45  
46  
47  
48  
49  
50  
51  
52  
53  
54  
55  
56  
57  
58  
59  
60

For peer review only

Figure 1: Consort flow diagram

1  
2  
3  
4  
5  
6  
7  
8  
9  
10  
11  
12  
13  
14  
15  
16  
17  
18  
19  
20  
21  
22  
23  
24  
25  
26  
27  
28  
29  
30  
31  
32  
33  
34  
35  
36  
37  
38  
39  
40  
41  
42  
43  
44  
45  
46  
47  
48  
49  
50  
51  
52  
53  
54  
55  
56  
57  
58  
59  
60

**Enrolment**

Practices invited (N = 60)

- Declined (N = 1)
- No response (N = 52)
- Agreed (N = 6)
- In reserve (N = 1)

Practices recruited (N = 6)

Patients assessed for eligibility (n = 73063)

Patients meeting eligibility criteria and invited to take part (n = 550)

Excluded (n = 485)

- No response (n = 475)
- Declined (n = 10)
- Reserve (n = 13)

**Randomised (N = 6 practices, n = 52 participants)**

**Allocation**

**Allocated to goal-setting (N = 3 practices, n = 24 participants)**

- Practices received goal-setting training (N = 3)
- Received initial and follow-up goal-setting consultation (n = 18)
- Received initial goal-setting consultation only (n = 4)  
*Reasons:*  
*Died before follow up consultation (n = 1)*  
*Declined due to ill health (n = 3)*
- Did not receive initial goal-setting consultation (n = 2)  
*Reasons:*  
*Complete withdrawal shortly after consent (n = 1)*  
*Declined consultation (n = 1)*

**Allocated to control (N = 3 practices, n = 28 participants)**

- Received consultation (n = 23)
- Did not receive consultation (n = 5)  
*Reasons:*  
*Declined consultation (n = 3)*  
*Participant not available (n = 2)*

**Follow-Up**

Lost to follow-up (n = 0)

Lost to follow-up (n = 0)

**Analysis**

**Analysed for patient-reported outcomes (n = 18)**

Excluded from patient-reported data collection (n = 6)

*Reasons:*  
*Complete withdrawal shortly after consent (n = 1)*  
*Declined follow-up researcher visit (n = 4)*  
*Died before follow-up researcher visit (n = 1)*

**Analysed for patient-reported outcomes (n = 23)**

Excluded from patient-reported data collection (n = 5)

*Reasons:*  
*Declined follow-up researcher visit (n = 5)*

**Analysed for practice-reported outcomes (n = 23)**

Excluded from practice-reported data collection (n = 1)

*Reasons:*  
*Complete withdrawal shortly after consent (n = 1)*

**Analysed for practice-reported outcomes (n = 28)**

Excluded from practice-reported data collection (n = 0)

(N= number of practice, n= number of individuals)

Supplementary Table 1: Characteristics of those who participated compared with those who did not

|                      | Participation | Non-participation |
|----------------------|---------------|-------------------|
| Number               | 52            | 498               |
| Age mean (SD)        | 78.5 (9.0)    | 79.6 (12.2)       |
| Female %             | 46.2%         | 53.8%             |
| IMD decile mean (SD) | 5.8 (2.3)     | 5.3 (2.2)         |

SD = standard deviation, IMD = Index of Multiple Deprivation

For peer review only

Supplementary Table 2: Quality and Outcomes Framework data

|                                                   |                                                   | Goal-setting | Control      |
|---------------------------------------------------|---------------------------------------------------|--------------|--------------|
| BMI                                               | No of participants                                | 2            | 3            |
|                                                   | Baseline mean (SD)                                | 28.4 (1.9)   | 37.8 (8.0)   |
|                                                   | Follow-up (mean, SD)                              | 28.5 (3.6)   | 37.0 (9.5)   |
|                                                   | Diff (mean, SD)                                   | 0.1 (1.7)    | -0.8 (2.7)   |
| BP, mmHg                                          | No of participants                                | 5            | 5            |
|                                                   | Baseline systolic (mean, SD)                      | 133.5 (6.5)  | 127.5 (19.0) |
|                                                   | Baseline diastolic (mean, SD)                     | 70.7 (4.4)   | 69.2 (5.5)   |
|                                                   | Follow-up systolic (mean, SD)                     | 144.7 (7.0)  | 124.4 (6.2)  |
|                                                   | Follow-up diastolic (mean, SD)                    | 80.6 (4.7)   | 67.1 (5.6)   |
|                                                   | Mean diff systolic (mean, SD)                     | 11.2 (12.6)  | -3.1 (14.4)  |
|                                                   | Mean diff diastolic (mean, SD)                    | 9.9 (3.1)    | -2.1 (8.7)   |
|                                                   | Baseline Qof target met (150/90)                  | 5/5          | 5/5          |
|                                                   | Follow-up Qof target met (150/90)                 | 4/5          | 5/5          |
| eGFR, mL/min/1,73m <sup>2</sup>                   | No of participants                                | 4            | 6            |
|                                                   | Baseline (mean, SD)                               | 54 (14)      | 57 (24)      |
|                                                   | Follow-up (mean, SD)                              | 56 (17)      | 59 (25)      |
|                                                   | Mean diff (mean, SD)                              | 2 (5)        | 2 (3)        |
| HB1Ac, mmol/mol                                   | No of participants                                | 1            | 3            |
|                                                   | Baseline (mean, SD)                               | 80 (NA)      | 39 (3)       |
|                                                   | Follow-up (mean, SD)                              | 87 (NA)      | 43 (6)       |
|                                                   | Mean diff (mean, SD)                              | 7 (NA)       | 4 (3)        |
|                                                   | Baseline Qof target met - Diabetes and HB1Ac <59  | 0/1          | 1/1          |
|                                                   | Baseline Qof target met - Diabetes and HB1Ac <64  | 0/1          | 1/1          |
|                                                   | Baseline Qof target met - Diabetes and HB1Ac <75  | 0/1          | 1/1          |
|                                                   | Follow-up Qof target met - Diabetes and HB1Ac <59 | 0/1          | 1/1          |
|                                                   | Follow-up Qof target met - Diabetes and HB1Ac <64 | 0/1          | 1/1          |
| Follow-up Qof target met - Diabetes and HB1Ac <75 | 0/1                                               | 1/1          |              |
| Total cholesterol, mg/dL                          | No of participants                                | 2            | 1            |
|                                                   | Baseline (mean, SD)                               | 2.8 (0.7)    | 4.2 (NA)     |
|                                                   | Follow-up (mean, SD)                              | 3.9 (1.1)    | 4.9 (NA)     |
|                                                   | Mean diff (mean, SD)                              | 1.1 (0.5)    | 0.7 (NA)     |
| HDL cholesterol, mg/dL                            | No of participants                                | 2            | 0            |
|                                                   | Baseline (mean, SD)                               | 0.84 (0.19)  | NA           |
|                                                   | Follow-up (mean, SD)                              | 1.01 (0.4)   | NA           |
|                                                   | Mean diff (mean, SD)                              | 0.17 (0.15)  | NA           |

BMI = body mass index, SD= standard deviation, BP = blood pressure, eGFR = estimated glomerular filtration rate, HB1Ac = glycated haemoglobin, Qof = Quality and Outcomes Framework, HDL = High Density Lipoproteins, NA= not applicable



# BMJ Open GoalPlan Study: Goal-setting form

for completion before care plan appointment



1  
2  
3  
4  
5  
6  
7  
8  
9  
10  
11  
12  
13  
14  
15  
16  
17  
18  
19  
20  
21  
22  
23  
24  
25  
26  
27  
28  
29  
30  
31  
32  
33  
34  
35  
36  
37  
38  
39  
40  
41  
42  
43  
44  
45  
46  
47

## Part 1) What are your goals? What is important to you?

Write down what you would really like to do or achieve over the next 6 months, even if you think it may not be related to your health. Think about things that you would like to do in your personal, home, work, and social life—things that you **need** to do, **want** to do and / or **enjoy doing**. Then list them in order of priority— starting with 1 for the goal that matters to you most and that you would like to focus on at the moment. To help you, we have put a completed example overleaf.

**What do you really want to achieve over the next 6 months? (your goals)**

---

For peer review only

1  
2  
3  
4  
5  
6  
7  
8  
9  
10  
11  
12  
13  
14  
15  
16  
17  
18  
19  
20  
21  
22  
23  
24  
25  
26  
27  
28  
29  
30  
31  
32  
33  
34  
35  
36  
37  
38  
39  
40  
41  
42  
43  
44  
45  
46  
47

Example

- *I want to be able to do more in the garden as it relaxes me*
- *I want to lose weight so I can walk more confidently at my daughter's wedding and fit into my favourite outfit again*
- *I want to be able to get more exercise as it used to help me sleep well*
- *I want to get back to driving so I can visit my friend at his house every week*
- *I want to be able to go out with friends once a week again for lunch*

### Part 2) Why are these goals important to you?

We now ask you to focus on your goals from Part 1, and to think about why they are important to you. Below is an example of how to find out if a goal you have come up with is important for its own sake, or if it is important because it will help you achieve something else. We ask you to do this exercise with up to three of your goals overleaf.

### Part 3) What are the first steps you would like to take towards achieving this goal or goals?

Having identified your most important goals, the final step on this form is to start thinking about steps you would like to take to achieve those goals. This is also included in the example below. Please do the same for your goals overleaf.



1  
2  
3  
4  
5  
6  
7  
8  
9  
10  
11  
12  
13  
14  
15  
16  
17  
18  
19  
20  
21  
22  
23  
24  
25  
26  
27  
28  
29  
30  
31  
32  
33  
34  
35  
36  
37  
38  
39  
40  
41  
42  
43  
44  
45  
46  
47

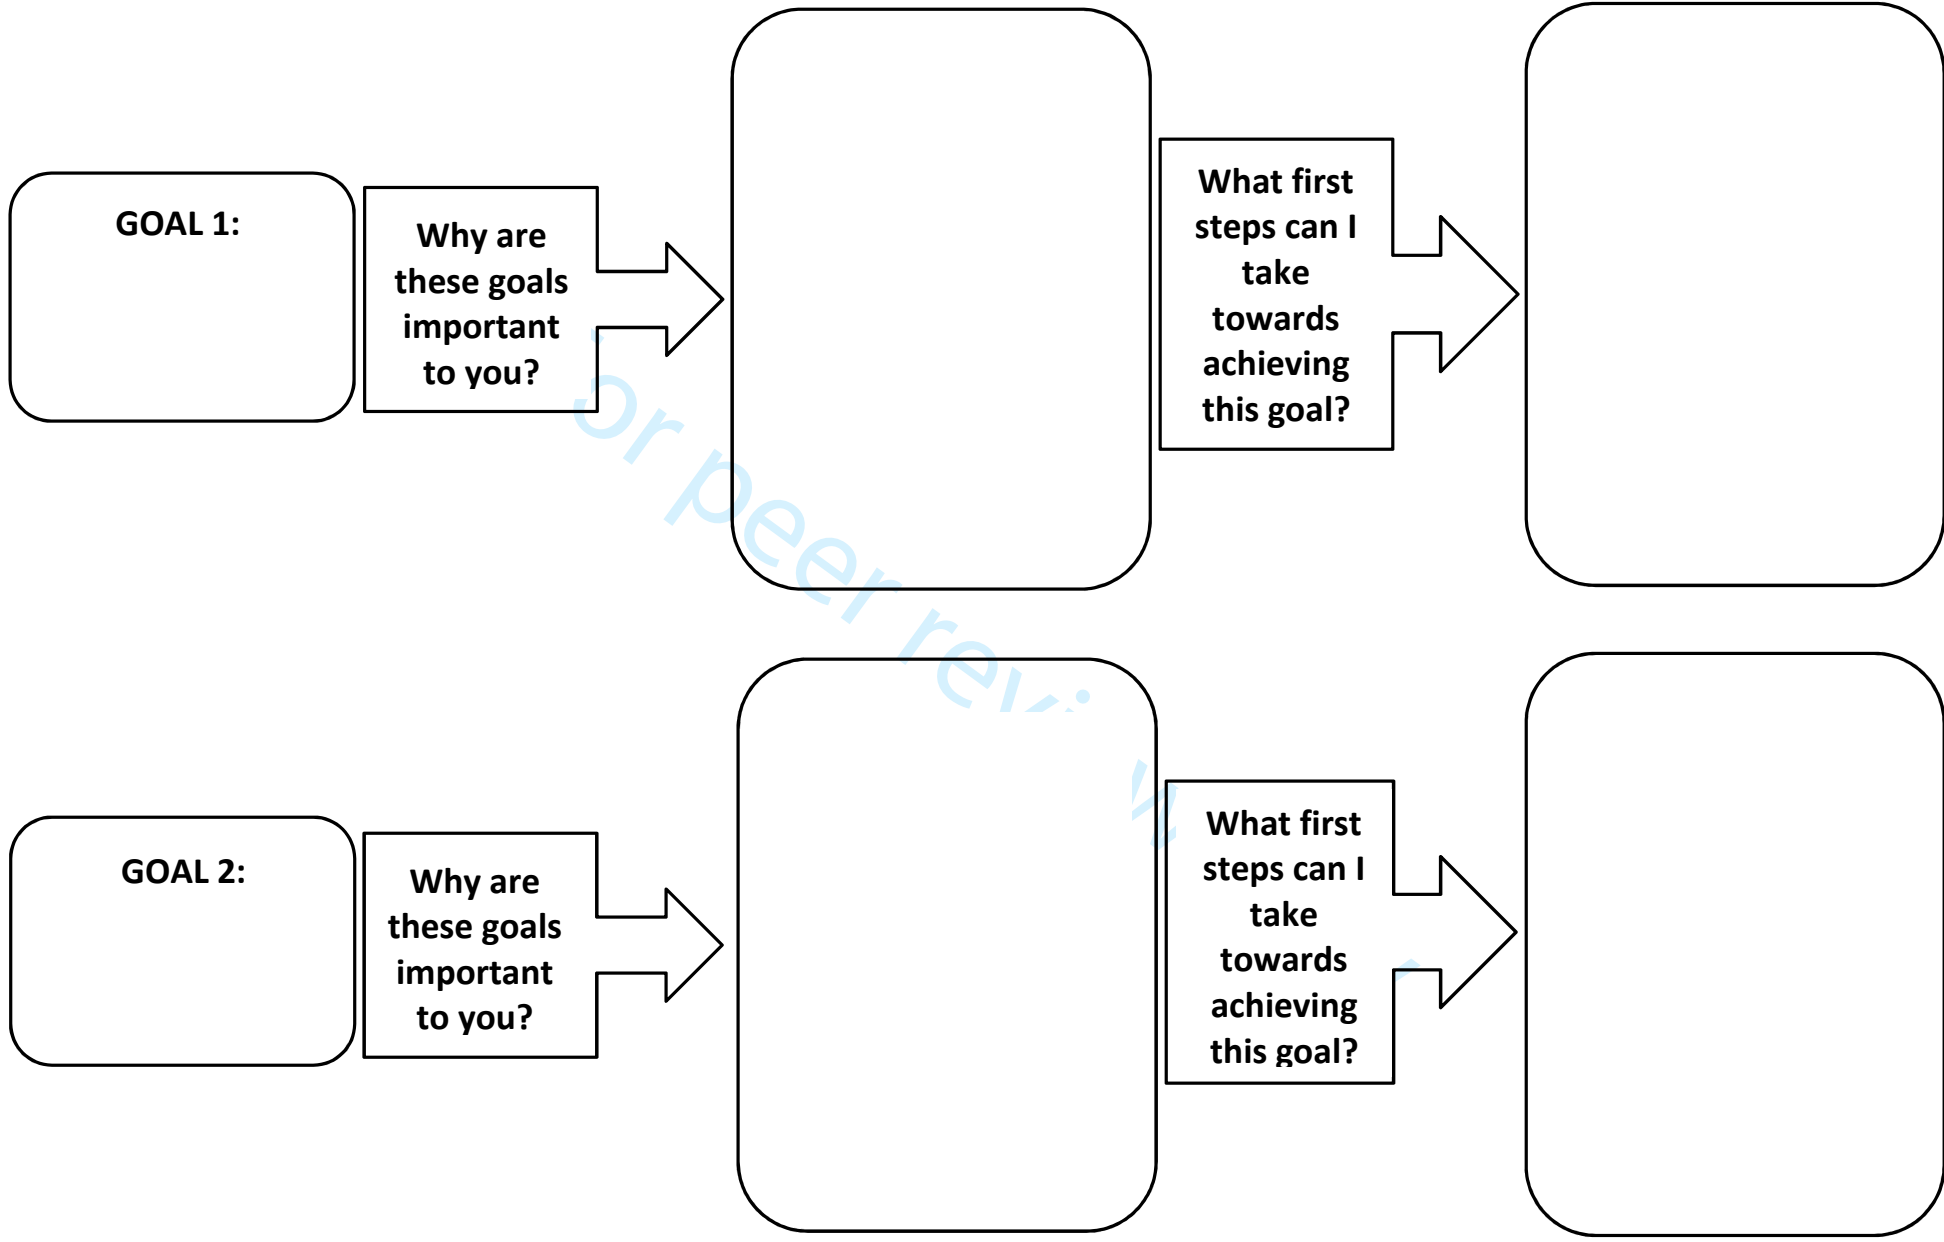

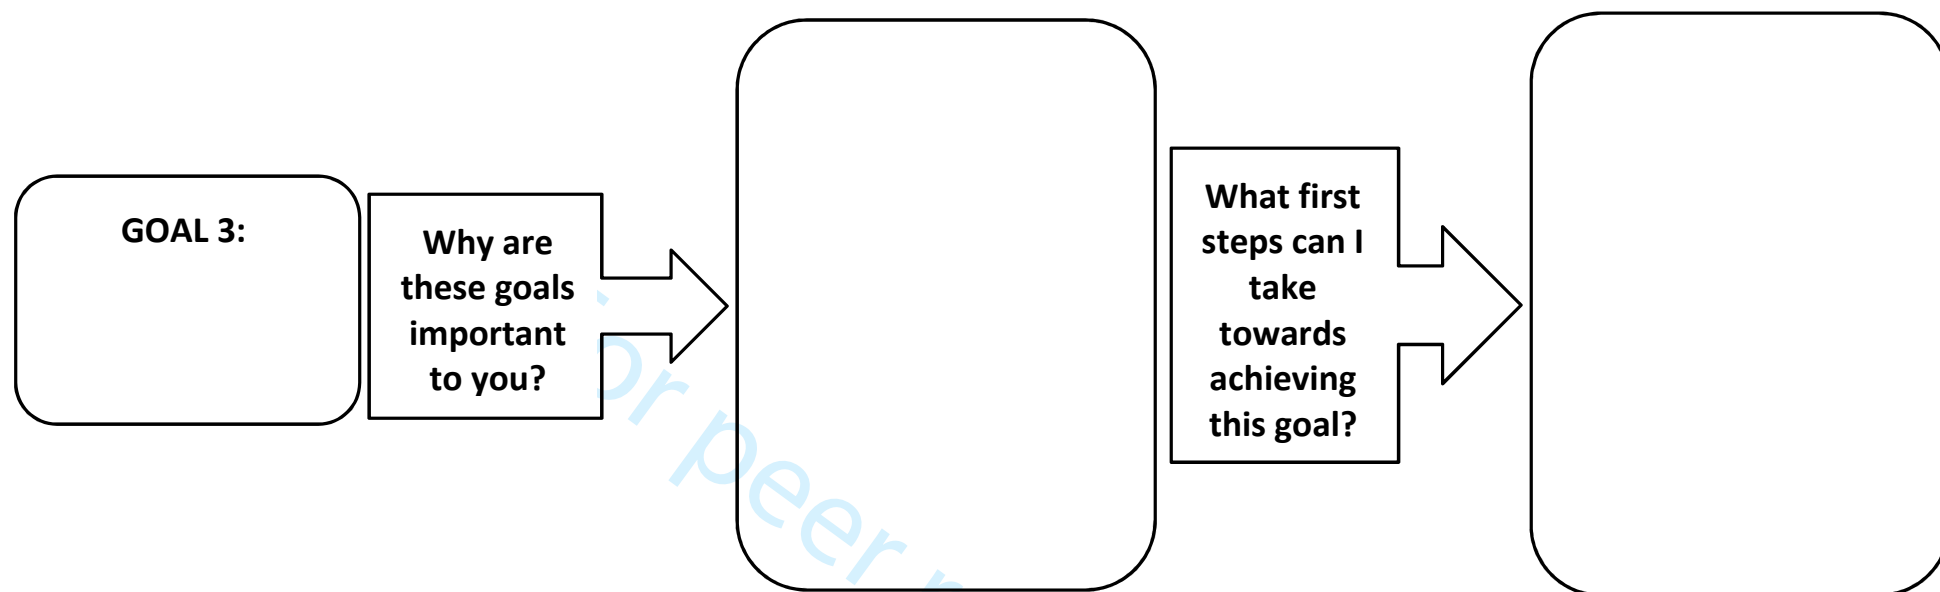

24 **Thank you for completing this goal-setting form. Please take it with you to your care plan appointment. Your GP will discuss**  
25 **it with you and together you will make specific plans to achieve your goals.**  
26  
27  
28  
29  
30  
31  
32  
33  
34  
35  
36  
37  
38  
39  
40  
41  
42  
43  
44  
45  
46  
47



# GoalPlan Study

## GAS-Light verbal scoring system



| Goal 1:                   |                                                                                        |                                                                                        | Tick                     |                          |
|---------------------------|----------------------------------------------------------------------------------------|----------------------------------------------------------------------------------------|--------------------------|--------------------------|
| <b>At Baseline</b>        | With respect to this goal do they have?                                                | Some attainment                                                                        | <input type="checkbox"/> |                          |
|                           |                                                                                        | No attainment<br>(as bad as they could be)                                             | <input type="checkbox"/> |                          |
| <b>At 6 month review:</b> | Yes  | A lot more                                                                             | <input type="checkbox"/> |                          |
|                           |                                                                                        | A little more                                                                          | <input type="checkbox"/> |                          |
|                           |                                                                                        | As expected                                                                            | <input type="checkbox"/> |                          |
|                           | Was the goal attained?                                                                 | No  | Partially attained       | <input type="checkbox"/> |
|                           |                                                                                        |                                                                                        | No change                | <input type="checkbox"/> |
|                           |                                                                                        |                                                                                        | Got worse                | <input type="checkbox"/> |

PTO for further goals

|                                                         |                                                                                        |                                            |                          |
|---------------------------------------------------------|----------------------------------------------------------------------------------------|--------------------------------------------|--------------------------|
| <b>Goal 2:</b>                                          |                                                                                        |                                            | Tick                     |
| <b>At Baseline</b>                                      | With respect to this goal do they have?                                                | Some attainment                            | <input type="checkbox"/> |
|                                                         |                                                                                        | No attainment<br>(as bad as they could be) | <input type="checkbox"/> |
| <b>At 6 month review:</b><br><br>Was the goal attained? | Yes 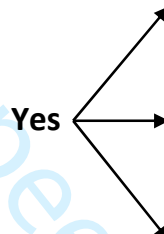  | A lot more                                 | <input type="checkbox"/> |
|                                                         |                                                                                        | A little more                              | <input type="checkbox"/> |
|                                                         |                                                                                        | As expected                                | <input type="checkbox"/> |
|                                                         | No  | Partially attained                         | <input type="checkbox"/> |
|                                                         |                                                                                        | No change                                  | <input type="checkbox"/> |
|                                                         |                                                                                        | Got worse                                  | <input type="checkbox"/> |

PTO for further goals

|                                                         |                                                                                        |                                            |                          |
|---------------------------------------------------------|----------------------------------------------------------------------------------------|--------------------------------------------|--------------------------|
| <b>Goal 3:</b>                                          |                                                                                        |                                            | Tick                     |
| <b>At Baseline</b>                                      | With respect to this goal do they have?                                                | Some attainment                            | <input type="checkbox"/> |
|                                                         |                                                                                        | No attainment<br>(as bad as they could be) | <input type="checkbox"/> |
| <b>At 6 month review:</b><br><br>Was the goal attained? | Yes 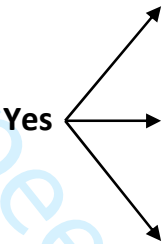  | A lot more                                 | <input type="checkbox"/> |
|                                                         |                                                                                        | A little more                              | <input type="checkbox"/> |
|                                                         |                                                                                        | As expected                                | <input type="checkbox"/> |
|                                                         | No  | Partially attained                         | <input type="checkbox"/> |
|                                                         |                                                                                        | No change                                  | <input type="checkbox"/> |
|                                                         |                                                                                        | Got worse                                  | <input type="checkbox"/> |



## CONSORT 2010 checklist of information to include when reporting a pilot or feasibility trial\*

| Section/Topic                    | Item No | Checklist item                                                                                                                                                                              | Reported on page No |
|----------------------------------|---------|---------------------------------------------------------------------------------------------------------------------------------------------------------------------------------------------|---------------------|
| <b>Title and abstract</b>        |         |                                                                                                                                                                                             |                     |
|                                  | 1a      | Identification as a pilot or feasibility randomised trial in the title                                                                                                                      | 1                   |
|                                  | 1b      | Structured summary of pilot trial design, methods, results, and conclusions (for specific guidance see CONSORT abstract extension for pilot trials)                                         | 2                   |
| <b>Introduction</b>              |         |                                                                                                                                                                                             |                     |
| Background and objectives        | 2a      | Scientific background and explanation of rationale for future definitive trial, and reasons for randomised pilot trial                                                                      | 4                   |
|                                  | 2b      | Specific objectives or research questions for pilot trial                                                                                                                                   | 4                   |
| <b>Methods</b>                   |         |                                                                                                                                                                                             |                     |
| Trial design                     | 3a      | Description of pilot trial design (such as parallel, factorial) including allocation ratio                                                                                                  | 5                   |
|                                  | 3b      | Important changes to methods after pilot trial commencement (such as eligibility criteria), with reasons                                                                                    | 5                   |
| Participants                     | 4a      | Eligibility criteria for participants                                                                                                                                                       | 5                   |
|                                  | 4b      | Settings and locations where the data were collected                                                                                                                                        | 5                   |
|                                  | 4c      | How participants were identified and consented                                                                                                                                              | 5                   |
| Interventions                    | 5       | The interventions for each group with sufficient details to allow replication, including how and when they were actually administered                                                       | 5-6                 |
| Outcomes                         | 6a      | Completely defined prespecified assessments or measurements to address each pilot trial objective specified in 2b, including how and when they were assessed                                | 6                   |
|                                  | 6b      | Any changes to pilot trial assessments or measurements after the pilot trial commenced, with reasons                                                                                        | 5                   |
|                                  | 6c      | If applicable, prespecified criteria used to judge whether, or how, to proceed with future definitive trial                                                                                 | NA                  |
| Sample size                      | 7a      | Rationale for numbers in the pilot trial                                                                                                                                                    | 5                   |
|                                  | 7b      | When applicable, explanation of any interim analyses and stopping guidelines                                                                                                                | NA                  |
| Randomisation:                   |         |                                                                                                                                                                                             |                     |
| Sequence generation              | 8a      | Method used to generate the random allocation sequence                                                                                                                                      | 5                   |
|                                  | 8b      | Type of randomisation(s); details of any restriction (such as blocking and block size)                                                                                                      | 5                   |
| Allocation concealment mechanism | 9       | Mechanism used to implement the random allocation sequence (such as sequentially numbered containers), describing any steps taken to conceal the sequence until interventions were assigned | 5                   |

|                                                      |     |                                                                                                                                                                                       |                   |
|------------------------------------------------------|-----|---------------------------------------------------------------------------------------------------------------------------------------------------------------------------------------|-------------------|
| Implementation                                       | 10  | Who generated the random allocation sequence, who enrolled participants, and who assigned participants to interventions                                                               | 5                 |
| Blinding                                             | 11a | If done, who was blinded after assignment to interventions (for example, participants, care providers, those assessing outcomes) and how                                              | NA                |
|                                                      | 11b | If relevant, description of the similarity of interventions                                                                                                                           | NA                |
| Statistical methods                                  | 12  | Methods used to address each pilot trial objective whether qualitative or quantitative                                                                                                | 6                 |
| <b>Results</b>                                       |     |                                                                                                                                                                                       |                   |
| Participant flow (a diagram is strongly recommended) | 13a | For each group, the numbers of participants who were approached and/or assessed for eligibility, randomly assigned, received intended treatment, and were assessed for each objective | Figure 1          |
|                                                      | 13b | For each group, losses and exclusions after randomisation, together with reasons                                                                                                      | Figure 1          |
| Recruitment                                          | 14a | Dates defining the periods of recruitment and follow-up                                                                                                                               | 6                 |
|                                                      | 14b | Why the pilot trial ended or was stopped                                                                                                                                              | NA                |
| Baseline data                                        | 15  | A table showing baseline demographic and clinical characteristics for each group                                                                                                      | Table 3           |
| Numbers analysed                                     | 16  | For each objective, number of participants (denominator) included in each analysis. If relevant, these numbers should be by randomised group                                          | Tables 4, 5 and 7 |
| Outcomes and estimation                              | 17  | For each objective, results including expressions of uncertainty (such as 95% confidence interval) for any estimates. If relevant, these results should be by randomised group        | Table 7           |
| Ancillary analyses                                   | 18  | Results of any other analyses performed that could be used to inform the future definitive trial                                                                                      | NA                |
| Harms                                                | 19  | All important harms or unintended effects in each group (for specific guidance see CONSORT for harms)                                                                                 | 9                 |
|                                                      | 19a | If relevant, other important unintended consequences                                                                                                                                  | NA                |
| <b>Discussion</b>                                    |     |                                                                                                                                                                                       |                   |
| Limitations                                          | 20  | Pilot trial limitations, addressing sources of potential bias and remaining uncertainty about feasibility                                                                             | 11-12             |
| Generalisability                                     | 21  | Generalisability (applicability) of pilot trial methods and findings to future definitive trial and other studies                                                                     | 11-12             |
| Interpretation                                       | 22  | Interpretation consistent with pilot trial objectives and findings, balancing potential benefits and harms, and considering other relevant evidence                                   | 11-12             |
|                                                      | 22a | Implications for progression from pilot to future definitive trial, including any proposed amendments                                                                                 | 11-12             |
| <b>Other information</b>                             |     |                                                                                                                                                                                       |                   |
| Registration                                         | 23  | Registration number for pilot trial and name of trial registry                                                                                                                        | 1                 |
| Protocol                                             | 24  | Where the pilot trial protocol can be accessed, if available                                                                                                                          | 1                 |
| Funding                                              | 25  | Sources of funding and other support (such as supply of drugs), role of funders                                                                                                       | 13                |
|                                                      | 26  | Ethical approval or approval by research review committee, confirmed with reference number                                                                                            | 5                 |

1  
2 Citation: Eldridge SM, Chan CL, Campbell MJ, Bond CM, Hopewell S, Thabane L, et al. CONSORT 2010 statement: extension to randomised pilot and feasibility trials. BMJ. 2016;355.  
3 \*We strongly recommend reading this statement in conjunction with the CONSORT 2010, extension to randomised pilot and feasibility trials, Explanation and Elaboration for important  
4 clarifications on all the items. If relevant, we also recommend reading CONSORT extensions for cluster randomised trials, non-inferiority and equivalence trials, non-pharmacological  
5 treatments, herbal interventions, and pragmatic trials. Additional extensions are forthcoming: for those and for up to date references relevant to this checklist, see [www.consort-statement.org](http://www.consort-statement.org).  
6  
7  
8  
9  
10  
11  
12  
13  
14  
15  
16  
17  
18  
19  
20  
21  
22  
23  
24  
25  
26  
27  
28  
29  
30  
31  
32  
33  
34  
35  
36  
37  
38  
39  
40  
41  
42  
43  
44  
45  
46  
47

For peer review only

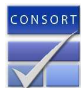

## CONSORT 2010 checklist of information to include when reporting a pilot or feasibility randomized trial in a journal or conference abstract

| Item               | Description                                                                                                 | Reported on line number |
|--------------------|-------------------------------------------------------------------------------------------------------------|-------------------------|
| Title              | Identification of study as randomised pilot or feasibility trial                                            | 1                       |
| Authors *          | Contact details for the corresponding author                                                                | 1                       |
| Trial design       | Description of pilot trial design (eg, parallel, cluster)                                                   | 2                       |
| Methods            |                                                                                                             |                         |
| Participants       | Eligibility criteria for participants and the settings where the pilot trial was conducted                  | 2                       |
| Interventions      | Interventions intended for each group                                                                       | 2                       |
| Objective          | Specific objectives of the pilot trial                                                                      | 2                       |
| Outcome            | Prespecified assessment or measurement to address the pilot trial objectives**                              | 2                       |
| Randomization      | How participants were allocated to interventions                                                            | 2                       |
| Blinding (masking) | Whether or not participants, care givers, and those assessing the outcomes were blinded to group assignment | 2                       |
| Results            |                                                                                                             |                         |
| Numbers randomized | Number of participants screened and randomised to each group for the pilot trial objectives**               | 2                       |
| Recruitment        | Trial status†                                                                                               |                         |
| Numbers analysed   | Number of participants analysed in each group for the pilot objectives**                                    | 2                       |
| Outcome            | Results for the pilot objectives, including any expressions of uncertainty**                                | 2                       |
| Harms              | Important adverse events or side effects                                                                    | 2                       |
| Conclusions        | General interpretation of the results of pilot trial and their implications for the future definitive trial | 2                       |
| Trial registration | Registration number for pilot trial and name of trial register                                              | 1                       |
| Funding            | Source of funding for pilot trial                                                                           | 13                      |

Citation: Eldridge SM, Chan CL, Campbell MJ, Bond CM, Hopewell S, Thabane L, et al. CONSORT 2010 statement: extension to randomised pilot and feasibility trials. *BMJ*. 2016;355.

*\*this item is specific to conference abstracts*

*\*\*Space permitting, list all pilot trial objectives and give the results for each. Otherwise, report those that are a priori agreed as the most important to the decision to proceed with the future definitive RCT.*

*†For conference abstracts.*

# BMJ Open

## Can goal-setting for patients with multimorbidity improve outcomes in primary care?: cluster randomised feasibility trial

|                                 |                                                                                                                                                                                                                                                                                                                                                                                                                                                                                                                                                                                                                                                                                                                                                                                                                                                                                                                                                                                                                                                                                                                                                         |
|---------------------------------|---------------------------------------------------------------------------------------------------------------------------------------------------------------------------------------------------------------------------------------------------------------------------------------------------------------------------------------------------------------------------------------------------------------------------------------------------------------------------------------------------------------------------------------------------------------------------------------------------------------------------------------------------------------------------------------------------------------------------------------------------------------------------------------------------------------------------------------------------------------------------------------------------------------------------------------------------------------------------------------------------------------------------------------------------------------------------------------------------------------------------------------------------------|
| Journal:                        | <i>BMJ Open</i>                                                                                                                                                                                                                                                                                                                                                                                                                                                                                                                                                                                                                                                                                                                                                                                                                                                                                                                                                                                                                                                                                                                                         |
| Manuscript ID                   | bmjopen-2018-025332.R2                                                                                                                                                                                                                                                                                                                                                                                                                                                                                                                                                                                                                                                                                                                                                                                                                                                                                                                                                                                                                                                                                                                                  |
| Article Type:                   | Research                                                                                                                                                                                                                                                                                                                                                                                                                                                                                                                                                                                                                                                                                                                                                                                                                                                                                                                                                                                                                                                                                                                                                |
| Date Submitted by the Author:   | 08-Mar-2019                                                                                                                                                                                                                                                                                                                                                                                                                                                                                                                                                                                                                                                                                                                                                                                                                                                                                                                                                                                                                                                                                                                                             |
| Complete List of Authors:       | Ford, John; University of East Anglia, Faculty of Medicine and Health Sciences<br>Lenaghan, E; University of East Anglia, Faculty of Medicine and Health Sciences<br>Salter, Charlotte; University of East Anglia, Faculty of Medicine and Health Sciences<br>Turner, David; University of East Anglia, Faculty of Medicine and Health Sciences<br>Shiner, A.; University of East Anglia, Faculty of Medicine and Health Sciences<br>Clark, Allan; University of East Anglia, Faculty of Medicine and Health Sciences<br>Murdoch, Jamie; University of East Anglia, Faculty of Medicine and Health Sciences<br>Green, Carole<br>James, Sarah; University of East Anglia, Faculty of Medicine and Health Sciences<br>Koopmans, Imogen; University of East Anglia, Faculty of Medicine and Health Sciences<br>Lipp, Alistair; NHS England Midlands & East,, West Wing<br>Moseley, Annie<br>Wade, Tom; University of East Anglia, Faculty of Medicine and Health Sciences<br>Winterburn, Sandra; University of East Anglia, Faculty of Medicine and Health Sciences<br>Steel, Nicholas; University of East Anglia, Faculty of Medicine and Health Sciences |
| <b>Primary Subject Heading</b>: | Public health                                                                                                                                                                                                                                                                                                                                                                                                                                                                                                                                                                                                                                                                                                                                                                                                                                                                                                                                                                                                                                                                                                                                           |
| Secondary Subject Heading:      | General practice / Family practice                                                                                                                                                                                                                                                                                                                                                                                                                                                                                                                                                                                                                                                                                                                                                                                                                                                                                                                                                                                                                                                                                                                      |
| Keywords:                       | PRIMARY CARE, HEALTH SERVICES ADMINISTRATION & MANAGEMENT, SOCIAL MEDICINE                                                                                                                                                                                                                                                                                                                                                                                                                                                                                                                                                                                                                                                                                                                                                                                                                                                                                                                                                                                                                                                                              |
|                                 |                                                                                                                                                                                                                                                                                                                                                                                                                                                                                                                                                                                                                                                                                                                                                                                                                                                                                                                                                                                                                                                                                                                                                         |



1  
2  
3  
4  
5  
6  
7  
8  
9  
10  
11  
12  
13  
14  
15  
16  
17  
18  
19  
20  
21  
22  
23  
24  
25  
26  
27  
28  
29  
30  
31  
32  
33  
34  
35  
36  
37  
38  
39  
40  
41  
42  
43  
44  
45  
46  
47  
48  
49  
50  
51  
52  
53  
54  
55  
56  
57  
58  
59  
60

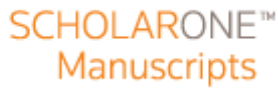

1  
2  
3 1 **Title**

4  
5 2 **Can goal-setting for patients with multimorbidity improve outcomes in primary care?: cluster**  
6 3 **randomised feasibility trial**  
7  
8 4

9  
10 5 **Authors**

11  
12 6 John A. Ford<sup>1</sup>, Elizabeth Lenaghan<sup>1</sup>, Charlotte Salter<sup>1</sup>, David A. Turner<sup>1</sup>, Alice Shiner<sup>1</sup>, Allan Clark<sup>1</sup>,  
13 7 Jamie Murdoch<sup>1</sup>, Carole Green<sup>2\*</sup>, Sarah James<sup>1\*</sup>, Imogen Koopmans<sup>1\*</sup>, Alistair Lipp<sup>3\*</sup>, Annie  
14 8 Moseley<sup>2\*</sup>, Tom Wade<sup>1\*</sup>, Sandra Winterburn<sup>1\*</sup>, Nicholas Steel<sup>1</sup>

15  
16 9 \*Authors listed alphabetically

17  
18 10 <sup>1</sup>Faculty of Medicine and Health Sciences, University of East Anglia, Norwich, UK

19  
20 11 <sup>2</sup> Patient and Public Involvement Representative, Norwich, UK

21  
22 12 <sup>3</sup> NHS England  
23  
24 13

25 14 **Corresponding author**

26 15 Prof Nicholas Steel

27  
28 16 Norwich Medical School

29 17 University of East Anglia

30 18 Chancellor's Drive

31 19 Norwich

32 20 NR4 7TJ

33 21 [n.steel@uea.ac.uk](mailto:n.steel@uea.ac.uk)

34 22 01603 591161  
35  
36  
37  
38  
39  
40  
41  
42  
43  
44  
45  
46  
47  
48  
49  
50  
51  
52  
53  
54  
55  
56  
57  
58  
59  
60

23  
24  
25 *Trials registration:*

26 Title: Goal-setting in care planning for people with multimorbidity

27 Trial ID: ISRCTN13248305

28 Date registered: 21/12/2016

29 Link: <http://www.isrctn.com/ISRCTN13248305>

30  
31 *Protocol:* Available at:

32 [http://www.uea.ac.uk/documents/246046/14839702/GoalPlan+Research+Protocol+v1.2+170316.p](http://www.uea.ac.uk/documents/246046/14839702/GoalPlan+Research+Protocol+v1.2+170316.pdf/86549c5b-c4ed-435b-8719-4c3160f9793f)  
33 [df/86549c5b-c4ed-435b-8719-4c3160f9793f](http://www.uea.ac.uk/documents/246046/14839702/GoalPlan+Research+Protocol+v1.2+170316.pdf/86549c5b-c4ed-435b-8719-4c3160f9793f)

34  
35 *Word count:* 4173

36  
37 *Keywords:* goals, multimorbidity, primary health care, patient-centred care, randomized controlled  
38 trial

1  
2  
3 40 **Abstract**

4  
5 41 Introduction

6  
7 42 Goal-setting is recommended for patients with multimorbidity, but there is little evidence to support  
8 43 its use in general practice.

9  
10 44 Objective

11  
12 45 To assess the feasibility of goal-setting for patients with multimorbidity, before undertaking a  
13 46 definitive trial.

14  
15 47 Design and setting

16  
17 48 Cluster-randomised controlled feasibility trial of goal-setting compared to control in six general  
18 49 practices.

19  
20 50 Participants

21  
22 51 Adults with 2 or more long term health conditions and at risk of unplanned hospital admission.

23  
24 52 Interventions

25  
26 53 General Practitioners (GPs) underwent training and patients were asked to consider goals before an  
27 54 initial goal-setting consultation and a follow-up consultation six months later. The control group  
28 55 received usual care planning.

29  
30 56 Outcome measures

31  
32 57 Health-related quality of life (EQ5D5L), capability (ICEpop CAPability measure for Older people  
33 58 (ICECAP-O)), patient assessment of chronic illness care (PACIC) and health care use. All consultations  
34 59 were video or audio-recorded, and focus groups were held with participating GPs and patients.

35  
36 60 Results

37  
38 61 Fifty-two participants were recruited with a response rate of 12%. Full follow-up data were available  
39 62 for 41. In the goal-setting group, mean age was 80.4 years 54% were female and the median number  
40 63 of prescribed medications was 13, compared to 77.2 years, 39% female and 11.5 medications in the  
41 64 control group. The mean initial consultation time was 23.0 minutes in the goal-setting group and  
42 65 19.2 in the control group. Overall 28% of patient participants had no cognitive impairment.  
43 66 Participants set between one and three goals on a wide range of subjects, such as chronic disease  
44 67 management, walking, maintaining social and leisure interests, and weight management. Patient  
45 68 participants found goal-setting acceptable and would have liked more frequent follow-up. GPs  
46 69 unanimously liked goal-setting, felt it delivered more patient-centred care and highlighted the  
47 70 importance of training.

48  
49  
50 71 Conclusions

51  
52 72 This goal-setting intervention was feasible to deliver in general practice. A larger, definitive study is  
53 73 needed to test its effectiveness.

54  
55  
56  
57  
58  
59  
60

1  
2  
3 74 **Strengths and limitations of this study**  
4  
5 75  
6 76  
7 77

- 8 78
- General practitioners and patients with multimorbidities both benefit from preparation before setting goals
  - Recruitment reached target levels in five of six practices, but the patient response rate of 12% means that a definitive study will need sufficient numbers of patients with multimorbidity
  - Existing measures of patient centred care are usually designed for a single specific treatment decision and were difficult to apply to goal setting consultations, where several goals were discussed
  - The most relevant outcome measure for goal setting was the patient assessment of chronic illness care (PACIC), which includes a sub-scale for goal setting
  - Qualitative data from video-recorded consultations and focus groups were vital to understand how goal-setting was implemented in practice, and how acceptable it was to GPs and patients.
- 9 79  
10 80  
11 81  
12 82  
13 83  
14 84  
15 85  
16 86  
17 87  
18  
19  
20  
21  
22  
23  
24  
25  
26  
27  
28  
29  
30  
31  
32  
33  
34  
35  
36  
37  
38  
39  
40  
41  
42  
43  
44  
45  
46  
47  
48  
49  
50  
51  
52  
53  
54  
55  
56  
57  
58  
59  
60

## 88 Introduction

89 The rising number of long-term conditions and prescribed medications has increased the burden of  
90 treatment for patients [1 2]. People with multimorbidity (defined as two or more chronic conditions  
91 [2]) tend to have a lower quality of life and worse health than those with single conditions [3].  
92 Medical outcomes that work well for relatively healthy patients (e.g. blood pressure control, or  
93 disease-free survival) may be inappropriate for patients with multimorbidity or severe disability [4  
94 5], and the use of current single-disease guidelines in this group can encourage harmful  
95 polypharmacy with resulting drug-drug and drug-disease interactions [6].

96 The National Institute for Health and Care Excellence (NICE) recommends an approach to care that  
97 takes account of multimorbidity by establishing patient goals, values and priorities [7]. Goal setting is  
98 the sharing of realistic goals by health professionals and patients and agreement of the best course  
99 of action [8]. Goal setting enables patients and doctors to focus health care on the outcomes that  
100 are most important to the patient. Examples of outcomes that matter to patients may include  
101 maintaining independence, undertaking paid or voluntary work, preventing adverse outcomes (e.g.  
102 falls) and reducing treatment burden [7]. Despite the recommendation that health professionals  
103 should establish patient goals with individuals with multimorbidity, there is little evidence to support  
104 the use of goal-setting between general practitioners and patients, and it is rarely used in primary  
105 care [8-10]. The goal setting approach is more likely to be effective if it incorporates shared decision  
106 making, the process by which health professionals and patients make decisions together based on  
107 the best available evidence [11], because the goals and actions agreed will be more patient-centred  
108 leading to greater engagement in the process by patients. The difference is that shared decision  
109 making is usually concerned with specific clinical treatment decisions, whereas goal setting usually  
110 involves a wider discussion around ways to deliver outcomes that matter to the patient.

111 Goal-setting should be, but rarely is, an important element of the care planning process in the UK.  
112 For the purposes of this study, we define care planning as 'a conversation in which patients and  
113 clinicians agree on goals and actions for managing the patient's conditions' [8]. For patients with  
114 long term health conditions, personalised care planning has been found to improve physical and  
115 psychological health, in addition improving capability to self-manage, compared to usual care [8]. A  
116 recent systematic review highlighted the need for evidence exploring 'the effects of personalised  
117 care planning on goal-attainment, especially patient's personal goals as opposed to goals  
118 determined by clinicians or researchers' [12].

119 Our goal-setting intervention was designed within the context of a national recommendation that  
120 the top 2% of patients at risk of unplanned hospital admission should have a care plan [13]. We  
121 wanted to find out if a consultation focussed on goal-setting would improve outcomes for this  
122 patient group, compared to control consultations (the usual care planning process undertaken in UK  
123 primary care which rarely includes goal setting). Before we could conduct a full trial to answer this  
124 question, we needed to answer questions about the feasibility of such a trial. We aimed to assess  
125 the feasibility of goal-setting for patients with multimorbidity, at high risk of hospital admission and  
126 eligible for a care planning consultation, with a view to undertaking a future definitive randomised  
127 controlled trial. Our objectives were to assess participant recruitment and retention, the  
128 acceptability of a goal-setting intervention to patients and GPs, the training needs of GPs, the  
129 content of control consultations, goal-setting and the feasibility of collecting relevant outcome  
130 measures.

## 131 **Methods**

132 We undertook a cluster randomised controlled feasibility trial of goal-setting compared to usual care  
133 in six general practices in the United Kingdom, with six months follow-up. Six months was long  
134 enough for patients and GPs to work towards the agreed goals, but not so long that the goals would  
135 have been forgotten. There were no significant changes to the protocol [14]. Research ethics  
136 approval was obtained from the NHS Research Ethics Committee (16/EM/0411). Participants were  
137 recruited between April and May 2017 and follow-up completed in February 2018.

138  
139 General practices were invited via two emails through the East of England Clinical Research Network  
140 and recruited on a first-come first-served basis. To be eligible, practices had to be using risk  
141 stratification to identify patients at high risk of unplanned admission (for example by participating in  
142 the Avoiding Unplanned Admissions Enhanced Service: proactive case finding and patient review for  
143 vulnerable people [13]), have at least one Good Clinical Practice trained GP and nurse, be able to  
144 nominate two GPs to attend the goal-setting training and not be a single handed practice. Practices  
145 were reimbursed for staff time and travel to undertake the research and deliver the intervention.  
146 Patients were eligible if they were aged 18 or over, identified as in the top 2% for risk of unplanned  
147 admission and diagnosed with at least two of 40 morbidities in Barnett's analysis of multimorbidity  
148 [2]. Patients were excluded if they were deemed to be unable to participate in goal-setting in the  
149 GP's professional opinion (e.g. advanced dementia or acute psychosis), had received a care planning  
150 consultation in the previous three months, or required translation services to communicate verbally.

151 Practice administrators searched their electronic patient register according to the eligibility criteria,  
152 and a GP then checked the resulting patient list for exclusion criteria. Eligible patients were sent a  
153 letter of invitation and participant information leaflet, with the intention of recruiting 10 patients  
154 per practice. The number of eligible patients ranged from 47 to 124 and all were invited. The  
155 protocol allowed GPs to opportunistically invite patients they thought might be interested, however  
156 no patients were recruited through this process. A study researcher visited interested patients at  
157 home to discuss the study and obtain written informed consent.

158 The Norwich Clinical Trials Unit independently randomised three practices to goal-setting and three  
159 to control, by simple block randomisation using a 1:1 ratio and sealed opaque envelopes. Practices  
160 were randomised after at least 10 expressions of interest were received from patients. It was not  
161 possible to blind participants, health professionals or researchers due to the nature of the  
162 intervention, with the exception of the statistician undertaking the analysis, who was blinded to the  
163 allocation.

### 164 *Intervention*

165 Both intervention and control practices identified two GPs to either attend the training and deliver  
166 goal setting consultations or deliver control consultations, although in one intervention practice  
167 (Practice 3) only one GP was able to attend. Therefore five participating GPs from practices allocated  
168 to goal-setting (see Table 1) received training in a three hour experiential workshop, led by senior  
169 consultation skills tutors (CS and SW) and a GP with experience in communication skills training (AS).  
170 One other GP attended the training but withdrew prior to delivering the intervention for personal  
171 reasons. The training model we developed for goal setting adapted relevant elements of the work of  
172 Elwyn and colleagues on shared decision making [15 16] and of patient-centred care in the leading  
173 training model in clinical communication (the Calgary Cambridge Guide [17]). Our model adopted a  
174 structured, patient-centred stepped approach. Steps included preparation, goal elicitation, assessing

1  
2  
3 175 options, making goals smart, decision-making and evaluation. Following an introduction to the  
4 176 study, the training was mainly experiential to enable GPs to rehearse existing skills and integrate  
5 177 additional skills for facilitating the goal-setting process. Experiential methods included role-play,  
6 178 video analysis and interactive skill spotting . GPs were trained in groups of three and were given a  
7 179 detailed handbook in advance. The handbook contained information about the study and a “how to”  
8 180 guide for goal-setting, including theoretical background and examples of goal setting. The control  
9 181 group GPs received no training for this study and were asked to undertake a care planning  
10 182 consultation as they would usually do in routine clinical practice. This may have involved a national  
11 183 care planning template, which does not include goal setting, from the Avoiding Unplanned  
12 184 Admissions Enhanced Service [13].

15  
16 185 A study researcher discussed goal-setting and the associated paperwork with participants during the  
17 186 face-to-face baseline visit, which lasted approximately 15 minutes. The researcher gave all patient  
18 187 participants a patient-held goal-setting sheet (PGS), with questions to consider prior to their  
19 188 consultation. The questions (Supplementary Appendix 1) were:

- 21 189
- 22 190 • What are your goals? What is important to you? What do you really want to achieve over
  - 23 191 the next six months?
  - 24 192 • Why are these goals important to you?
  - 25 193 • What are the first steps you would like to take towards achieving this goal or goals?

26  
27 193 The goal-setting consultations were held with the participating GPs even if they were different from  
28 194 the patient’s usual GP. During the initial goal-setting consultation GPs, in partnership with  
29 195 participants, documented the goals which had been agreed. GPs then provided support, within their  
30 196 clinical expertise and with the help of other health care professionals, to help patients achieve their  
31 197 goals, for example by providing information on local groups and services. Participants in both the  
32 198 goal-setting and control groups had an initial consultation which lasted about 20 minutes, but only  
33 199 patients in the goal-setting arm were invited back for a follow-up consultation after six months to  
34 200 discuss their goal attainment.

### 37 201 *Data and statistical analysis*

39 202 We collected quantitative and qualitative data to meet the feasibility study objectives. Data  
40 203 collected from patients during a researcher visit at baseline and six months were: health-related  
41 204 quality of life (EQ-5D-5L [18]); capability (as measured through the five attributes of attachment,  
42 205 security, role, enjoyment and control in the ICEpop CAPability measure for Older people  
43 206 questionnaire (ICECAP-O) [19])(ICEPOP is the name of the UK MRC-funded programme through  
44 207 which the index was developed), cognition (general practitioner assessment of cognition scale (GP-  
45 208 COG) [20]) and patient centred care (patient assessment of care for chronic conditions scale (PACIC)  
46 209 [21]). Data collected from the electronic patient record included age, sex and postcode Index of  
47 210 Multiple Deprivation (IMD) score (baseline only), medications on repeat prescription, diagnoses,  
48 211 achievement of relevant quality of care indicators in the Quality and Outcomes Framework [22] and  
49 212 primary and secondary care use (see health economic section below for more details). Practice data  
50 213 were collected before randomisation and patient data were collected after.

54 214 GPs and patient participants were asked to complete an assessment of shared decision making  
55 215 during each consultation using the CollaboRATE scale [23] for patients and dyadic OPTION scale [24]  
56 216 for GPs. GPs and patients in the goal-setting group were asked to discuss and complete a goal  
57 217 attainment scaling (GAS-Light) questionnaire [25] (See Supplementary Appendix 2) at the second  
58  
59  
60



218 consultation. Goal attainment was scored using the following system: -1 = worse than expected, 0 =  
219 no change, 1 = partially attained, 2 = as expected, 3 = a little more and 4 = a lot more than expected.

220 All initial consultations were video (n=41) or audio (n=4) recorded and transcribed. Three team  
221 members scored the consultations using the observer OPTION measure to assess shared decision  
222 making [26]. One focus group was held with patients and one with GPs from the goal-setting group  
223 at the end of the six month follow-up period to discuss perspectives, experiences and overall  
224 acceptability of the goal-setting intervention. All patients in the intervention group were sent a letter  
225 of invitation to the focus group, except two who indicated at the researcher visit they did not want  
226 to take part. Both focus groups lasted about 90 minutes, were held at the university, guided by a  
227 topic guide, audio-recorded and transcribed. Patient or GP participants unable to attend the focus  
228 groups were interviewed by phone or face-to-face using the same topic guide.

229 We calculated the recruitment rate by practice and by randomisation group. Demographic variables  
230 were compared for those recruited and those not recruited. The characteristics of baseline  
231 consultations were summarised both by practice and by intervention group.

232 The change in outcome measures from baseline to follow-up was summarised using descriptive  
233 statistics by randomisation group. We estimated the difference between randomisation groups using  
234 a linear mixed model with practice included as a random effect. This would allow the estimation of  
235 potential differences in a full-scale trial. The intra cluster correlation coefficient was estimated for  
236 each outcome, however great care should be taken in the interpretation of these due to the small  
237 number of clusters [27]. All statistical analyses were undertaken using Stata version 15.

### 238 *Health economic evaluation*

239 Data were collected on resource use from an NHS perspective to test data collection processes and  
240 to inform a future health economic evaluation estimating quality adjusted life years (QALYs). A  
241 record was kept of resources required to provide GP training, as well as the length of initial and  
242 follow-up goal-setting consultations. Additional health care resource use was extracted from  
243 electronic health records by practices supported by a study researcher (EL) for the six-months prior  
244 to randomisation and from randomisation to follow-up. Health care use was collected for: day-case  
245 and inpatient hospital admissions; outpatient visits; accident and emergency visits (A&E);  
246 consultations at the GP practice (GP, practice nurse, health care assistant, nurse practitioners); and  
247 other contacts, such as district nursing, allied health professional contacts, ambulance call outs, and  
248 specialist nursing contacts.

249 Resource use was costed using the NHS reference costs [28] for secondary care and a published  
250 source for primary care contacts [29]. NHS reference costs were used to estimate a weighted  
251 average cost for day cases, non-elective short stay, non-elective long stay, and elective admissions.  
252 For longer stays, additional days were costed using a weighted average of all excess bed day costs.  
253 For the first and second GP consultations in the goal-setting group, we had data on length of  
254 consultation and setting. The cost of providing training was estimated from a description given by  
255 the study researcher of duration and required staff. The cost of academic staff time was estimated  
256 using University pay scales (including employer's national insurance and superannuation payments).  
257 As the training would have relevance beyond the duration of the study, we estimated a useful life of  
258 3 years and calculated an annual equivalent cost [30]. All costs are in 2015/16 UK pounds sterling. As  
259 the duration of the study was six-months, we did not discount costs and benefits. As the study size  
260 was very small with great variability in estimates of cost and effect, we did not estimate formal cost-  
261 effectiveness.



1  
2  
3 262 *Qualitative analysis*  
4

5 263 The video and audio recordings of control and goal-setting consultations were compared by the  
6 264 research team (CS, EL, AS, JM and RH) to measure duration and explore the content and  
7 265 methodological implications for a future study. An in-depth analysis of the consultations using a  
8 266 conversation analytic informed approach [31] is reported elsewhere [32].

9  
10 267 A thematic framework-based analysis was used to analyse the focus groups recordings and  
11 268 transcripts [33] to assess the acceptability of the goal-setting intervention to patients and GPs and  
12 269 possible future improvements to the goal-setting intervention, training and trial design.

13  
14  
15 270 *Patient and Public Involvement (PPI)*  
16

17 271 Four individuals contributed to patient and public involvement (CG, RH, AM, HS). Two PPI  
18 272 representatives contributed to the design of the research as co-applicants on the initial application  
19 273 for funding (AM and HS) and steering group membership (AM and CG). PPI members contributed to  
20 274 the analysis and interpretation of the results, with one PPI representative reviewing and scoring  
21 275 video consultations using OPTION (RH) and a further two reviewing a selection of video consultation  
22 276 transcripts (AM and CG). Two PPI members reviewed and commented on the manuscript and are co-  
23 277 authors (AM and CG).  
24  
25  
26  
27  
28  
29  
30  
31  
32  
33  
34  
35  
36  
37  
38  
39  
40  
41  
42  
43  
44  
45  
46  
47  
48  
49  
50  
51  
52  
53  
54  
55  
56  
57  
58  
59  
60

## 278 Results

### 279 *Recruitment and retention*

280 Sixty general practices were invited with seven expressing interest and six being recruited (Figure 1).  
281 Across the six practices (Table 1), 550 patients met the eligibility criteria and were invited. In total,  
282 52 patients were recruited with 24 belonging to practices randomised to goal-setting and 28 to  
283 practices in the control group. Thirteen patients were held in reserve from three practices which had  
284 recruited enough patients. The response rate was 12%  $((52+13)/550)$ . There was little variation in  
285 age, sex and deprivation between those who participated and those who did not (Supplementary  
286 Table 1). Two participants in the goal-setting group and five in the control group did not receive the  
287 initial consultation because they declined to attend, were unavailable or withdrew consent. Four  
288 participants in the goal-setting group did not receive the follow-up consultation because of ill health  
289 or death. Data collected directly from participants were available for 18 participants in the goal-  
290 setting group and 23 in the control group. Participant data collected from practices were available  
291 for 23 participants in the goal-setting group and 28 in the control group. Recruitment of practices  
292 took place between December 2016 and February 2017 and recruitment of patients between April  
293 and May 2017.

294 The control practices were in more urbanised areas with larger practice populations and more  
295 female GPs participating compared to goal-setting practices (Table 1). The goal-setting group,  
296 compared to control (see Table 2), had more patient participants who were female (54% compared  
297 to 29%), older (80 years old compared to 77), with a higher number of health problems (5 compared  
298 to 4) and medications (13.0 compared to 11.5), but similar quality of life. The control group had  
299 participants spread across all four IMD quartiles, whereas the goal-setting group had participants in  
300 only the second and third quartiles. All participants were white British and retired, except for one  
301 participant in the goal-setting group who was of working age but not employed and one in the  
302 control group who was self-employed. There was variation in participant baseline characteristics  
303 between practices in mean age (range 69.5 to 85.8 years old), proportion of females (range 25% to  
304 73%), number of medications (range 10.0 to 15.5) and number of health problems (range 3.0 to 7.5)  
305 across participating practices.

306 The mean initial consultation time in the goal-setting group was 23.0 minutes and in the control  
307 group was 19.2 minutes (Table 3). GPs in the intervention group saw a mean of 4.4 patients (range 4  
308 to 5), whereas GPs in the control group saw a mean of 3.8 patients (range 2 to 7). Patients spoke  
309 more in the goal-setting group initial consultation (mean GP:patient word count ratio (WCR) 1.35)  
310 than the control group (WCR 1.52), but this was not statistically significant. Dyadic OPTION scores for  
311 GPs perceptions of shared decision making were not statistically significantly higher in the goal-  
312 setting group compared to the control group, and collaboRATE scores were similar. Observer  
313 OPTION scores showed large variation and inconsistency in scoring between the three research team  
314 members (data not presented).

315 Most patients set two or three goals (Table 4) in the goal setting intervention arm, with GPs and  
316 patients setting on average one more goal in Practice 1 than in Practice 3. The commonest types of  
317 goals were related to management of chronic conditions, walking, maintaining social and leisure  
318 interests and weight management (Table 5). Forty-two of the 50 goals were scored with a mean  
319 attainment score per patient of 1.45 (1= partially attained and 2= as expected) with 'partially  
320 attained' being the commonest outcome (Table 4).

1  
2  
3 321 In the control arm, goals were rarely mentioned. Four usual-care GPs followed the care planning  
4 322 template recommended within the Avoiding Unplanned Admissions enhanced service [13], one GP  
5 323 appeared to treat it as a normal problem-focused consultation and another GP focused solely on end  
6 324 of life issues.

### 8 9 325 *Outcome measures*

10 326 As expected in this small feasibility study, there were no statistically significant differences between  
11 327 goal-setting and control from baseline to follow-up in PACIC score, health-related quality of life as  
12 328 measured by EQ5D, number of medications or GPCOG score (Table 6 which also shows the intra-  
13 329 class correlation coefficients). Capability as measured by ICECAP-O at six months, improved slightly  
14 330 more in the control group than in the goal-setting group, but the 95% confidence interval includes  
15 331 zero (mean difference between groups -0.08, 95% CI -0.15 to -0.00).

18 332 There was considerable variation in health care use in the six months prior to randomisation and six  
19 333 months follow-up (Table 7). Most health care contact increased in both the control and goal-setting  
20 334 groups, but district nurse contacts increased and inpatient admissions decreased only in the goal-  
21 335 setting group. Quality and Outcomes Framework data were collected at baseline and follow-up, but  
22 336 the results were uninformative due to low numbers and low variability (Supplementary Table 2).

23 337 There was one death in the goal-setting group due to cancer, which was judged to be unrelated to  
24 338 the intervention. The estimated cost of the goal-setting was £147 per patient, of which £95 related  
25 339 to costs of providing initial and follow-up GP consultations, and £43 related to the cost of GP  
26 340 training. There was a small cost for the study researcher to explain goal-setting. A mean cost of £50  
27 341 per patient was incurred in the control group for the initial consultation. The single largest cost for  
28 342 the six-months prior to recruitment and the six-months of follow-up was inpatient stays (Table 7).  
29 343 There were also substantial costs in other settings, for example in general practice contacts and  
30 344 district nurse services. The types, number and associated costs of health service use varied  
31 345 considerably, as would be expected in a feasibility study.

### 36 346 *Acceptability*

37  
38 347 Eleven patients expressed interest in the focus group but only six were able to attend on the  
39 348 selected date. Two patients who were unable to attend took part in a telephone interview. Of the  
40 349 five GPs who deliver the intervention, four attended the focus group and one was unable to attend,  
41 350 so was interviewed face-to-face at the GP surgery. All six patient participants attending the focus  
42 351 group reported positive experiences and views of the intervention, particularly regarding the  
43 352 different emphasis of the consultation. Participants spoke of goal setting providing clarity about  
44 353 what mattered to them, and helping them to plan and focus their lives

47 354 *"[Goal-setting] gives he or she a much better understanding of particularly what is worrying*  
48 355 *you, what your aims are, the things that you miss being able to do and to be able to actually*  
49 356 *explain it where [GPs] have time, because very often the GPs, you know, you've only got ten*  
50 357 *minutes. But with these consultations, you're actually able to talk to a doctor, as you would*  
51 358 *indeed a friend almost" (Patient 107)*

53  
54 359 Goal-setting appeared to function as a mechanism for helping make consultations patient-centred.  
55 360 This was reflected in the unanimous support for the intervention amongst the four GPs who  
56 361 attended the GP focus group and one GP who was interviewed by phone. GPs described the goal-  
57 362 setting consultations as *more patient-centred and reflected on its 'therapeutic powers'* (GP10)  
58 363 compared to day-to-day general practice, which GPs felt could be dominated by *'box-ticking'* and  
59 364 *'target driven'* (GP018) medicine.

1  
2  
3 365 *"I felt almost as if I was trying to put on a different hat, you know, trying not to constantly*  
4 366 *interrupt them or to sort of sway them in any way, I was trying to give them the opportunity*  
5 367 *to just say what they wanted to say and set any goal that they wanted to and I, and it made*  
6 368 *me reflect on actually what I do during the day to day when I've got ten minutes with a*  
7 369 *patient and I'm very aware of the sort of pressure of, oh I've got to do a medication review*  
8 370 *and I've got to do this and oh no, their cholesterol's now 7 and oh gosh I've, have my*  
9 371 *colleagues already spoke to them about this and are they aware of X, Y and Z and actually it*  
10 372 *was quite nice in a way just take a step back and think, um I don't have to do that with this*  
11 373 *consultation, let's see what happens when the patient has more control over it"* (GP025)

12  
13  
14  
15 374 Patient participants spoke positively about the baseline researcher visit because it helped them  
16 375 understand the study and encouraged them to reflect on what was important. However, when  
17 376 discussing wider implementation across the health service, participants acknowledged that a home  
18 377 visit for each patient may be too costly and alternative provision would be acceptable to most  
19 378 people. Patients were reluctant to receive more paperwork as they felt that it was a burden for  
20 379 some people. When asked by the moderator to consider the acceptability of a group session to  
21 380 introduce people to the study and to the concept of goal-setting, all but one of the patient  
22 381 participants at the focus group felt this would be acceptable.

23  
24  
25 382 Continuity of care was a concern for patient participants. While one person was disappointed not to  
26 383 see their own GP, three were positive about consulting with a different doctor, especially if it was  
27 384 difficult to see their usual GP. However, participants spoke of wanting more follow-up and  
28 385 consistency amongst the health care team in relation to their goals in the future; some participants  
29 386 felt there was a disconnection between the activity of goal setting and their subsequent treatment  
30 387 by staff within the practice.

31  
32  
33 388 GPs stated that the experiential work, especially role play and skill spotting, was the most useful  
34 389 aspect of training. When discussing delivering training at scale, GPs felt e-training with opportunities  
35 390 to watch 'other people role-play', would fit in with their busy schedules. In addition, multiple shorter  
36 391 e-training modules, using a 'step-by-step' approach (GP014) that contributed to continuing  
37 392 professional development, would be attractive to GPs when implementing the intervention more  
38 393 widely.

## 394 Discussion

395 The process of setting goals in a GP consultation and follow-up over six months was acceptable to  
396 patients and unanimously supported by participating GPs. Recruitment and retention of practices  
397 and patients was achieved. A wide range of goals were set and, as expected with a feasibility study,  
398 there were no statistically significant differences in the main outcomes. Goal setting consultations  
399 were a similar length to control consultations. The qualitative findings were that goal-setting helped  
400 patients and GPs focus on what was important and supported GPs to deliver more patient-centred  
401 care. Patient preparedness, continuity of care and being able to deliver training at scale were  
402 important considerations for future studies of goal setting. Data on the number of health problems  
403 were not sufficiently robust for analysis because they were extracted from practice records using  
404 different processes. Asking GPs in the non-intervention group to undertake a video-recorded usual  
405 care planning consultation is likely to have altered practice compared to what would have happened  
406 within the enhanced service. An intention-to-treat analysis was undertaken to reduce the impact of  
407 protocol violations (e.g. patients not receiving the pre-specified intervention).

408 A Cochrane review, published in 2015, assessed the effects of personalised care planning (defined as  
409 goal-setting and action planning), for adults with long term health conditions compared to usual care  
410 [8]. Whilst 19 RCTs were included, all except for one focused on single conditions. The one multiple  
411 condition study included patients who had high health care use and focused on care planning, with  
412 goal-setting as part of the process, across the wider health care system to reduce unplanned  
413 admissions [34]. The authors found an increase in quality of life (measured by SF36) in the  
414 intervention compared to control, however with 50% of participants lost to follow-up and intention  
415 to treat not undertaken, there is a possibility of a lost to follow-up bias in favour of the intervention.  
416 Our study has focused on goal-setting specifically in primary care.

417 A systematic review of randomised and non-randomised studies, published in 2017, looked at  
418 collaborative goal-setting or health priority setting for elderly people with a chronic condition or  
419 multimorbidity [12]. The authors found that in four of eight intervention studies, multifactorial  
420 approaches improved goal-setting or care planning, but the review did not assess health outcomes  
421 or quality of life. The authors concluded that future research was needed to determine the “mix of  
422 essential elements within a multifactorial intervention to provide recommendations on daily  
423 practice”. Our study helps to answer this question by identifying some key requirements of goal-  
424 setting in primary care.

425 This was a feasibility study and the main implications are for the design of a subsequent definitive  
426 trial. Our objectives were to assess participant recruitment and retention, the acceptability of a goal-  
427 setting intervention to patients and GPs, the training needs of GPs, the content of control  
428 consultations, goal-setting and the feasibility of collecting relevant outcome measures.

429 We set out to recruit six practices, and seven (out of 60 invited) were willing to take part after one  
430 initial email invitation. Participant recruitment and retention was sufficient overall, but low in one  
431 practice (which recruited four out of a target of ten). Reminder letters were not sent, but these may  
432 help all practices to recruit larger numbers if required in a future study. Seven participants, five from  
433 the control and two from goal-setting, did not receive the initial consultation because they declined  
434 the consultation, withdrew consent or were not able to attend. Possibly some were disappointed to  
435 be allocated to the control group.

436 Goal-setting was acceptable to participating patients and GPs, albeit a self-selecting group who were  
437 willing to take part in research into goal-setting. Goal setting is unlikely to be relevant to everyone,

1  
2  
3 438 but the positive response of participants in this feasibility study suggests that it is likely to have  
4 439 wider acceptability in general practice. Further research is needed to understand which patients will  
5 440 benefit most from goal setting. The readiness of patients to undertake goal-setting appeared to be  
6 441 important. Although several goals were only partially attained, GPs and patients still felt them to be  
7 442 worthwhile, suggesting that the process of goal setting has benefits, apart from the achievement of  
8 443 goals.

9  
10  
11 444 Training participating GPs in goal-setting was important, and participating GPs thought that the face-  
12 445 to-face training with role play used in the feasibility study could be replaced with online e-learning to  
13 446 allow delivery at scale to a wider GP workforce. The initial researcher visit was important to  
14 447 participants and the key elements of this visit would be delivered in a future trial using video and  
15 448 leaflet-based patient information aids, again to be developed using material collected during this  
16 449 feasibility study.

17  
18  
19 450 Goal setting consultations were more focussed on what matters to the patient than the control  
20 451 consultations. Key challenges in goal setting included preparation and agreeing goals and we explore  
21 452 these further elsewhere [32]. Some patients were concerned that their goals were not considered in  
22 453 future consultations, which suggests that better communication of goals with the rest of the health  
23 454 care team will be needed. Planned follow-up of goals with the GP sooner than six months if needed  
24 455 would improve continuity of care, which is associated with lower mortality [35].

25  
26  
27 456 We collected a wide range of outcome measures in order to assess their feasibility and suitability for  
28 457 use in a future trial. Both EQ-5D-5L and the ICECAP-O should be used in a future economic  
29 458 evaluation but would not be the best primary outcome measure for a trial of goal setting. A recent  
30 459 study which aimed to improve the management of patients with multimorbidity, the 3D study, used  
31 460 the EQ5D5L as a primary outcome, but did not find any significant difference between arms [36]. It  
32 461 may be that the domains within the EQ5D5L are insensitive to changes in care for patients with  
33 462 multimorbidity and a measure of patient centred care such as PACIC is a more appropriate primary  
34 463 outcome measure as it contains a sub scale to measure goal setting. Baseline and follow-up data  
35 464 were collected during researcher visits, which could be replaced by postal questionnaires as the  
36 465 amount and complexity of data to be collected would be reduced. Postal questionnaires are widely  
37 466 used in research and could either increase or reduce the completeness of follow-up data, depending  
38 467 on the preference of individuals for a visit rather than a postal form to complete.

39  
40  
41  
42 468 Quality and Outcomes Framework data did not prove useful because of the small numbers and low  
43 469 variation. The observer OPTION scoring, initially developed within a rehabilitation context, had low  
44 470 consistency between researchers and therefore was not useful. A possible reason for this lack of  
45 471 consistency was that OPTION was developed for specific clinical decisions, and not for goal setting  
46 472 which often involved multiple complex decisions.

47  
48  
49 473 Goal-setting can be valuable for GPs and patients seeking to agree the desired outcomes of care,  
50 474 particularly for older patients with multimorbidity. This study has demonstrated that it is acceptable  
51 475 and feasible in general practice, and a full trial is now needed to assess whether goal setting  
52 476 improves important clinical outcomes for patients.

53  
54 477  
55  
56  
57  
58  
59  
60



1  
2  
3 478 Competing interests: None declared.  
4  
5 479

6  
7 480 Author contributions: NS, JF, CS and AS conceived the idea. NS, JF, EL, CS, DT, AS, AC, JM, CG, SJ, IK,  
8 481 AL, AM, TW and SW contributed to the design of the study. EL led the data collection. CS, JM and AS  
9 482 led the analysis of the qualitative data. AC undertook the statistical analysis. DT undertook the  
10 483 economic analysis. NS, JF, EL, CS, DT, AS, AC, JM, CG, SJ, IK, AL, AM, TW and SW contributed to the  
11 484 interpretation of the results. JF drafted the initial manuscript. NS, JF, EL, CS, DT, AS, AC, JM, CG, SJ,  
12 485 IK, AL, AM, TW and SW revised the manuscript and approved the final version. NS is the guarantor.  
13  
14

15 486

16  
17 487 Acknowledgements: We thank Rebecca Harmston (RH) for reviewing the video-consultations from  
18 488 the patient and public involvement perspective, Clara Yates and Gosia Majsak-Newman at the  
19 489 Norfolk and Suffolk Primary and Community Care Research Office for their support, and the patients  
20 490 and staff who took part in the study.  
21

22 491

23  
24 492 *Funding statement:* This paper presents independent research supported by the National Institute  
25 493 for Health Research (NIHR) under its Research for Patient Benefit (RfPB) Programme (Grant  
26 494 Reference Number PB-PG-0215-36079) and by the NIHR Collaboration for Leadership in Applied  
27 495 Health Research and Care East of England Programme. The views expressed are those of the  
28 496 author(s) and not necessarily those of the NHS, the NIHR or the Department of Health and Social  
29 497 Care. The funders did not have any role in the design, collection, analysis or interpretation of data or  
30 498 in writing the manuscript.  
31

32  
33 499

34  
35 500 Data sharing:

36  
37 501 Dataset of quantitative data and statistical code is available from the corresponding author.  
38  
39  
40  
41  
42  
43  
44  
45  
46  
47  
48  
49  
50  
51  
52  
53  
54  
55  
56  
57  
58  
59  
60

502 **References**

- 503 1. Steel N, Ford JA, Newton JN, et al. Changes in health in the countries of the UK and 150 English  
504 Local Authority areas 1990 to 2016: a systematic analysis for the Global Burden of Disease  
505 Study 2016. *Lancet* 2018;**392**:1647-61 doi: 10.1016/S0140-6736(18)32207-4.
- 506 2. Barnett K, Mercer SW, Norbury M, Watt G, Wyke S, Guthrie B. Epidemiology of multimorbidity and  
507 implications for health care, research, and medical education: a cross-sectional study. *Lancet*  
508 2012;**380**:37-43 doi: 10.1016/s0140-6736(12)60240-2.
- 509 3. Fortin M, Lapointe L, Hudon C, Vanasse A, Ntetu AL, Maltais D. Multimorbidity and quality of life in  
510 primary care: a systematic review. *Health and Quality of Life Outcomes* 2004;**2**:51-51 doi:  
511 10.1186/1477-7525-2-51.
- 512 4. Wilkie P. Really putting patients first: ensuring significant involvement for patients in healthcare  
513 decision making. *Br J Gen Pract* 2015;**65**:108-09 doi: 10.3399/bjgp15X683821.
- 514 5. Reuben DB, Tinetti ME. Goal-Oriented Patient Care — An Alternative Health Outcomes Paradigm.  
515 *NEMJ* 2012;**366**:777-79 doi: 10.1056/NEJMp1113631.
- 516 6. Guthrie B, Payne K, Alderson P, McMurdo MET, Mercer SW. Adapting clinical guidelines to take  
517 account of multimorbidity. *BMJ* 2012;**345** doi: 10.1136/bmj.e6341.
- 518 7. National Institute for Health and Care Excellence. Multimorbidity: clinical assessment and  
519 management NICE guideline [NG56]. London, 2016. <https://www.nice.org.uk/guidance/ng56>  
520 Accessed on 8 Nov 2018.
- 521 8. Coulter A, Entwistle VA, Eccles A, Ryan S, Shepperd S, Perera R. Personalised care planning for  
522 adults with chronic or long-term health conditions. *Cochrane Database Syst Rev*  
523 2015:Cd010523 doi: 10.1002/14651858.CD010523.pub2.
- 524 9. Reeves D, Hann M, Rick J, et al. Care plans and care planning in the management of long-term  
525 conditions in the UK: a controlled prospective cohort study. *Br J Gen Pract* 2014;**64**:e568-75  
526 doi: 10.3399/bjgp14X681385.
- 527 10. Burt J, Roland M, Paddison C, et al. Prevalence and benefits of care plans and care planning for  
528 people with long-term conditions in England. *J Health Serv Res Policy* 2012;**17** Suppl 1:64-71  
529 doi: 10.1258/jhsrp.2011.010172.
- 530 11. Elwyn G, Laitner S, Coulter A, Walker E, Watson P, Thomson R. Implementing shared decision  
531 making in the NHS. *BMJ* 2010;**341**:c5146 doi: 10.1136/bmj.c5146.
- 532 12. Vermunt NPCA, Harmsen M, Westert GP, Olde Rikkert MGM, Faber MJ. Collaborative goal setting  
533 with elderly patients with chronic disease or multimorbidity: a systematic review. *BMC*  
534 *Geriatr* 2017;**17**:167 doi: 10.1186/s12877-017-0534-0.
- 535 13. NHS England. Enhanced service specification: Avoiding unplanned admissions: proactive case  
536 finding and patient review for vulnerable people. 2014. [https://www.england.nhs.uk/wp-](https://www.england.nhs.uk/wp-content/uploads/2014/06/avoid-unpln-admss-serv-spec.pdf)  
537 [content/uploads/2014/06/avoid-unpln-admss-serv-spec.pdf](https://www.england.nhs.uk/wp-content/uploads/2014/06/avoid-unpln-admss-serv-spec.pdf) Accessed on 8 nov 2018.
- 538 14. Steel N, Clark A, Ford J, et al. Goal-setting in care planning for people with multimorbidity:  
539 feasibility study and intervention refinement Norwich: University of East Anglia, 2016.  
540 <http://www.uea.ac.uk/medicine/research/primary-care-and-epidemiology/goalplan>  
541 Accessed on 8 Nov 2018.
- 542 15. Elwyn G, Frosch D, Thomson R, et al. Shared Decision Making: A Model for Clinical Practice. *J Gen*  
543 *Intern Med* 2012;**27**:1361-67 doi: 10.1007/s11606-012-2077-6.
- 544 16. Elwyn G, Durand MA, Song J, et al. A three-talk model for shared decision making: multistage  
545 consultation process. *BMJ* 2017;**359** doi: 10.1136/bmj.j4891.
- 546 17. Silverman J, Kurtz S, Draper J. *Skills for communicating with patients*: CRC Press, 2016.
- 547 18. Herdman M, Gudex C, Lloyd A, et al. Development and preliminary testing of the new five-level  
548 version of EQ-5D (EQ-5D-5L). *Qual Life Res* 2011;**20**:1727-36 doi: 10.1007/s11136-011-9903-  
549 x.
- 550 19. Coast J, Flynn TN, Natarajan L, et al. Valuing the ICECAP capability index for older people. *Soc Sci*  
551 *Med* 2008;**67**:874-82 doi: 10.1016/j.socscimed.2008.05.015.



- 1  
2  
3 552 20. Brodaty H, Pond D, Kemp NM, et al. The GPCOG: a new screening test for dementia designed for  
4 553 general practice. *J Am Geriatr Soc* 2002;**50**:530-4.
- 5 554 21. Glasgow RE, Wagner EH, Schaefer J, Mahoney LD, Reid RJ, Greene SM. Development and  
6 555 validation of the Patient Assessment of Chronic Illness Care (PACIC). *Med Care* 2005;**43**:436-  
7 556 44.
- 8 557 22. NHS Employers. General Medical Services (GMS) contract Quality and Outcomes Framework  
9 558 (QOF). 2014. <https://www.england.nhs.uk/gp/gpfp/investment/gp-contract/> Accessed on 8  
10 559 Nov 2018.
- 11 560 23. Barr PJ, Thompson R, Walsh T, Grande SW, Ozanne EM, Elwyn G. The psychometric properties of  
12 561 CollaboRATE: a fast and frugal patient-reported measure of the shared decision-making  
13 562 process. *J Med Internet Res* 2014;**16**:e2 doi: 10.2196/jmir.3085.
- 14 563 24. Melbourne E, Sinclair K, Durand MA, Legare F, Elwyn G. Developing a dyadic OPTION scale to  
15 564 measure perceptions of shared decision making. *Patient Educ Couns* 2010;**78**:177-83 doi:  
16 565 10.1016/j.pec.2009.07.009.
- 17 566 25. Turner-Stokes L. Goal attainment scaling (GAS) in rehabilitation: a practical guide. *Clin Rehabil*  
18 567 2009;**23**:362-70 doi: 10.1177/0269215508101742.
- 19 568 26. Barr PJ, O'Malley AJ, Tsulukidze M, Gionfriddo MR, Montori V, Elwyn G. The psychometric  
20 569 properties of Observer OPTION5, an observer measure of shared decision making. *Patient*  
21 570 *Educ Couns* 2015;**98**:970-76 doi: <https://doi.org/10.1016/j.pec.2015.04.010>.
- 22 571 27. Eldridge SM, Costelloe CE, Kahan BC, Lancaster GA, Kerry SM. How big should the pilot study for  
23 572 my cluster randomised trial be? *Stat Methods Med Res* 2016;**25**:1039-56 doi:  
24 573 10.1177/0962280215588242.
- 25 574 28. Department of Health and Social Care. NHS reference costs 2015 to 2016. London, 2016.  
26 575 <https://www.gov.uk/government/publications/nhs-reference-costs-2015-to-2016> Accessed  
27 576 on 8 Nov 2018.
- 28 577 29. Curtis L. Unit Costs of Health and Social Care 2017. Canterbury: University of Kent 2017.  
29 578 <https://www.pssru.ac.uk/project-pages/unit-costs/unit-costs-2017/> Accessed on 8 Nov  
30 579 2018.
- 31 580 30. Drummond MF, Sculpher MJ, Claxton K, Stoddart GL, Torrance GW. *Methods for the economic*  
32 581 *evaluation of health care programmes*: Oxford university press, 2015.
- 33 582 31. Drew P, Chatwin J, Collins S. Conversation analysis: a method for research into interactions  
34 583 between patients and health-care professionals. *Health Expect* 2001;**4**:58-70.
- 35 584 32. Salter C, Shiner A, Lenaghan E, et al. Setting goals with patients living with multimorbidity:  
36 585 qualitative analysis of general practice consultations. *Br J Gen Pract* 2018:undergoing peer  
37 586 review.
- 38 587 33. Ritchie J, Lewis J, Nicholls CM, Ormston R. *Qualitative research practice: A guide for social science*  
39 588 *students and researchers*: Sage, 2013.
- 40 589 34. Battersby M, Harvey P, Mills PD, et al. SA HealthPlus: a controlled trial of a statewide application  
41 590 of a generic model of chronic illness care. *Milbank Q* 2007;**85**:37-67 doi: 10.1111/j.1468-  
42 591 0009.2007.00476.x.
- 43 592 35. Pereira Gray DJ, Sidaway-Lee K, White E, Thorne A, Evans PH. Continuity of care with doctors—a  
44 593 matter of life and death? A systematic review of continuity of care and mortality. *BMJ Open*  
45 594 2018;**8** doi: 10.1136/bmjopen-2017-021161.
- 46 595 36. Salisbury C, Man MS, Bower P, et al. Management of multimorbidity using a patient-centred care  
47 596 model: a pragmatic cluster-randomised trial of the 3D approach. *Lancet* 2018;**392**:41-50 doi:  
48 597 10.1016/s0140-6736(18)31308-4.
- 49 598 37. Office for National Statistics. 2011 Rural/urban Classification. London, 2011.  
50 599 [http://www.ons.gov.uk/ons/guide-method/geography/products/area-classifications/2011-](http://www.ons.gov.uk/ons/guide-method/geography/products/area-classifications/2011-rural-urban/index.html)  
51 600 [rural-urban/index.html](http://www.ons.gov.uk/ons/guide-method/geography/products/area-classifications/2011-rural-urban/index.html) Accessed on 8 Nov 2018.

- 1
- 2
- 3 602 Figure legends
- 4
- 5 603 Figure 1: Consort flow diagram
- 6
- 7
- 8
- 9
- 10
- 11
- 12
- 13
- 14
- 15
- 16
- 17
- 18
- 19
- 20
- 21
- 22
- 23
- 24
- 25
- 26
- 27
- 28
- 29
- 30
- 31
- 32
- 33
- 34
- 35
- 36
- 37
- 38
- 39
- 40
- 41
- 42
- 43
- 44
- 45
- 46
- 47
- 48
- 49
- 50
- 51
- 52
- 53
- 54
- 55
- 56
- 57
- 58
- 59
- 60

For peer review only

Table 1: Baseline characteristics of participating practices and patients, by practice

|                                      | Goal-setting                                     |                                                                  |                                        | Control                                                                             |                                                    |                                                    |
|--------------------------------------|--------------------------------------------------|------------------------------------------------------------------|----------------------------------------|-------------------------------------------------------------------------------------|----------------------------------------------------|----------------------------------------------------|
|                                      | Practice 1                                       | Practice 2                                                       | Practice 3                             | Practice 4                                                                          | Practice 5                                         | Practice 6                                         |
| <b>Practice characteristics</b>      |                                                  |                                                                  |                                        |                                                                                     |                                                    |                                                    |
| Practice rurality*                   | Village                                          | Town and fringe                                                  | Town and fringe                        | Urban >10K                                                                          | Urban >10K                                         | Urban >10K                                         |
| Patient population                   | 5000 to 9,900                                    | 10,000 to 14,900                                                 | 5000 to 9,900                          | >14,900                                                                             | 10,000 to 14,900                                   | 10,000 to 14,900                                   |
| IMD practice decile                  | 7                                                | 5                                                                | 7                                      | 9                                                                                   | 5                                                  | 5                                                  |
| Characteristics of participating GPs | n=2<br>both male, partners and working part-time | n=2<br>one male, one female, both partners and working full-time | n=1<br>male, partner working part-time | n=2<br>One male, one female, both partners, one working full-time and one part-time | n=2<br>both female, partners and working part-time | n=2<br>both female, partners and working part-time |
| Years qualified of participating GPs | GP014 = >20 yrs;<br>GP018 = 10 to 20 yrs         | GP025 = <10 yrs;<br>GP026 = 10 to 20 yrs                         | GP038 = 10 to 20 yrs                   | GP046 = >20 yrs;<br>GP047 = >20 yrs                                                 | GP053 = >20 yrs;<br>GP055 = >20 yrs                | GP061 = 10 to 20 yrs;<br>GP067 = 10 to 20 yrs      |
| <b>Practice recruitment</b>          |                                                  |                                                                  |                                        |                                                                                     |                                                    |                                                    |
| Patients assessed for eligibility, n | 9067                                             | 14845                                                            | 6791                                   | 18540                                                                               | 10381                                              | 13439                                              |
| Patients invited, n (% assessed)     | 77 (0.8)                                         | 108 (0.7)                                                        | 47 (0.7)                               | 108 (0.6)                                                                           | 124 (1.2)                                          | 86 (0.6)                                           |
| Recruited, n (% invited)*            | 11 (14.3)                                        | 9 (8.3)                                                          | 4 (8.5)                                | 8 (7.4)                                                                             | 10 (11.6)                                          | 10 (11.6)                                          |

\*ONS indicator 2011 [37], \*\* = based on Barnett list [2] IMD = Index of Multiple Deprivation (1= most deprived and 10 least deprived), partner = GP with responsibility for the practice, n= number, SD = standard deviation, IQR = Interquartile Range, n= number, \*=does not include those on the reserve list (see Figure 1)

Table 2: Baseline characteristics of patient participants

| Variable                          |                                               | Control           | Goal-setting      |
|-----------------------------------|-----------------------------------------------|-------------------|-------------------|
| Number                            |                                               | 28                | 24                |
| Female n (%)                      |                                               | 11 (39%)          | 13 (54%)          |
| Age mean (SD)                     |                                               | 77.18 (9.42)      | 80.42 (8.72)      |
| GPCOG category n (%)              | Impairment and further investigations implied | 1 (4%)            | 0 (0%)            |
|                                   | Informant interview required                  | 17 (61%)          | 19 (79%)          |
|                                   | No cognitive impairment                       | 10 (36%)          | 5 (21%)           |
| Number of diagnoses* median (IQR) |                                               | 4.00 (3.00, 5.00) | 5.00 (3.00, 6.00) |
| IMD national quartile n (%)       | 1                                             | 5 (18%)           | 0 (0%)            |
|                                   | 2                                             | 9 (32%)           | 14 (58%)          |
|                                   | 3                                             | 3 (11%)           | 10 (42%)          |
|                                   | 4                                             | 11 (39%)          | 0 (0%)            |
| Marital status n (%)              | Divorced                                      | 0 (0%)            | 2 (8%)            |
|                                   | Living with partner                           | 0 (0%)            | 2 (8%)            |
|                                   | Married                                       | 12 (43%)          | 10 (42%)          |
|                                   | Single                                        | 2 (7%)            | 4 (17%)           |
|                                   | Widowed                                       | 14 (50%)          | 6 (25%)           |

N= number, SD = standard deviation, IQR = Interquartile Range, GPCOG = General Practitioner assessment of Cognition, PACIC = Patients Assessment Chronic Illness Care, EQ-5Q-5L = 5 level EQ-5D, ICECAP-O = ICEpop CAPability measure for Older people, \* = based on Barnett list [2], IMD = Index of Multiple Deprivation

Table 3: Characteristics of initial consultations

|                                                   | Intervention group     |                       |                       |                                | Control group         |                       |                       |                           | Mean difference between intervention and control (95% CI) |
|---------------------------------------------------|------------------------|-----------------------|-----------------------|--------------------------------|-----------------------|-----------------------|-----------------------|---------------------------|-----------------------------------------------------------|
|                                                   | Practice 1<br>(n = 10) | Practice 2<br>(n = 8) | Practice 3<br>(n = 4) | Intervention total<br>(n = 22) | Practice 4<br>(n = 7) | Practice 5<br>(n = 9) | Practice 6<br>(n = 7) | Control total<br>(n = 23) |                                                           |
| Duration of initial consultation (mins) mean (SD) | 24.1<br>(4.0)          | 23.3<br>(4.4)         | 19.9<br>(6.2)         | 23.0 (4.6)                     | 14.3<br>(4.8)         | 25.2<br>(5.7)         | 16.3<br>(4.1)         | 19.2 (6.9)                | 3.88<br>(-3.25,11.01)                                     |
| Dyadic OPTION scores mean (SD)                    | 65.3<br>(9.0)          | 63.2<br>(6.4)         | 62.5<br>(3.6)         | 64.0 (7.2)                     | 63.5<br>(13.0)        | 62.7<br>(4.0)         | 42.1<br>(20.4)        | 56.6<br>(16.2)            | 7.57<br>(-6.37,21.50)                                     |
| CollaboRATE scores mean (SD)                      | 7.8 (1.0)              | 8.5 (0.9)             | 8.8 (0.2)             | 8.2 (1.0)                      | 7.0 (2.6)             | 8.6 (0.7)             | 8.7 (0.6)             | 8.1 (1.8)                 | 0.20<br>(-1.06,1.47)                                      |
| GP:patient word count ratio mean (SD)             | 1.23<br>(0.40)         | 1.41<br>(0.78)        | 1.50<br>(1.05)        | 1.35 (0.67)                    | 1.13<br>(0.45)        | 1.92<br>(0.75)        | 1.39<br>(0.52)        | 1.52<br>(0.67)            | -0.14<br>(-0.65,0.37)                                     |

SD= standard deviation, n= number, 95%CI = 95% confidence interval

Table 4: Patient participants, goals set and attainment scores by practice

|                                                                          |                              | Practice 1 | Practice 2 | Practice 3 | Overall   |
|--------------------------------------------------------------------------|------------------------------|------------|------------|------------|-----------|
| Number of patients                                                       |                              | 10         | 8          | 4          | 22        |
| Number of patients setting 1, 2 or 3 goals                               | 1 goal                       | 0          | 2          | 1          | 3         |
|                                                                          | 2 goals                      | 3          | 4          | 3          | 10        |
|                                                                          | 3 goals                      | 7          | 2          | 0          | 9         |
| Number of goals set                                                      |                              | 27         | 16         | 7          | 50        |
| Number of goals with data available for attainment scoring               |                              | 21         | 15         | 6          | 42        |
| Number of goals in each attainment score category (category score) n (%) | worse than expected (-1)     | 1 (4.8)    | 2 (13.3)   | 1 (16.7)   | 4 (9.5)   |
|                                                                          | no change (0)                | 4 (19.0)   | 0 (0.0)    | 2 (33.3)   | 6 (14.3)  |
|                                                                          | partially attained (1)       | 9 (42.9)   | 5 (33.3)   | 1 (16.7)   | 15 (35.7) |
|                                                                          | as expected (2)              | 2 (9.5)    | 3 (20.0)   | 1 (16.7)   | 6 (14.3)  |
|                                                                          | a little more (3)            | 2 (9.5)    | 4 (26.7)   | 0 (0.0)    | 6 (14.3)  |
|                                                                          | a lot more than expected (4) | 3 (14.3)   | 1 (6.7)    | 1 (16.7)   | 5 (11.9)  |
| Mean goal attainment score per patient (range -1 to 4)                   |                              | 1.43       | 1.67       | 1.0        | 1.45      |

Table 5: Categories of goals set

| Goal categories                                      | Number of goals |
|------------------------------------------------------|-----------------|
| Management of chronic condition (non-medication)     | 9               |
| Walking-related                                      | 8               |
| Maintain interests                                   | 5               |
| Management of chronic condition (medication-related) | 5               |
| Gain weight                                          | 4               |
| Social participation                                 | 3               |
| Healthy living                                       | 3               |
| Balance/mobility                                     | 3               |
| Gardening-related                                    | 3               |
| Manual dexterity                                     | 3               |
| Mental health                                        | 2               |
| End of life management                               | 1               |
| Cooking/food preparation                             | 1               |
| Grand Total                                          | 50              |

Table 6: Change in outcome measures between groups at six months

| Variable             | Control |                     |                      | Intervention          |    |                     |                      | Mean difference-in-difference between goal-setting and control (95% CI) | Intraclass correlation coefficient (95% CI) |                       |
|----------------------|---------|---------------------|----------------------|-----------------------|----|---------------------|----------------------|-------------------------------------------------------------------------|---------------------------------------------|-----------------------|
|                      | n       | Baseline, mean (SD) | Follow-up, mean (SD) | Difference, mean (SD) | n  | Baseline, mean (SD) | Follow-up, mean (SD) |                                                                         |                                             | Difference, mean (SD) |
| Number of medication | 28      | 12.5 (8.19)         | 12.79 (7.25)         | 0.29 (2.65)           | 23 | 13.61 (4.56)        | 14.65 (4.44)         | 1.04 (3.21)                                                             | 0.76 (-0.85,2.37)                           | 0.00*                 |
| GPCOG                | 23      | 7.35 (1.70)         | 6.78 (2.19)          | -0.57 (2.02)          | 19 | 7.58 (1.30)         | 7.00 (2.26)          | -0.58 (2.29)                                                            | 0.09 (-1.65,1.84)                           | 0.08 (0.00,0.77)      |
| PACIC                | 23      | 1.45 (0.30)         | 1.85 (0.77)          | 0.40 (0.69)           | 18 | 1.94 (0.76)         | 2.25 (0.70)          | 0.31 (0.98)                                                             | -0.09 (-0.60,0.42)                          | 0.00*                 |
| EQ-5D-5L             | 23      | 0.54 (0.34)         | 0.52 (0.35)          | -0.02 (0.19)          | 18 | 0.56 (0.25)         | 0.55 (0.28)          | -0.01 (0.15)                                                            | 0.02 (-0.11,0.13)                           | 0.05 (0.00,0.94)      |
| ICECAP-O             | 22      | 0.72 (0.26)         | 0.78 (0.20)          | 0.06 (0.14)           | 17 | 0.78 (0.12)         | 0.77 (0.13)          | -0.02 (0.06)                                                            | -0.08 (-0.15,-0.00)                         | 0.00*                 |

SD = standard deviation, GPCOG = General Practitioner assessment of Cognition, PACIC = Patients Assessment Chronic Illness Care, EQ-5Q-5L = 5 level EQ-5D, ICECAP-O = ICEpop CAPability measure for Older people, 95%CI = 95% confidence interval

\*The confidence interval was not reported in cases when the ICC is zero as the standard error is undefined in these cases



Table 7: Costs associated with health care use in

| Resource use             | 6-months prior to recruitment |                               |                     |                        |                                    |                     | Recruitment to 6-month follow-up |                               |                     |                     |                                    |                     |
|--------------------------|-------------------------------|-------------------------------|---------------------|------------------------|------------------------------------|---------------------|----------------------------------|-------------------------------|---------------------|---------------------|------------------------------------|---------------------|
|                          | Total contacts<br>n           | Control<br>Total<br>cost<br>£ | Mean cost<br>£ (SD) | Total<br>contacts<br>n | Goal-setting<br>Total<br>cost<br>£ | Mean cost<br>£ (SD) | Total contacts<br>n              | Control<br>Total<br>cost<br>£ | Mean cost<br>£ (SD) | Total contacts<br>n | Goal-setting<br>Total<br>cost<br>£ | Mean cost<br>£ (SD) |
| Community based services |                               |                               |                     |                        |                                    |                     |                                  |                               |                     |                     |                                    |                     |
| GP                       | 157                           | 4,636                         | 166 (164)           | 89                     | 2,464                              | 107 (115)           | 177                              | 5,150                         | 184 (150)           | 124                 | 4,002                              | 174 (145)           |
| Other practice based     | 97                            | 922                           | 33 (42)             | 108                    | 1,080                              | 47 (30)             | 152                              | 1,823                         | 65 (58)             | 149                 | 1,529                              | 66 (53)             |
| District Nurse           | 148                           | 3,582                         | 128 (546)           | 198                    | 6,450                              | 280 (1297)          | 100                              | 2,879                         | 103 (321)           | 241                 | 7,450                              | 324 (1384)          |
| Other                    | 72                            | 1,434                         | 51 (132)            | 72                     | 2,601                              | 113 (193)           | 189                              | 7,652                         | 273 (355)           | 97                  | 5,510                              | 240 (224)           |
| All community based      | 474                           | 10,575                        | 378 (778)           | 467                    | 12,594                             | 548 (1520)          | 618                              | 15,681                        | 560 (719)           | 611                 | 16,962                             | 737 (1537)          |
| Inpatient                | 4                             | 11,291                        | 403 (1113)          | 16                     | 28,054                             | 1220 (2584)         | 12                               | 35,055                        | 1252 (2203)         | 13                  | 39,889                             | 1734 (4815)         |
| Outpatient               | 45                            | 4,848                         | 173 (208)           | 51                     | 7,381                              | 321 (397)           | 41                               | 4,424                         | 158 (202)           | 52                  | 6,295                              | 274 (329)           |
| A&E                      | 1                             | 138                           | 5 (26)              | 6                      | 826                                | 36 (74)             | 15                               | 2,066                         | 74 (109)            | 16                  | 2,204                              | 96 (128)            |
| Total for all costs      |                               | 26,853                        | 959 (1776)          |                        | 48,856                             | 2124 (4031)         |                                  | 57,226                        | 2044 (2665)         |                     | 65,349                             | 2841 (4968)         |

SD = standard deviation, A&E = Accident and Emergency

1  
2  
3  
4  
5  
6  
7  
8  
9  
10  
11  
12  
13  
14  
15  
16  
17  
18  
19  
20  
21  
22  
23  
24  
25  
26  
27  
28  
29  
30  
31  
32  
33  
34  
35  
36  
37  
38  
39  
40  
41  
42  
43  
44  
45  
46  
47  
48  
49  
50  
51  
52  
53  
54  
55  
56  
57  
58  
59  
60

For peer review only

Figure 1: Consort flow diagram

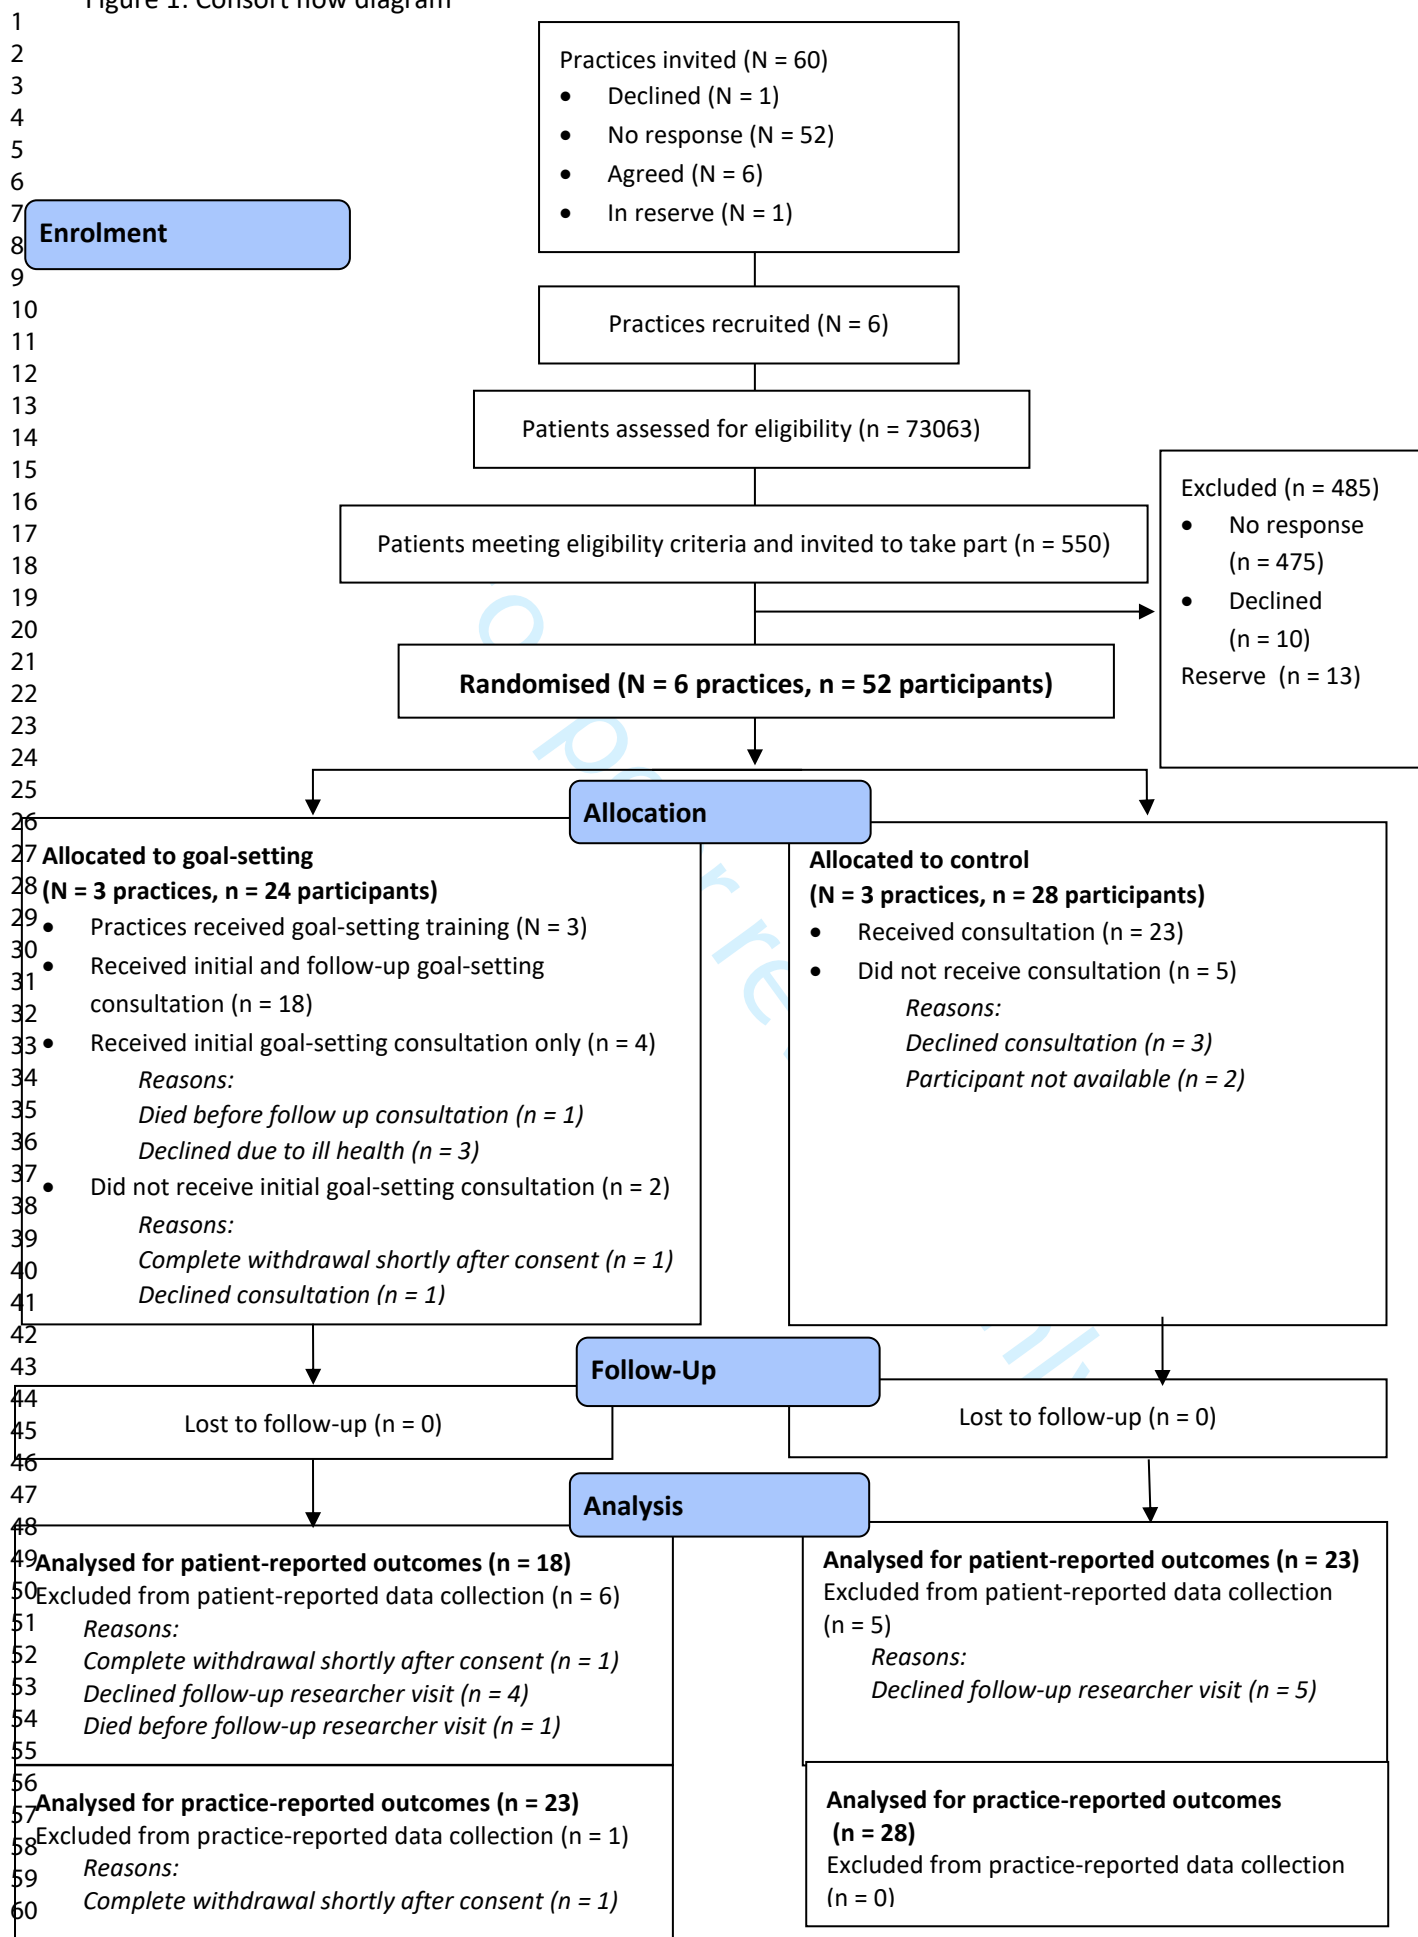

(N= number of practice, n= number of individuals)

Supplementary Table 1: Characteristics of those who participated compared with those who did not

|                      | Participation | Non-participation |
|----------------------|---------------|-------------------|
| Number               | 52            | 498               |
| Age mean (SD)        | 78.5 (9.0)    | 79.6 (12.2)       |
| Female %             | 46.2%         | 53.8%             |
| IMD decile mean (SD) | 5.8 (2.3)     | 5.3 (2.2)         |

SD = standard deviation, IMD = Index of Multiple Deprivation

For peer review only

Supplementary Table 2: Quality and Outcomes Framework data

|                                                   |                                                   | Goal-setting | Control      |
|---------------------------------------------------|---------------------------------------------------|--------------|--------------|
| BMI                                               | No of participants                                | 2            | 3            |
|                                                   | Baseline mean (SD)                                | 28.4 (1.9)   | 37.8 (8.0)   |
|                                                   | Follow-up (mean, SD)                              | 28.5 (3.6)   | 37.0 (9.5)   |
|                                                   | Diff (mean, SD)                                   | 0.1 (1.7)    | -0.8 (2.7)   |
| BP, mmHg                                          | No of participants                                | 5            | 5            |
|                                                   | Baseline systolic (mean, SD)                      | 133.5 (6.5)  | 127.5 (19.0) |
|                                                   | Baseline diastolic (mean, SD)                     | 70.7 (4.4)   | 69.2 (5.5)   |
|                                                   | Follow-up systolic (mean, SD)                     | 144.7 (7.0)  | 124.4 (6.2)  |
|                                                   | Follow-up diastolic (mean, SD)                    | 80.6 (4.7)   | 67.1 (5.6)   |
|                                                   | Mean diff systolic (mean, SD)                     | 11.2 (12.6)  | -3.1 (14.4)  |
|                                                   | Mean diff diastolic (mean, SD)                    | 9.9 (3.1)    | -2.1 (8.7)   |
|                                                   | Baseline Qof target met (150/90)                  | 5/5          | 5/5          |
|                                                   | Follow-up Qof target met (150/90)                 | 4/5          | 5/5          |
| eGFR, mL/min/1.73m <sup>2</sup>                   | No of participants                                | 4            | 6            |
|                                                   | Baseline (mean, SD)                               | 54 (14)      | 57 (24)      |
|                                                   | Follow-up (mean, SD)                              | 56 (17)      | 59 (25)      |
|                                                   | Mean diff (mean, SD)                              | 2 (5)        | 2 (3)        |
| HB1Ac, mmol/mol                                   | No of participants                                | 1            | 3            |
|                                                   | Baseline (mean, SD)                               | 80 (NA)      | 39 (3)       |
|                                                   | Follow-up (mean, SD)                              | 87 (NA)      | 43 (6)       |
|                                                   | Mean diff (mean, SD)                              | 7 (NA)       | 4 (3)        |
|                                                   | Baseline Qof target met - Diabetes and HB1Ac <59  | 0/1          | 1/1          |
|                                                   | Baseline Qof target met - Diabetes and HB1Ac <64  | 0/1          | 1/1          |
|                                                   | Baseline Qof target met - Diabetes and HB1Ac <75  | 0/1          | 1/1          |
|                                                   | Follow-up Qof target met - Diabetes and HB1Ac <59 | 0/1          | 1/1          |
|                                                   | Follow-up Qof target met - Diabetes and HB1Ac <64 | 0/1          | 1/1          |
| Follow-up Qof target met - Diabetes and HB1Ac <75 | 0/1                                               | 1/1          |              |
| Total cholesterol, mg/dL                          | No of participants                                | 2            | 1            |
|                                                   | Baseline (mean, SD)                               | 2.8 (0.7)    | 4.2 (NA)     |
|                                                   | Follow-up (mean, SD)                              | 3.9 (1.1)    | 4.9 (NA)     |
|                                                   | Mean diff (mean, SD)                              | 1.1 (0.5)    | 0.7 (NA)     |
| HDL cholesterol, mg/dL                            | No of participants                                | 2            | 0            |
|                                                   | Baseline (mean, SD)                               | 0.84 (0.19)  | NA           |
|                                                   | Follow-up (mean, SD)                              | 1.01 (0.4)   | NA           |
|                                                   | Mean diff (mean, SD)                              | 0.17 (0.15)  | NA           |

BMI = body mass index, SD= standard deviation, BP = blood pressure, eGFR = estimated glomerular filtration rate, HB1Ac = glycated haemoglobin, Qof = Quality and Outcomes Framework, HDL = High Density Lipoproteins, NA= not applicable

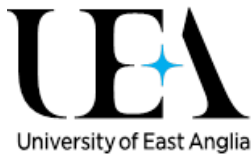

# BMJ Open GoalPlan Study: Goal-setting form

for completion before care plan appointment

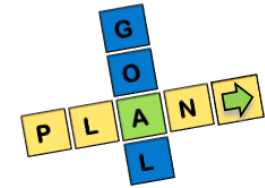

## Part 1) What are your goals? What is important to you?

Write down what you would really like to do or achieve over the next 6 months, even if you think it may not be related to your health. Think about things that you would like to do in your personal, home, work, and social life—things that you **need** to do, **want** to do and / or **enjoy doing**. Then list them in order of priority— starting with 1 for the goal that matters to you most and that you would like to focus on at the moment. To help you, we have put a completed example overleaf.

**What do you really want to achieve over the next 6 months? (your goals)**

Empty box for writing goals

1  
2  
3  
4  
5  
6  
7  
8  
9  
10  
11  
12  
13  
14  
15  
16  
17  
18  
19  
20  
21  
22  
23  
24  
25  
26  
27  
28  
29  
30  
31  
32  
33  
34  
35  
36  
37  
38  
39  
40  
41  
42  
43  
44  
45  
46  
47

Example

- *I want to be able to do more in the garden as it relaxes me*
- *I want to lose weight so I can walk more confidently at my daughter's wedding and fit into my favourite outfit again*
- *I want to be able to get more exercise as it used to help me sleep well*
- *I want to get back to driving so I can visit my friend at his house every week*
- *I want to be able to go out with friends once a week again for lunch*

**Part 2) Why are these goals important to you?**

We now ask you to focus on your goals from Part 1, and to think about why they are important to you. Below is an example of how to find out if a goal you have come up with is important for its own sake, or if it is important because it will help you achieve something else. We ask you to do this exercise with up to three of your goals overleaf.

**Part 3) What are the first steps you would like to take towards achieving this goal or goals?**

Having identified your most important goals, the final step on this form is to start thing about steps you would like to take to achieve those goals. This is also included in the example below. Please do the same for your goals overleaf.

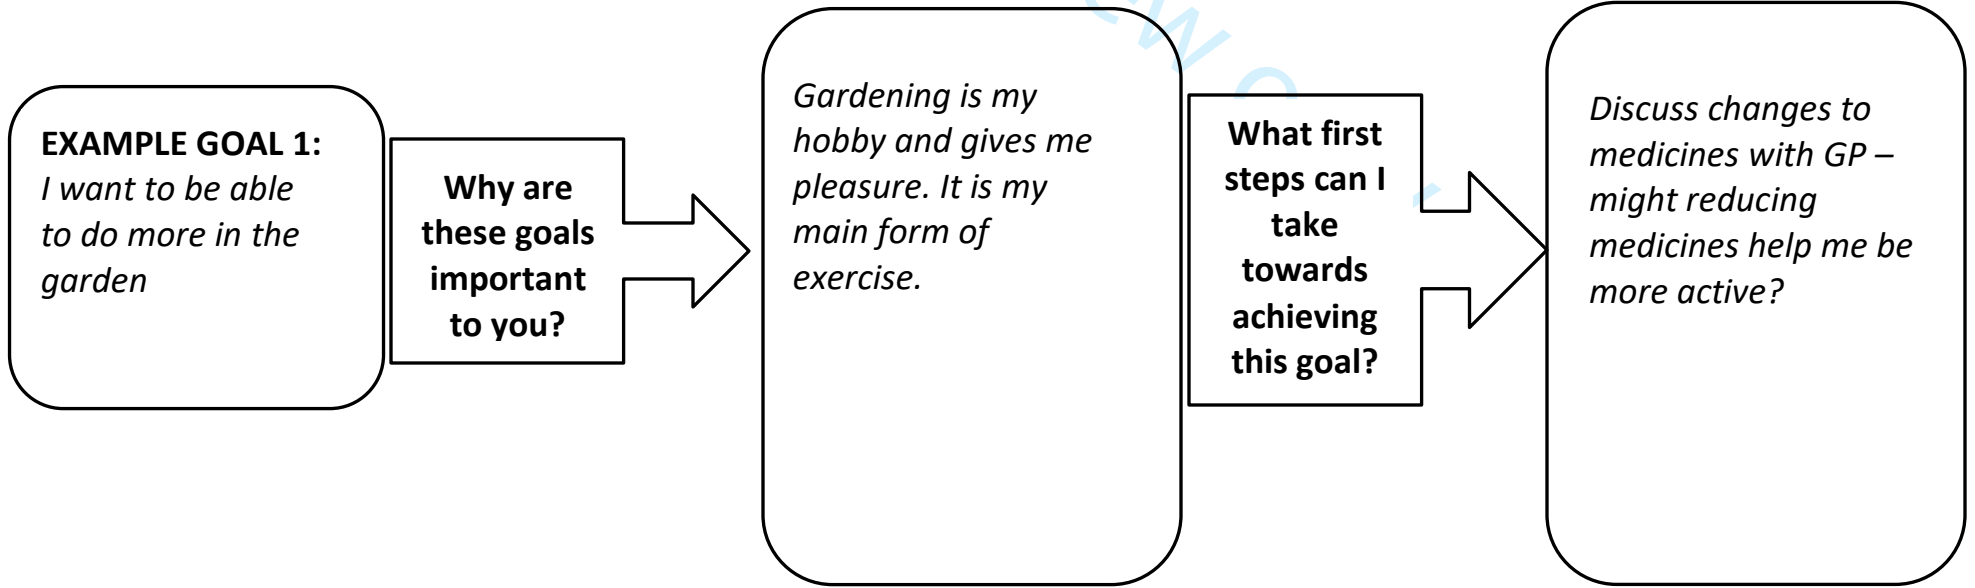

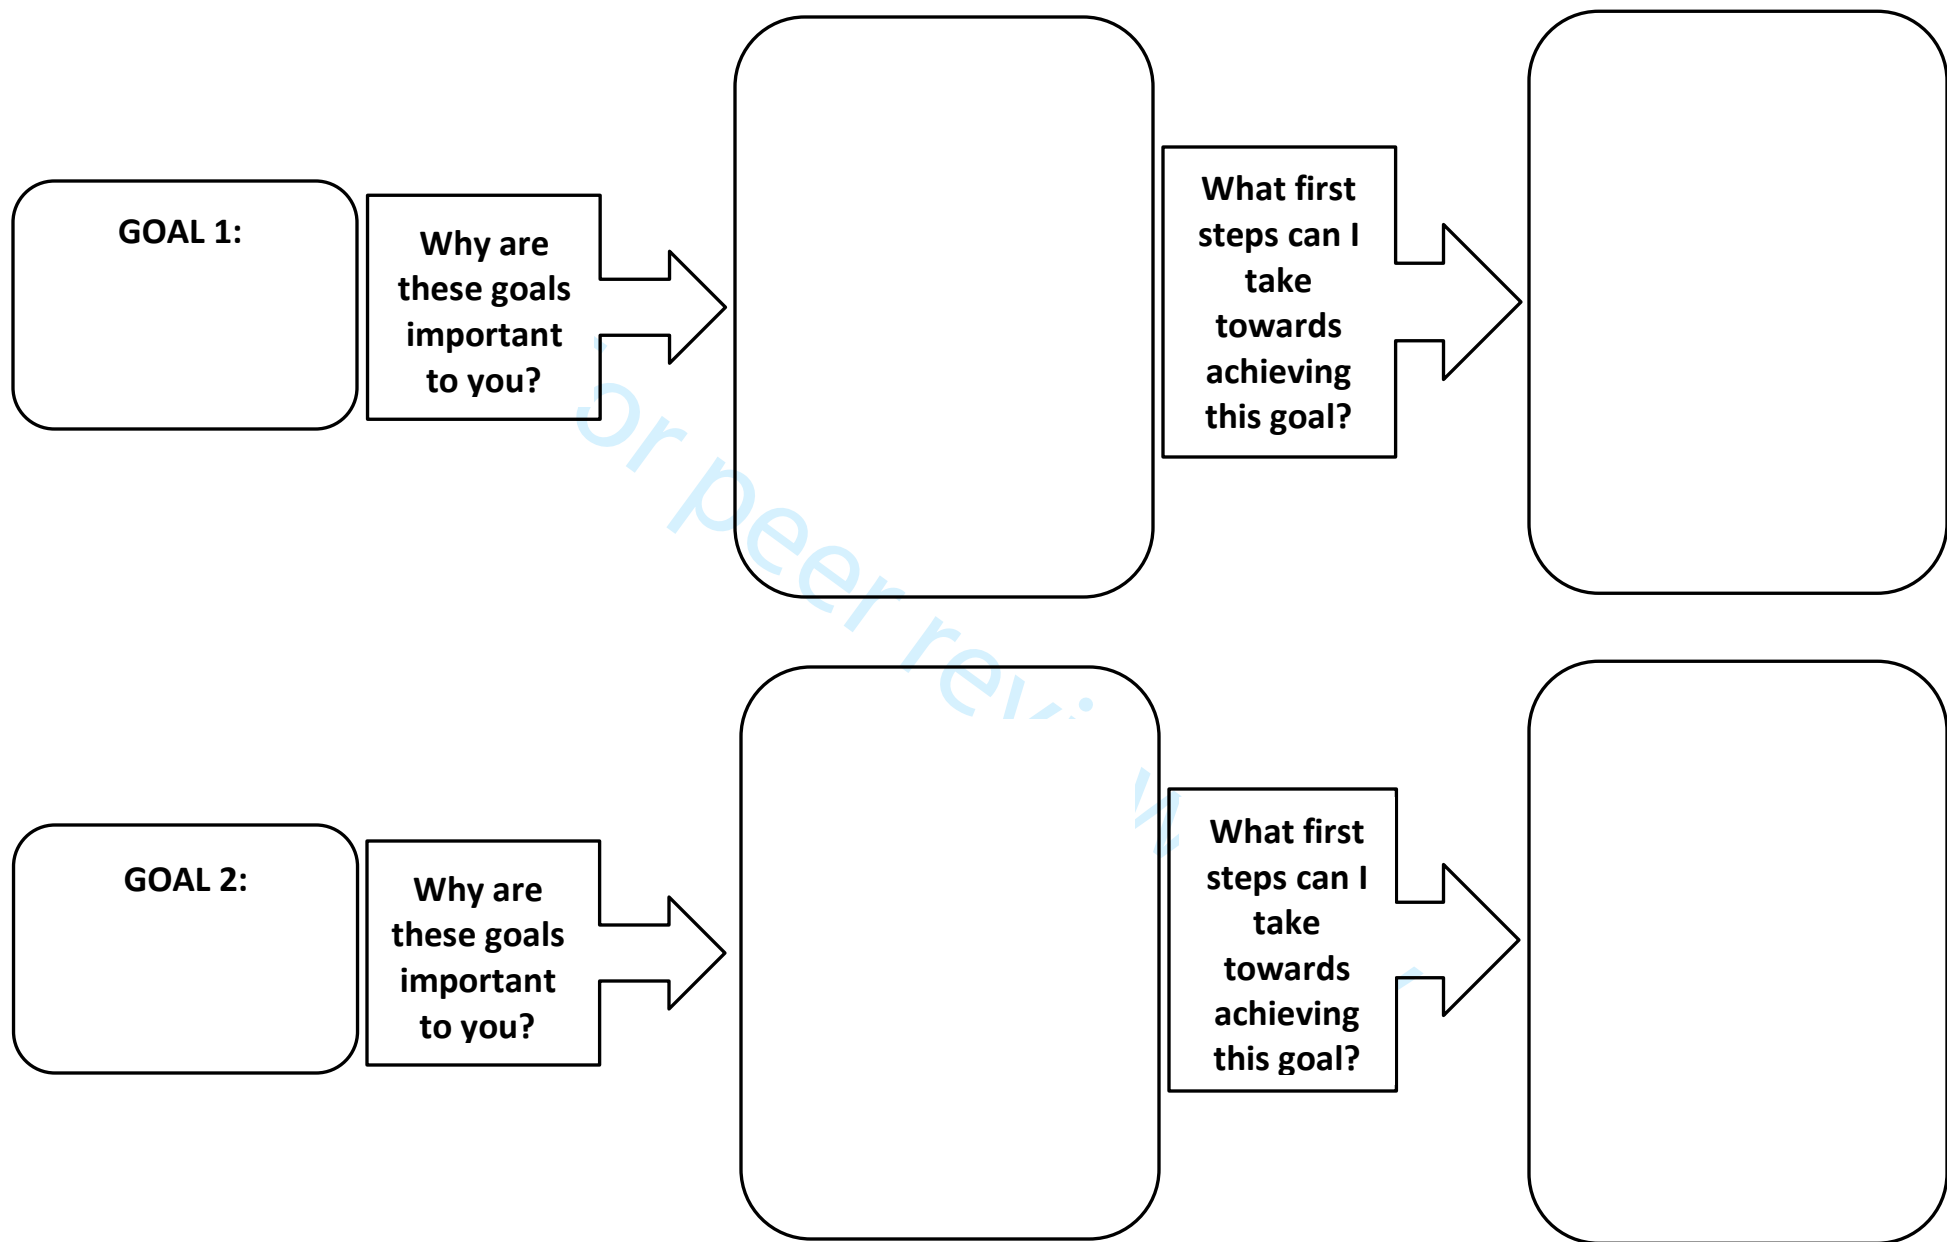



1  
2  
3  
4  
5  
6  
7  
8  
9  
10  
11  
12  
13  
14  
15  
16  
17  
18  
19  
20  
21  
22  
23  
24  
25  
26  
27  
28  
29  
30  
31  
32  
33  
34  
35  
36  
37  
38  
39  
40  
41  
42  
43  
44  
45  
46  
47

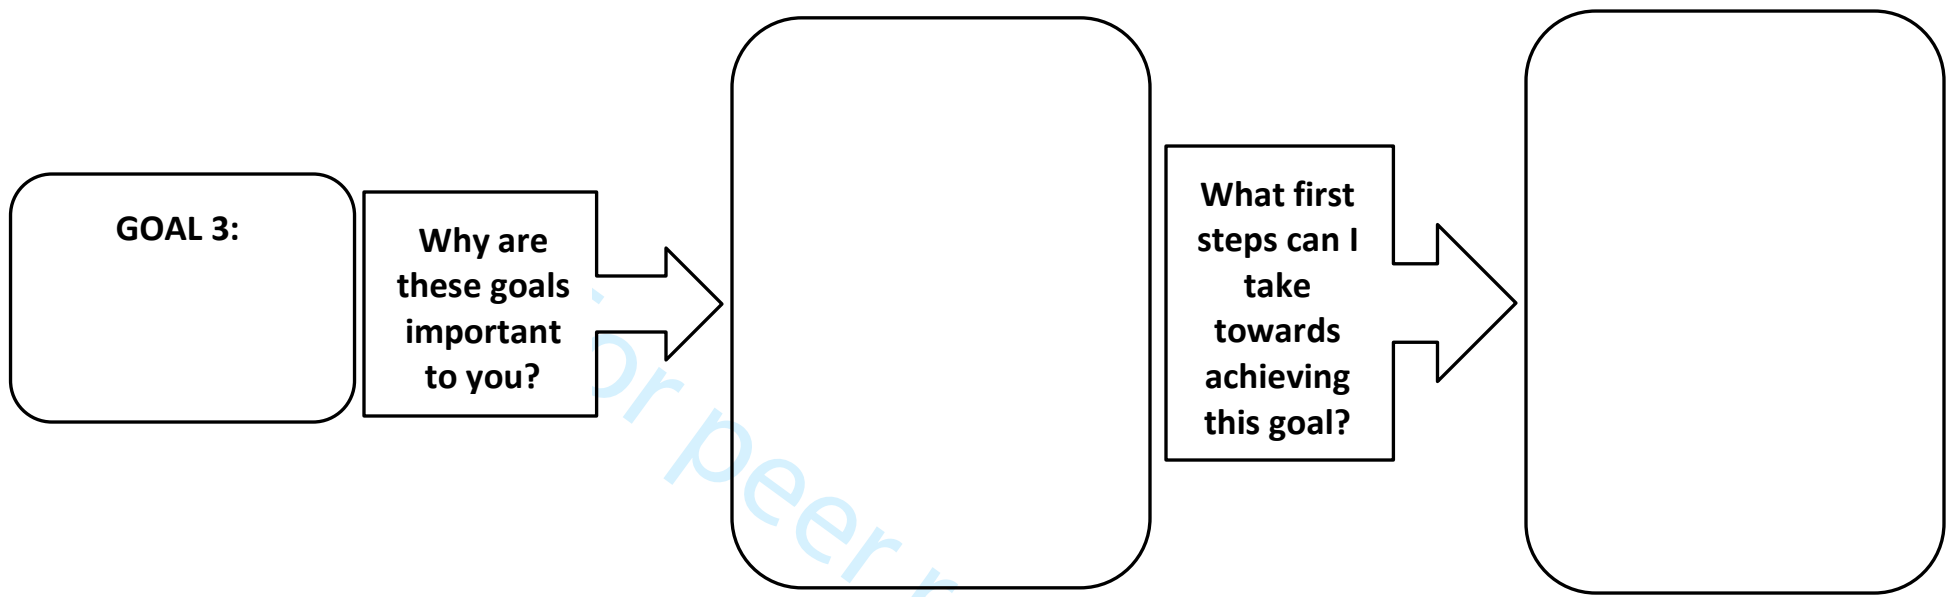

**Thank you for completing this goal-setting form. Please take it with you to your care plan appointment. Your GP will discuss it with you and together you will make specific plans to achieve your goals.**

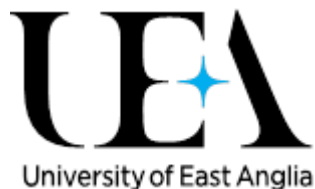

# GoalPlan Study

## GAS-Light verbal scoring system

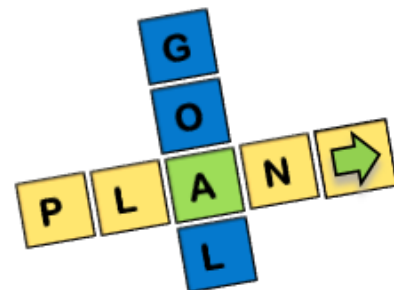

1  
2  
3  
4  
5  
6  
7  
8  
9  
10  
11  
12  
13  
14  
15  
16  
17  
18  
19  
20  
21  
22  
23  
24  
25  
26  
27  
28  
29  
30  
31  
32  
33  
34  
35  
36  
37  
38  
39  
40  
41  
42  
43  
44  
45  
46  
47  
48  
49  
50  
51  
52  
53  
54  
55  
56  
57  
58  
59  
60

| Goal 1:                                                 |                                         |                                            | Tick                     |
|---------------------------------------------------------|-----------------------------------------|--------------------------------------------|--------------------------|
| <b>At Baseline</b>                                      | With respect to this goal do they have? | Some attainment                            | <input type="checkbox"/> |
|                                                         |                                         | No attainment<br>(as bad as they could be) | <input type="checkbox"/> |
| <b>At 6 month review:</b><br><br>Was the goal attained? | <b>Yes</b>                              | A lot more                                 | <input type="checkbox"/> |
|                                                         |                                         | A little more                              | <input type="checkbox"/> |
|                                                         |                                         | As expected                                | <input type="checkbox"/> |
|                                                         | <b>No</b>                               | Partially attained                         | <input type="checkbox"/> |
|                                                         |                                         | No change                                  | <input type="checkbox"/> |
|                                                         |                                         | Got worse                                  | <input type="checkbox"/> |

PTO for further goals

|                                                         |                                                                                               |                                            |                          |
|---------------------------------------------------------|-----------------------------------------------------------------------------------------------|--------------------------------------------|--------------------------|
| <b>Goal 2:</b>                                          |                                                                                               |                                            | <b>Tick</b>              |
| <b>At Baseline</b>                                      | With respect to this goal do they have?                                                       | Some attainment                            | <input type="checkbox"/> |
|                                                         |                                                                                               | No attainment<br>(as bad as they could be) | <input type="checkbox"/> |
| <b>At 6 month review:</b><br><br>Was the goal attained? | <b>Yes</b> 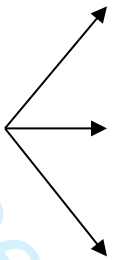  | A lot more                                 | <input type="checkbox"/> |
|                                                         |                                                                                               | A little more                              | <input type="checkbox"/> |
|                                                         |                                                                                               | As expected                                | <input type="checkbox"/> |
|                                                         | <b>No</b>  | Partially attained                         | <input type="checkbox"/> |
|                                                         |                                                                                               | No change                                  | <input type="checkbox"/> |
|                                                         |                                                                                               | Got worse                                  | <input type="checkbox"/> |

PTO for further goals

|                                                         |                                                                                               |                                            |                          |
|---------------------------------------------------------|-----------------------------------------------------------------------------------------------|--------------------------------------------|--------------------------|
| <b>Goal 3:</b>                                          |                                                                                               |                                            | <b>Tick</b>              |
| <b>At Baseline</b>                                      | With respect to this goal do they have?                                                       | Some attainment                            | <input type="checkbox"/> |
|                                                         |                                                                                               | No attainment<br>(as bad as they could be) | <input type="checkbox"/> |
| <b>At 6 month review:</b><br><br>Was the goal attained? | <b>Yes</b> 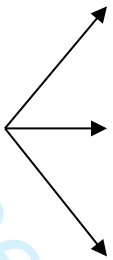  | A lot more                                 | <input type="checkbox"/> |
|                                                         |                                                                                               | A little more                              | <input type="checkbox"/> |
|                                                         |                                                                                               | As expected                                | <input type="checkbox"/> |
|                                                         | <b>No</b>  | Partially attained                         | <input type="checkbox"/> |
|                                                         |                                                                                               | No change                                  | <input type="checkbox"/> |
|                                                         |                                                                                               | Got worse                                  | <input type="checkbox"/> |

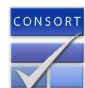

## CONSORT 2010 checklist of information to include when reporting a pilot or feasibility trial\*

| Section/Topic                    | Item No | Checklist item                                                                                                                                                                              | Reported on page No |
|----------------------------------|---------|---------------------------------------------------------------------------------------------------------------------------------------------------------------------------------------------|---------------------|
| <b>Title and abstract</b>        |         |                                                                                                                                                                                             |                     |
|                                  | 1a      | Identification as a pilot or feasibility randomised trial in the title                                                                                                                      | 1                   |
|                                  | 1b      | Structured summary of pilot trial design, methods, results, and conclusions (for specific guidance see CONSORT abstract extension for pilot trials)                                         | 2                   |
| <b>Introduction</b>              |         |                                                                                                                                                                                             |                     |
| Background and objectives        | 2a      | Scientific background and explanation of rationale for future definitive trial, and reasons for randomised pilot trial                                                                      | 4                   |
|                                  | 2b      | Specific objectives or research questions for pilot trial                                                                                                                                   | 4                   |
| <b>Methods</b>                   |         |                                                                                                                                                                                             |                     |
| Trial design                     | 3a      | Description of pilot trial design (such as parallel, factorial) including allocation ratio                                                                                                  | 5                   |
|                                  | 3b      | Important changes to methods after pilot trial commencement (such as eligibility criteria), with reasons                                                                                    | 5                   |
| Participants                     | 4a      | Eligibility criteria for participants                                                                                                                                                       | 5                   |
|                                  | 4b      | Settings and locations where the data were collected                                                                                                                                        | 5                   |
|                                  | 4c      | How participants were identified and consented                                                                                                                                              | 5                   |
| Interventions                    | 5       | The interventions for each group with sufficient details to allow replication, including how and when they were actually administered                                                       | 5-6                 |
| Outcomes                         | 6a      | Completely defined prespecified assessments or measurements to address each pilot trial objective specified in 2b, including how and when they were assessed                                | 6                   |
|                                  | 6b      | Any changes to pilot trial assessments or measurements after the pilot trial commenced, with reasons                                                                                        | 5                   |
|                                  | 6c      | If applicable, prespecified criteria used to judge whether, or how, to proceed with future definitive trial                                                                                 | NA                  |
| Sample size                      | 7a      | Rationale for numbers in the pilot trial                                                                                                                                                    | 5                   |
|                                  | 7b      | When applicable, explanation of any interim analyses and stopping guidelines                                                                                                                | NA                  |
| Randomisation:                   |         |                                                                                                                                                                                             |                     |
| Sequence generation              | 8a      | Method used to generate the random allocation sequence                                                                                                                                      | 5                   |
|                                  | 8b      | Type of randomisation(s); details of any restriction (such as blocking and block size)                                                                                                      | 5                   |
| Allocation concealment mechanism | 9       | Mechanism used to implement the random allocation sequence (such as sequentially numbered containers), describing any steps taken to conceal the sequence until interventions were assigned | 5                   |

|                                                      |     |                                                                                                                                                                                       |                   |
|------------------------------------------------------|-----|---------------------------------------------------------------------------------------------------------------------------------------------------------------------------------------|-------------------|
| Implementation                                       | 10  | Who generated the random allocation sequence, who enrolled participants, and who assigned participants to interventions                                                               | 5                 |
| Blinding                                             | 11a | If done, who was blinded after assignment to interventions (for example, participants, care providers, those assessing outcomes) and how                                              | NA                |
|                                                      | 11b | If relevant, description of the similarity of interventions                                                                                                                           | NA                |
| Statistical methods                                  | 12  | Methods used to address each pilot trial objective whether qualitative or quantitative                                                                                                | 6                 |
| <b>Results</b>                                       |     |                                                                                                                                                                                       |                   |
| Participant flow (a diagram is strongly recommended) | 13a | For each group, the numbers of participants who were approached and/or assessed for eligibility, randomly assigned, received intended treatment, and were assessed for each objective | Figure 1          |
|                                                      | 13b | For each group, losses and exclusions after randomisation, together with reasons                                                                                                      | Figure 1          |
| Recruitment                                          | 14a | Dates defining the periods of recruitment and follow-up                                                                                                                               | 6                 |
|                                                      | 14b | Why the pilot trial ended or was stopped                                                                                                                                              | NA                |
| Baseline data                                        | 15  | A table showing baseline demographic and clinical characteristics for each group                                                                                                      | Table 3           |
| Numbers analysed                                     | 16  | For each objective, number of participants (denominator) included in each analysis. If relevant, these numbers should be by randomised group                                          | Tables 4, 5 and 7 |
| Outcomes and estimation                              | 17  | For each objective, results including expressions of uncertainty (such as 95% confidence interval) for any estimates. If relevant, these results should be by randomised group        | Table 7           |
| Ancillary analyses                                   | 18  | Results of any other analyses performed that could be used to inform the future definitive trial                                                                                      | NA                |
| Harms                                                | 19  | All important harms or unintended effects in each group (for specific guidance see CONSORT for harms)                                                                                 | 9                 |
|                                                      | 19a | If relevant, other important unintended consequences                                                                                                                                  | NA                |
| <b>Discussion</b>                                    |     |                                                                                                                                                                                       |                   |
| Limitations                                          | 20  | Pilot trial limitations, addressing sources of potential bias and remaining uncertainty about feasibility                                                                             | 11-12             |
| Generalisability                                     | 21  | Generalisability (applicability) of pilot trial methods and findings to future definitive trial and other studies                                                                     | 11-12             |
| Interpretation                                       | 22  | Interpretation consistent with pilot trial objectives and findings, balancing potential benefits and harms, and considering other relevant evidence                                   | 11-12             |
|                                                      | 22a | Implications for progression from pilot to future definitive trial, including any proposed amendments                                                                                 | 11-12             |
| <b>Other information</b>                             |     |                                                                                                                                                                                       |                   |
| Registration                                         | 23  | Registration number for pilot trial and name of trial registry                                                                                                                        | 1                 |
| Protocol                                             | 24  | Where the pilot trial protocol can be accessed, if available                                                                                                                          | 1                 |
| Funding                                              | 25  | Sources of funding and other support (such as supply of drugs), role of funders                                                                                                       | 13                |
|                                                      | 26  | Ethical approval or approval by research review committee, confirmed with reference number                                                                                            | 5                 |

1  
2  
3  
4  
5  
6  
7  
8  
9  
10  
11  
12  
13  
14  
15  
16  
17  
18  
19  
20  
21  
22  
23  
24  
25  
26  
27  
28  
29  
30  
31  
32  
33  
34  
35  
36  
37  
38  
39  
40  
41  
42  
43  
44  
45  
46  
47

Citation: Eldridge SM, Chan CL, Campbell MJ, Bond CM, Hopewell S, Thabane L, et al. CONSORT 2010 statement: extension to randomised pilot and feasibility trials. BMJ. 2016;355.  
\*We strongly recommend reading this statement in conjunction with the CONSORT 2010, extension to randomised pilot and feasibility trials, Explanation and Elaboration for important clarifications on all the items. If relevant, we also recommend reading CONSORT extensions for cluster randomised trials, non-inferiority and equivalence trials, non-pharmacological treatments, herbal interventions, and pragmatic trials. Additional extensions are forthcoming: for those and for up to date references relevant to this checklist, see [www.consort-statement.org](http://www.consort-statement.org).

For peer review only

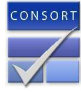

## CONSORT 2010 checklist of information to include when reporting a pilot or feasibility randomized trial in a journal or conference abstract

| Item               | Description                                                                                                 | Reported on line number |
|--------------------|-------------------------------------------------------------------------------------------------------------|-------------------------|
| Title              | Identification of study as randomised pilot or feasibility trial                                            | 1                       |
| Authors *          | Contact details for the corresponding author                                                                | 1                       |
| Trial design       | Description of pilot trial design (eg, parallel, cluster)                                                   | 2                       |
| Methods            |                                                                                                             |                         |
| Participants       | Eligibility criteria for participants and the settings where the pilot trial was conducted                  | 2                       |
| Interventions      | Interventions intended for each group                                                                       | 2                       |
| Objective          | Specific objectives of the pilot trial                                                                      | 2                       |
| Outcome            | Prespecified assessment or measurement to address the pilot trial objectives**                              | 2                       |
| Randomization      | How participants were allocated to interventions                                                            | 2                       |
| Blinding (masking) | Whether or not participants, care givers, and those assessing the outcomes were blinded to group assignment | 2                       |
| Results            |                                                                                                             |                         |
| Numbers randomized | Number of participants screened and randomised to each group for the pilot trial objectives**               | 2                       |
| Recruitment        | Trial status†                                                                                               |                         |
| Numbers analysed   | Number of participants analysed in each group for the pilot objectives**                                    | 2                       |
| Outcome            | Results for the pilot objectives, including any expressions of uncertainty**                                | 2                       |
| Harms              | Important adverse events or side effects                                                                    | 2                       |
| Conclusions        | General interpretation of the results of pilot trial and their implications for the future definitive trial | 2                       |
| Trial registration | Registration number for pilot trial and name of trial register                                              | 1                       |
| Funding            | Source of funding for pilot trial                                                                           | 13                      |

Citation: Eldridge SM, Chan CL, Campbell MJ, Bond CM, Hopewell S, Thabane L, et al. CONSORT 2010 statement: extension to randomised pilot and feasibility trials. *BMJ*. 2016;355.

*\*this item is specific to conference abstracts*

*\*\*Space permitting, list all pilot trial objectives and give the results for each. Otherwise, report those that are a priori agreed as the most important to the decision to proceed with the future definitive RCT.*

*†For conference abstracts.*
